# Supplementary material for: Nitrenium ions and trivalent boron ligands as analogues of N-heterocyclic carbenes in olefin metathesis: a computational study
Source: Royal Society of Chemistry journal article supplement (doi:10.1039/c5dt03446a), 2015-01-01
Supplement: c5dt03446a1.pdf [file c5dt03446a1.pdf]

## Supporting Information for

### Nitrenium ions and trivalent boron ligands as analogues of N-heterocyclic carbenes in olefin metathesis; a computational study

A. Pazio,<sup>ab</sup> K. Woźniak,<sup>b</sup> K. Grela<sup>b</sup> and B. Trzaskowski\*<sup>a</sup>

<sup>a</sup> Centre of New Technologies, University of Warsaw, Banacha 2c, 02-097 Warszawa, Poland

<sup>b</sup> Biological and Chemical Research Centre, Department of Chemistry, University of Warsaw, Żwirki i Wigury 101, 02-089 Warszawa, Poland

|                                                     |   |
|-----------------------------------------------------|---|
| Geometry comparison of investigated structures..... | 2 |
| Numeric values.....                                 | 2 |
| Table S1. ....                                      | 2 |
| Table S2. ....                                      | 2 |
| Table S3. ....                                      | 3 |
| Table S4. ....                                      | 4 |
| Molecular overlays of investigated structures.....  | 5 |
| Figure S1. ....                                     | 5 |
| Figure S2. ....                                     | 5 |
| Energy Values Tables.....                           | 5 |
| Table S5. ....                                      | 5 |
| Table S6. ....                                      | 6 |
| Table S7. ....                                      | 6 |
| Table S8. ....                                      | 7 |
| Geometries in xyz format.....                       | 7 |

## Geometry comparison of investigated structures

### Numeric values

**Table S1.** Geometry comparison amongst **2** structures (triazolium derivatives; **NHNs**). **1** stands for two types of Hoveyda catalyst's structures: from the **X-ray** measurement and DFT-**optimized**.

|                         | <b>1 X-ray<sup>1</sup></b> | <b>1 opt</b> | <b>2a</b> | <b>2b</b> | <b>2c</b> |             |                  |                    |
|-------------------------|----------------------------|--------------|-----------|-----------|-----------|-------------|------------------|--------------------|
| Ru(1)-C(22)             | 1.829(1)                   | 1.832        | 1.846     | 1.848     | 1.850     | Ru center   | Bond length (Å)  |                    |
| Ru(1)-C(1)              | 1.979(1)                   | 1.972        | 2.052     | 2.033     | 2.010     |             |                  |                    |
| Ru(1)-Cl(1)             | 2.3379(5)                  | 2.404        | 2.389     | 2.385     | 2.385     |             |                  |                    |
| Ru(1)-Cl(2)             | 2.3278(5)                  | 2.392        | 2.392     | 2.389     | 2.388     |             |                  |                    |
| Ru(1)-O(1)              | 2.256(1)                   | 2.322        | 2.188     | 2.183     | 2.192     |             |                  |                    |
| C(4)-C(22) distance     | 3.072(2)                   | 3.188        | 3.157     | 3.160     | 3.134     |             |                  |                    |
| O(1)-C(28)              | 1.370(2)                   | 1.352        | 1.359     | 1.359     | 1.358     | O atom      |                  |                    |
| O(1)-C(29)              | 1.469(2)                   | 1.449        | 1.469     | 1.471     | 1.471     |             |                  |                    |
| N(1)-C(4)               | 1.434(2)                   | 1.432        | 1.437     | 1.439     | 1.434     | NHC         |                  |                    |
| N(2)-C(13)              | 1.439(2)                   | 1.442        | 1.440     | 1.441     | 1.437     |             |                  |                    |
| C(2)-C(3)               | 1.524(2)                   | 1.516        | 1.371     | 1.360     | 1.375     |             |                  |                    |
| C(2)-N(1)               | 1.472(2)                   | 1.475        | 1.372     | 1.363     | 1.370     |             |                  |                    |
| C(3)-N(2)               | 1.474(2)                   | 1.476        | 1.367     | 1.359     | 1.391     |             |                  |                    |
| N(3)-N(1)               | 1.351(2)                   | 1.352        | 1.331     | 1.334     | 1.337     |             |                  |                    |
| N(3)-N(2)               | 1.352(2)                   | 1.354        | 1.336     | 1.340     | 1.343     |             |                  |                    |
| N(1)-C(1)/N(3)-N(2)     | 107.2(1)                   | 106.77       | 104.34    | 104.50    | 105.86    | NHC / ADC   | Plane angles (°) |                    |
| C(1)/N(3)-N(1)-C(4)     | 126.9(1)                   | 126.77       | 122.88    | 123.78    | 124.34    |             |                  |                    |
| C(1)/N(3)-N(1)-C(13)    | 126.6(1)                   | 126.73       | 120.43    | 121.01    | 121.27    |             |                  |                    |
| C(1)/N(3)-N(1)-C(2)     | 113.6(1)                   | 113.83       | 112.17    | 111.56    | 111.16    |             |                  |                    |
| C(1)/N(3)-N(2)-C(3)     | 113.5(1)                   | 113.42       | 112.33    | 111.74    | 111.40    |             |                  |                    |
| C(1)/N(3)-Ru(1)-C(22)   | 101.34(6)                  | 103.10       | 102.54    | 102.34    | 102.28    |             |                  |                    |
| Cl(1)-Ru(1)-Cl(2)       | 156.25(1)                  | 160.20       | 163.40    | 163.37    | 163.30    | Ru center   |                  |                    |
| Ru(1)-C(22)-C(23)       | 118.5(1)                   | 119.10       | 117.98    | 117.84    | 117.99    |             |                  |                    |
| C(22)-C(23)-C(28)       | 118.5(1)                   | 119.32       | 117.64    | 117.63    | 117.71    |             |                  |                    |
| Ru(1)-C(1)-N(1)-C(2)    | -173.3(1)                  | -178.09      | 177.97    | 176.42    | 177.42    | NHC / ADC   |                  | Torsion angles (°) |
| Ru(1)-C(1)-N(2)-C(3)    | 171.0(1)                   | -178.58      | -178.29   | -177.02   | -177.87   |             |                  |                    |
| Ru(1)-C(1)-N(1)-C(4)    | 17.7(2)                    | -10.81       | -3.64     | -5.76     | -4.94     |             |                  |                    |
| Ru(1)-C(1)-N(2)-C(13)   | -22.4(2)                   | 13.67        | 3.24      | 4.45      | 4.09      |             |                  |                    |
| C(4)-N(1)-Ru(1)-C(22)   | -2.91(9)                   | -3.52        | -0.04     | -0.83     | -0.51     |             |                  |                    |
| C(22)-Ru(1)-O(1)-C(28)  | 7.1(1)                     | -1.66        | 3.17      | 2.66      | 2.91      | benzylidene |                  |                    |
| Ru(1)-C(22)-C(23)-C(28) | 4.1(2)                     | -2.26        | 2.58      | 2.18      | 2.27      |             |                  |                    |
| C(22)-C(23)-C(28)-O(1)  | 2.7(2)                     | 0.55         | 0.39      | 0.31      | 0.46      |             |                  |                    |
| O(1)-Ru(1)-C(22)-C(23)  | -5.8(1)                    | 1.99         | -2.98     | -2.51     | -2.68     |             |                  |                    |
| C(1)-Ru(1)-O(1)-C(29)   | 90.4(8)                    | -51.84       | 7.18      | -6.79     | -4.40     |             |                  |                    |

**Table S2.** Geometry comparison amongst **9** structures (boryl derivatives; **NHBs**). **1** stands for two types of Hoveyda catalyst's structures: from the **X-ray** measurement and DFT-**optimized**.

|                     | <b>1 X-ray</b> | <b>1 opt</b> | <b>9a</b> | <b>9b</b> | <b>9c</b> |           |                 |
|---------------------|----------------|--------------|-----------|-----------|-----------|-----------|-----------------|
| Ru(1)-C(22)         | 1.829(1)       | 1.832        | 1.823     | 1.824     | 1.824     | Ru center | Bond length (Å) |
| Ru(1)-C(1)/B(1)     | 1.979(1)       | 1.972        | 2.016     | 2.023     | 2.002     |           |                 |
| Ru(1)-Cl(1)         | 2.3379(5)      | 2.404        | 2.384     | 2.387     | 2.385     |           |                 |
| Ru(1)-Cl(2)         | 2.3278(5)      | 2.392        | 2.408     | 2.409     | 2.406     |           |                 |
| Ru(1)-O(1)          | 2.256(1)       | 2.322        | 2.540     | 2.546     | 2.526     |           |                 |
| C(4)-C(22) distance | 3.072(2)       | 3.188        | 3.249     | 3.237     | 3.246     |           |                 |
| O(1)-C(28)          | 1.370(2)       | 1.352        | 1.350     | 1.349     | 1.349     | O atom    |                 |
| O(1)-C(29)          | 1.469(2)       | 1.449        | 1.430     | 1.430     | 1.431     |           |                 |

<sup>1</sup> REFCODE: ABEJUM01 CSD ver. 5.35 Nov 2013

|                            |           |         |         |         |         |             |                    |
|----------------------------|-----------|---------|---------|---------|---------|-------------|--------------------|
| N(1)-C(4)                  | 1.434(2)  | 1.432   | 1.416   | 1.415   | 1.417   | NHC         |                    |
| N(2)-C(13)                 | 1.439(2)  | 1.442   | 1.420   | 1.420   | 1.422   |             |                    |
| C(2)-C(3)                  | 1.524(2)  | 1.516   | 1.348   | 1.356   | 1.409   |             |                    |
| C(2)-N(1)                  | 1.472(2)  | 1.475   | 1.401   | 1.411   | 1.391   |             |                    |
| C(3)-N(2)                  | 1.474(2)  | 1.476   | 1.398   | 1.409   | 1.388   |             |                    |
| C(1)/B(1)-N(1)             | 1.351(2)  | 1.352   | 1.469   | 1.466   | 1.476   |             |                    |
| C(1)/B(1)-N(2)             | 1.352(2)  | 1.354   | 1.472   | 1.469   | 1.479   |             |                    |
| N(1)-C(1)/B(1)-N(2)        | 107.2(1)  | 106.77  | 101.68  | 101.67  | 102.32  | NHC         | Plane angles (°)   |
| C(1)/B(1)-N(1)-C(4)        | 126.9(1)  | 126.77  | 130.21  | 128.77  | 129.72  |             |                    |
| C(1)/B(1)-N(1)-C(13)       | 126.6(1)  | 126.73  | 129.93  | 128.33  | 129.05  |             |                    |
| C(1)/B(1)-N(1)-C(2)        | 113.6(1)  | 113.83  | 109.71  | 110.12  | 110.07  |             |                    |
| C(1)/B(1)-N(2)-C(3)        | 113.5(1)  | 113.42  | 109.67  | 110.10  | 110.12  |             |                    |
| C(1)/B(1)-Ru(1)-C(22)      | 101.34(6) | 103.10  | 98.90   | 99.59   | 99.48   |             |                    |
| Cl(1)-Ru(1)-Cl(2)          | 156.25(1) | 160.20  | 149.45  | 150.03  | 150.34  | Ru center   |                    |
| Ru(1)-C(22)-C(23)          | 118.5(1)  | 119.10  | 122.30  | 122.50  | 121.97  |             |                    |
| C(22)-C(23)-C(28)          | 118.5(1)  | 119.32  | 121.44  | 121.47  | 121.37  |             |                    |
| Ru(1)-C(1)/B(1)-N(1)-C(2)  | -173.3(1) | -178.09 | 175.70  | 177.51  | 175.51  | NHC         | Torsion angles (°) |
| Ru(1)-C(1)/B(1)-N(2)-C(3)  | 171.0(1)  | -178.58 | -175.96 | -177.66 | -175.76 |             |                    |
| Ru(1)-C(1)/B(1)-N(1)-C(4)  | 17.7(2)   | -10.81  | -16.26  | -12.34  | -11.45  |             |                    |
| Ru(1)-C(1)/B(1)-N(2)-C(13) | -22.4(2)  | 13.67   | 15.91   | 14.11   | 13.12   |             |                    |
| C(4)-N(1)-Ru(1)-C(22)      | -2.91(9)  | -3.52   | 7.22    | 8.25    | 8.60    |             |                    |
| C(22)-Ru(1)-O(1)-C(28)     | 7.1(1)    | -1.66   | -2.11   | -1.50   | -0.42   | benzylidene |                    |
| Ru(1)-C(22)-C(23)-C(28)    | 4.1(2)    | -2.26   | 0.21    | 0.38    | 1.41    |             |                    |
| C(22)-C(23)-C(28)-O(1)     | 2.7(2)    | 0.55    | -2.39   | -1.92   | -1.74   |             |                    |
| O(1)-Ru(1)-C(22)-C(23)     | -5.8(1)   | 1.99    | 1.00    | 0.59    | -0.46   |             |                    |
| C(1)/B(1)-Ru(1)-O(1)-C(29) | 90.4(8)   | -51.84  | -143.40 | -147.63 | -146.52 |             |                    |

**Table S3.** Geometry comparison amongst **12** and **13** structures (backbone modifications of **2**). **1** stands for two types of Hoveyda catalyst's structures: from the **X-ray** measurement and DFT-optimized.

|                       | <b>1 opt</b> | <b>12a</b> | <b>12b</b> | <b>13a</b> | <b>13b</b> |           |                  |
|-----------------------|--------------|------------|------------|------------|------------|-----------|------------------|
| Ru(1)-C(22)           | 1.832        | 1.831      | 1.830      | 1.832      | 1.831      | Ru center | Bond length (Å)  |
| Ru(1)-C(1)            | 1.972        | 2.103      | 2.108      | 2.099      | 2.101      |           |                  |
| Ru(1)-Cl(1)           | 2.404        | 2.396      | 2.402      | 2.397      | 2.398      |           |                  |
| Ru(1)-Cl(2)           | 2.392        | 2.399      | 2.393      | 2.401      | 2.402      |           |                  |
| Ru(1)-O(1)            | 2.322        | 2.200      | 2.206      | 2.202      | 2.202      |           |                  |
| C(4)-C(22) distance   | 3.188        | 3.189      | 3.194      | 3.191      | 3.190      |           |                  |
| O(1)-C(28)            | 1.352        | 1.359      | 1.360      | 1.358      | 1.358      |           |                  |
| O(1)-C(29)            | 1.449        | 1.458      | 1.457      | 1.460      | 1.460      |           |                  |
| N(1)-C(4)             | 1.432        | 1.423      | 1.424      | 1.433      | 1.432      | NHC       |                  |
| N(2)-C(13)            | 1.442        | 1.436      | 1.438      | 1.427      | 1.427      |           |                  |
| C(2)-C(3)             | 1.516        | 1.422      | 1.428      | 1.423      | 1.426      |           |                  |
| C(2)-N(1)             | 1.475        | 1.433      | 1.416      | 1.351      | 1.352      |           |                  |
| C(3)-N(2)             | 1.476        | 1.347      | 1.344      | 1.426      | 1.414      |           |                  |
| N(3)-N(1)             | 1.352        | 1.347      | 1.352      | 1.316      | 1.322      |           |                  |
| N(3)-N(2)             | 1.354        | 1.321      | 1.333      | 1.350      | 1.353      |           |                  |
| N(1)-C(1)/N(3)-N(2)   | 106.77       | 104.05     | 103.84     | 104.15     | 103.89     | NHC       | Plane angles (°) |
| C(1)/N(3)-N(1)-C(4)   | 126.77       | 122.88     | 121.82     | 122.13     | 121.62     |           |                  |
| C(1)/N(3)-N(1)-C(13)  | 126.73       | 120.13     | 119.72     | 120.59     | 120.53     |           |                  |
| C(1)/N(3)-N(1)-C(2)   | 113.83       | 113.53     | 113.34     | 113.61     | 113.92     |           |                  |
| C(1)/N(3)-N(2)-C(3)   | 113.42       | 113.90     | 113.96     | 113.76     | 113.61     |           |                  |
| C(1)/N(3)-Ru(1)-C(22) | 103.10       | 102.10     | 102.27     | 102.78     | 102.91     |           |                  |
| Cl(1)-Ru(1)-Cl(2)     | 160.20       | 162.14     | 162.38     | 163.09     | 163.25     | Ru center |                  |
| Ru(1)-C(22)-C(23)     | 119.10       | 118.02     | 118.24     | 118.17     | 118.17     |           |                  |
| C(22)-C(23)-C(28)     | 119.32       | 117.74     | 117.72     | 117.65     | 117.64     |           |                  |
| Ru(1)-C(1)-N(1)-C(2)  | -178.09      | 178.30     | 153.86     | -179.81    | -179.73    | NH ion    | Torsion          |
| Ru(1)-C(1)-N(2)-C(3)  | -178.58      | -178.61    | -157.89    | 179.72     | 179.61     |           |                  |
| Ru(1)-C(1)-N(1)-C(4)  | -10.81       | -2.78      | -34.75     | 0.79       | 0.97       |           |                  |

|                         |        |       |        |       |       |             |           |
|-------------------------|--------|-------|--------|-------|-------|-------------|-----------|
| Ru(1)-C(1)-N(2)-C(13)   | 13.67  | 1.53  | 25.70  | 1.85  | 1.99  | benzylidene | es<br>(°) |
| C(4)-N(1)-Ru(1)-C(22)   | -3.52  | 0.31  | -2.87  | 0.77  | 0.73  |             |           |
| C(22)-Ru(1)-O(1)-C(28)  | -1.66  | 1.97  | 0.08   | 1.90  | 1.84  | benzylidene |           |
| Ru(1)-C(22)-C(23)-C(28) | -2.26  | 2.09  | 0.43   | 2.05  | 2.06  |             |           |
| C(22)-C(23)-C(28)-O(1)  | 0.55   | -0.21 | -0.34  | -0.23 | -0.30 |             |           |
| O(1)-Ru(1)-C(22)-C(23)  | 1.99   | -2.10 | -0.26  | -2.04 | -2.02 |             |           |
| C(1)-Ru(1)-O(1)-C(29)   | -51.84 | 21.13 | -31.85 | 21.10 | 20.40 |             |           |

**Table S4.** The comparison of the geometry amongst all investigated compounds – type **a: 1** stands for two types of Hoveyda catalyst's structures: from the **X-ray** measurement and DFT-**optimized**.

|                         | <b>1 X-ray<br/>X=C(1)</b> | <b>1 opt X=C(1)</b> | <b>2a X=N(3)</b> | <b>9a X=B(1)</b> | <b>12a<br/>X=N(3)</b> | <b>13a<br/>X=N(3)</b> |             |                    |
|-------------------------|---------------------------|---------------------|------------------|------------------|-----------------------|-----------------------|-------------|--------------------|
| Ru(1)-C(22)             | 1.829(1)                  | 1.833               | 1.848            | 1.823            | 1.831                 | 1.832                 | Ru center   | Bond length (Å)    |
| Ru(1)-X                 | 1.979(1)                  | 1.972               | 2.033            | 2.016            | 2.103                 | 2.099                 |             |                    |
| Ru(1)-Cl(1)             | 2.3379(5)                 | 2.396               | 2.386            | 2.384            | 2.396                 | 2.397                 |             |                    |
| Ru(1)-Cl(2)             | 2.3278(5)                 | 2.400               | 2.389            | 2.408            | 2.399                 | 2.401                 |             |                    |
| Ru(1)-O(1)              | 2.256(1)                  | 2.328               | 2.183            | 2.540            | 2.200                 | 2.202                 |             |                    |
| C(4)-C(22) distance     | 3.072(2)                  | 3.166               | 3.160            | 3.249            | 3.189                 | 3.191                 |             |                    |
| O(1)-C(28)              | 1.370(2)                  | 1.352               | 1.359            | 1.350            | 1.359                 | 1.358                 | O           |                    |
| O(1)-C(29)              | 1.469(2)                  | 1.449               | 1.471            | 1.430            | 1.458                 | 1.460                 |             |                    |
| N(1)-C(4)               | 1.434(2)                  | 1.423               | 1.439            | 1.416            | 1.423                 | 1.433                 | NHC         |                    |
| N(2)-C(13)              | 1.439(2)                  | 1.427               | 1.441            | 1.420            | 1.436                 | 1.427                 |             |                    |
| C(2)-C(3)               | 1.524(2)                  | 1.524               | 1.360            | 1.348            | 1.422                 | 1.423                 |             |                    |
| C(2)-N(1)               | 1.472(2)                  | 1.467               | 1.363            | 1.401            | 1.433                 | 1.351                 |             |                    |
| C(3)-N(2)               | 1.474(2)                  | 1.462               | 1.359            | 1.398            | 1.347                 | 1.426                 |             |                    |
| X-N(1)                  | 1.351(2)                  | 1.352               | 1.334            | 1.469            | 1.347                 | 1.316                 |             |                    |
| X-N(2)                  | 1.352(2)                  | 1.360               | 1.340            | 1.472            | 1.321                 | 1.350                 |             |                    |
| N(1)-X-N(2)             | 107.2(1)                  | 106.71              | 104.50           | 101.68           | 104.05                | 104.15                | ADC         | Plane angles (°)   |
| X-N(1)-C(4)             | 126.9(1)                  | 127.77              | 123.78           | 130.21           | 122.88                | 122.13                |             |                    |
| X-N(1)-C(13)            | 126.6(1)                  | 124.58              | 121.01           | 129.93           | 120.13                | 120.59                |             |                    |
| X-N(1)-C(2)             | 113.6(1)                  | 112.97              | 111.56           | 109.71           | 113.53                | 113.61                |             |                    |
| X-N(1)-C(3)             | 113.5(1)                  | 113.40              | 111.74           | 109.67           | 113.90                | 113.76                |             |                    |
| X-Ru(1)-C(22)           | 101.34(6)                 | 102.68              | 102.34           | 98.90            | 102.10                | 102.78                |             |                    |
| Cl(1)-Ru(1)-Cl(2)       | 156.25(1)                 | 160.26              | 163.37           | 149.45           | 162.14                | 163.09                | Ru center   |                    |
| Ru(1)-C(22)-C(23)       | 118.5(1)                  | 119.3               | 117.8            | 122.30           | 118.02                | 118.17                |             |                    |
| C(22)-C(23)-C(28)       | 118.5(1)                  | 119.3               | 117.6            | 121.44           | 117.74                | 117.65                |             |                    |
| Ru(1)-X-N(1)-C(2)       | -173.3(1)                 | -174.13             | 176.42           | 175.70           | 178.30                | -179.81               | NHC         | Torsion angles (°) |
| Ru(1)-X-N(1)-C(3)       | 171.0(1)                  | -174.91             | -177.02          | -175.96          | -178.61               | 179.72                |             |                    |
| Ru(1)-X-N(1)-C(4)       | 17.7(2)                   | 3.48                | -5.76            | -16.26           | -2.78                 | 0.79                  |             |                    |
| Ru(1)-X-N(2)-C(13)      | -22.4(2)                  | 5.28                | 4.45             | 15.91            | 1.53                  | 1.85                  |             |                    |
| C(4)-N(1)-Ru(1)-C(22)   | -2.91(9)                  | 1.60                | -0.83            | 7.22             | 0.31                  | 0.77                  |             |                    |
| C(22)-Ru(1)-O(1)-C(28)  | 7.1(1)                    | 0.99                | 2.66             | -2.11            | 1.97                  | 1.90                  | benzylidene |                    |
| Ru(1)-C(22)-C(23)-C(28) | 4.1(2)                    | 1.56                | 2.18             | 0.21             | 2.09                  | 2.05                  |             |                    |
| C(22)-C(23)-C(28)-O(1)  | 2.7(2)                    | -0.53               | 0.31             | -2.39            | -0.21                 | -0.23                 |             |                    |
| O(1)-Ru(1)-C(22)-C(23)  | -5.8(1)                   | -1.30               | -2.51            | 1.00             | -2.10                 | -2.04                 |             |                    |
| X-Ru(1)-O(1)-C(29)      | 90.4(8)                   | 18.36               | -6.79            | -143.40          | 21.13                 | 21.10                 |             |                    |

## Molecular overlays of investigated structures

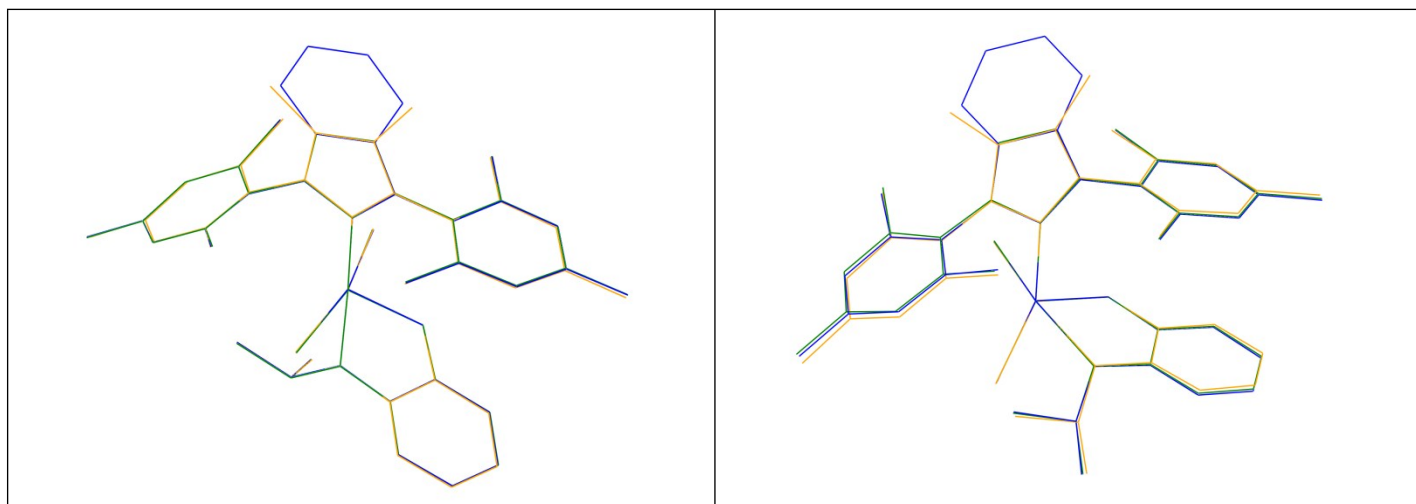

**Figure S1.** Molecular overlay of investigated structures - catalyst **2a** (green), **2b** (orange) and **2c** (blue): *trans* (left) and *cis* (right).

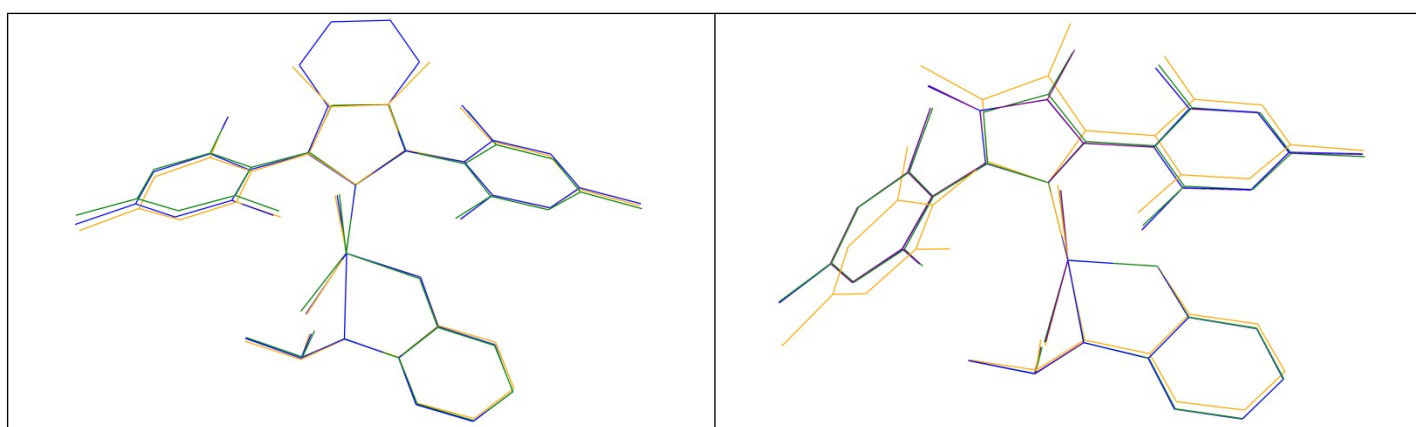

**Figure S2.** Molecular overlay of investigated structures, catalyst **9** (left): **9a** (green), **9b** (orange) and **9c** (blue) and catalysts 12 and 13: **12a** (green), **12b** (orange) and **13a** (blue), **13b** (purple).

## Energy Values Tables

**Table S5.** Total energy values (E) and free energy values (G; as defined in the manuscript) for the initiation reaction following either the interchange or dissociative mechanism for **2a-c**. "S" stands for pre-catalyst, "TS" for transition state and "P" for product of the reaction (activated catalyst).

| compound  | structure                 | M06 Gas Phase, LACVP++ E (Hartrees) | solvation E in DCM (hartrees) | ZPE (kcal/mol) | S (cal/mol) | Thermal correction to enthalpy (kcal/mol) | G (Hartrees) |
|-----------|---------------------------|-------------------------------------|-------------------------------|----------------|-------------|-------------------------------------------|--------------|
| <b>2a</b> | S <i>trans</i>            | -2417.761135                        | -0.056417                     | 374.124        | 242.131     | 23.281                                    | -2417.299234 |
|           | S <i>cis</i>              | -2417.746187                        | -0.064781                     | 374.501        | 234.568     | 22.930                                    | -2417.289017 |
|           | TS interchange mechanism  | -2574.873877                        | -0.053483                     | 442.276        | 261.381     | 26.574                                    | -2574.304329 |
|           | P interchange mechanism   | -2574.906103                        | -0.054168                     | 442.931        | 260.536     | 26.761                                    | -2574.335496 |
|           | TS dissociative mechanism | no data                             |                               |                |             |                                           |              |
|           | P dissociative mechanism  | -2417.716021                        | -0.060689                     | 373.687        | 240.668     | 23.074                                    | -2417.258723 |
| <b>2b</b> | S <i>trans</i>            | -2496.371294                        | -0.052567                     | 408.600        | 256.610     | 25.533                                    | -2495.853889 |
|           | S <i>cis</i>              | -2496.355843                        | -0.060856                     | 408.997        | 249.042     | 25.148                                    | -2495.843113 |
|           | TS interchange mechanism  | -2653.484029                        | -0.049358                     | 476.873        | 283.057     | 29.335                                    | -2652.861117 |
|           | P interchange mechanism   | -2653.515925                        | -0.050040                     | 477.359        | 276.772     | 29.022                                    | -2652.890433 |

|    |                           |              |           |         |         |        |              |
|----|---------------------------|--------------|-----------|---------|---------|--------|--------------|
|    | TS dissociative mechanism | no data      |           |         |         |        |              |
|    | P dissociative mechanism  | -2496.324666 | -0.059237 | 408.122 | 256.816 | 25.361 | -2495.815064 |
| 2c | S trans                   | -2571.329478 | -0.049819 | 403.660 | 244.453 | 24.346 | -2570.813315 |
|    | S cis                     | -2571.314616 | -0.057331 | 403.969 | 245.913 | 24.628 | -2570.805717 |
|    | TS interchange mechanism  | -2728.443266 | -0.046589 | 472.093 | 270.388 | 28.130 | -2727.821105 |
|    | P interchange mechanism   | -2728.474174 | -0.047698 | 472.519 | 270.108 | 28.351 | -2727.851958 |
|    | TS dissociative mechanism | no data      |           |         |         |        |              |
|    | P dissociative mechanism  | -2571.285802 | -0.052919 | 403.287 | 258.402 | 25.293 | -2570.778449 |

**Table S6.** Total energy values (E) and free energy values (G; as defined in the manuscript) for the initiation reaction following either the interchange or dissociative mechanism for **3a-c**. "S" stands for pre-catalyst, "TS" for transition state and "P" for product of the reaction (activated catalyst).

| compound | structure                 | M06 Gas Phase, LACVP++ E (Hartrees) | solvation E in DCM (hartrees) | ZPE (kcal/mol) | S (cal/mol) | Thermal correction to enthalpy (kcal/mol) | G (Hartrees) |
|----------|---------------------------|-------------------------------------|-------------------------------|----------------|-------------|-------------------------------------------|--------------|
| 3a       | S trans                   | -2388.270665                        | -0.058248                     | 371.141        | 240.512     | 23.133                                    | -2387.814815 |
|          | S cis                     | -2388.262774                        | -0.068542                     | 371.470        | 233.676     | 22.810                                    | -2387.813962 |
|          | TS interchange mechanism  | -2545.395341                        | -0.052079                     | 439.033        | 267.346     | 27.049                                    | -2544.831633 |
|          | P interchange mechanism   | -2545.404026                        | -0.055671                     | 439.715        | 271.257     | 27.404                                    | -2544.844115 |
|          | TS dissociative mechanism | -2388.248668                        | -0.059280                     | 370.798        | 237.821     | 22.725                                    | -2387.793769 |
|          | P dissociative mechanism  | -2388.259648                        | -0.061823                     | 371.288        | 241.250     | 23.116                                    | -2387.807516 |
| 3b       | S trans                   | -2466.865876                        | -0.056832                     | 405.860        | 254.268     | 25.212                                    | -2466.356502 |
|          | S cis                     | -2466.857539                        | -0.067169                     | 406.340        | 247.169     | 24.863                                    | -2466.354921 |
|          | TS interchange mechanism  | -2623.998509                        | -0.050510                     | 473.54         | 290.771     | 29.844                                    | -2623.384912 |
|          | P interchange mechanism   | -2623.999537                        | -0.054406                     | 474.189        | 286.429     | 29.569                                    | -2623.387177 |
|          | TS dissociative mechanism | -2466.843927                        | -0.058523                     | 405.393        | 244.506     | 24.257                                    | -2466.333874 |
|          | P dissociative mechanism  | -2466.854621                        | -0.061271                     | 406.018        | 262.619     | 25.767                                    | -2466.352514 |
| 3c       | S trans                   | -2541.856909                        | -0.056538                     | 401.093        | 251.291     | 24.687                                    | -2541.354260 |
|          | S cis                     | -2541.847907                        | -0.066123                     | 401.228        | 253.000     | 24.994                                    | -2541.354950 |
|          | TS interchange mechanism  | -2698.981183                        | -0.050794                     | 468.777        | 278.547     | 28.651                                    | -2698.371555 |
|          | P interchange mechanism   | -2698.990382                        | -0.054289                     | 469.560        | 282.332     | 28.982                                    | -2698.384272 |
|          | TS dissociative mechanism | -2541.834621                        | -0.057997                     | 400.527        | 248.927     | 24.307                                    | -2541.333816 |
|          | P dissociative mechanism  | -2541.845785                        | -0.060031                     | 401.209        | 251.710     | 24.674                                    | -2541.346664 |

**Table S7.** Total energy values (E) and free energy values (G; as defined in the manuscript) for the initiation reaction following the dissociative mechanism for **3a-c** systems with the Na<sup>+</sup> counterion. "S" stands for pre-catalyst, "TS" for transition state and "P" for product of the reaction (activated catalyst).

| compound           | structure                 | M06 Gas Phase, LACVP++ E (Hartrees) | solvation E in DCM (hartrees) | ZPE (kcal/mol) | S (cal/mol) | Thermal correction to enthalpy (kcal/mol) | G (Hartrees) |
|--------------------|---------------------------|-------------------------------------|-------------------------------|----------------|-------------|-------------------------------------------|--------------|
| 3a Na <sup>+</sup> | S trans                   | -2550.154572                        | -0.028021                     | 372.751        | 245.468     | 24.011                                    | -2550.046220 |
|                    | TS dissociative mechanism | -2550.131689                        | -0.030542                     | 372.247        | 250.405     | 24.276                                    | -2550.028762 |
|                    | P dissociative mechanism  | -2550.140608                        | -0.032342                     | 372.866        | 251.715     | 24.569                                    | -2550.037876 |

|                                    |                           |              |           |         |         |        |              |
|------------------------------------|---------------------------|--------------|-----------|---------|---------|--------|--------------|
| <b>3b</b><br><b>Na<sup>+</sup></b> | S trans                   | -2628.735431 | -0.027175 | 407.437 | 258.335 | 26.094 | -2466.356502 |
|                                    | TS dissociative mechanism | -2628.713879 | -0.028334 | 406.963 | 262.842 | 26.307 | -2466.333874 |
|                                    | P dissociative mechanism  | -2628.721537 | -0.031665 | 407.494 | 265.574 | 26.687 | -2466.352514 |
| <b>3c</b><br><b>Na<sup>+</sup></b> | S trans                   | -2703.702485 | -0.027740 | 402.565 | 264.566 | 26.224 | -2703.584679 |
|                                    | TS dissociative mechanism | -2703.680000 | -0.028483 | 402.051 | 262.351 | 25.903 | -2703.563256 |
|                                    | P dissociative mechanism  | -2703.688243 | -0.031623 | 402.642 | 263.430 | 26.210 | -2703.572949 |

**Table S8.** Total energy values (E) and free energy values (G; as defined in the manuscript) for the initiation reaction following either the interchange or dissociative mechanism for **4a-c**. "S" stands for pre-catalyst, "TS" for transition state and "P" for product of the reaction (activated catalyst).

| compound  | structure                 | M06<br>Gas Phase,<br>LACVP++<br>E<br>(Hartrees) | solvation E in DCM (hartrees) | ZPE (kcal/mol) | S (cal/mol) | Thermal<br>correction to<br>enthalpy<br>(kcal/mol) | G (Hartrees) |
|-----------|---------------------------|-------------------------------------------------|-------------------------------|----------------|-------------|----------------------------------------------------|--------------|
| <b>4a</b> | S trans                   | -2492.595071                                    | -0.019908                     | 369.061        | 237.910     | 23.238                                             | -2492.102794 |
|           | S cis                     | -2492.583903                                    | -0.025014                     | 369.295        | 234.141     | 23.029                                             | -2492.094901 |
|           | TS interchange mechanism  | -2649.709973                                    | -0.015629                     | 437.307        | 270.179     | 27.650                                             | -2649.112953 |
|           | P interchange mechanism   | -2649.738125                                    | -0.018163                     | 437.914        | 259.249     | 26.755                                             | -2649.138906 |
|           | TS dissociative mechanism | -2492.547931                                    | -0.018227                     | 368.603        | 244.424     | 23.607                                             | -2492.057207 |
|           | P dissociative mechanism  | -2492.558719                                    | -0.019241                     | 368.603        | 244.424     | 23.607                                             | -2492.069009 |
| <b>4b</b> | S trans                   | -2531.895843                                    | -0.018580                     | 386.378        | 253.210     | 24.951                                             | -2531.379176 |
|           | S cis                     | -2531.886402                                    | -0.024012                     | 386.768        | 238.998     | 24.015                                             | -2531.369289 |
|           | TS interchange mechanism  | -2689.012730                                    | -0.014718                     | 454.612        | 276.537     | 28.717                                             | -2688.388540 |
|           | P interchange mechanism   | -2689.040543                                    | -0.016159                     | 455.325        | 279.923     | 28.895                                             | -2688.417983 |
|           | TS dissociative mechanism | -2531.854282                                    | -0.017333                     | 385.876        | 251.196     | 24.728                                             | -2531.336568 |
|           | P dissociative mechanism  | -2531.861393                                    | -0.018514                     | 385.876        | 251.196     | 24.728                                             | -2531.344860 |
| <b>5a</b> | S trans                   | -2492.594640                                    | -0.019799                     | 369.025        | 238.369     | 23.284                                             | -2492.102455 |
|           | S cis                     | -2492.583607                                    | -0.025946                     | 369.424        | 239.758     | 23.542                                             | -2492.097182 |
|           | TS interchange mechanism  | -2649.707623                                    | -0.016881                     | 437.43         | 271.711     | 27.645                                             | -2649.112394 |
|           | P interchange mechanism   | -2649.738078                                    | -0.017778                     | 437.927        | 266.556     | 27.282                                             | -2649.141084 |
|           | TS dissociative mechanism | -2492.546060                                    | -0.019060                     | 368.137        | 237.663     | 23.074                                             | -2492.054551 |
|           | P dissociative mechanism  | -2492.556804                                    | -0.020538                     | 368.506        | 238.497     | 23.109                                             | -2492.066525 |
| <b>5b</b> | S trans                   | -2531.896078                                    | -0.019146                     | 386.341        | 246.448     | 24.429                                             | -2531.377657 |
|           | S cis                     | -2531.885036                                    | -0.025616                     | 386.729        | 247.835     | 24.663                                             | -2531.372753 |
|           | TS interchange mechanism  | -2689.009585                                    | -0.016259                     | 454.647        | 272.452     | 28.225                                             | -2688.385724 |
|           | P interchange mechanism   | -2689.038766                                    | -0.016886                     | 455.314        | 272.498     | 28.337                                             | -2688.414312 |
|           | TS dissociative mechanism | -2531.849232                                    | -0.018009                     | 385.535        | 245.878     | 24.216                                             | -2531.331028 |
|           | P dissociative mechanism  | -2531.857711                                    | -0.020082                     | 385.862        | 252.542     | 24.774                                             | -2531.343333 |

## Geometries in xyz format

```

73
2a - S
Ru1 12.851083 5.719468 5.245438
C12 10.806763 4.889928 6.161490
C13 15.078137 6.536857 4.995014
O4 13.775323 3.867898 5.941797
N5 11.823244 8.457105 5.560670
N6 11.414452 7.923403 3.556086
N7 11.980010 7.464937 4.674039
C8 12.348471 8.347413 6.898191
C9 11.495848 7.883897 7.912498
C10 12.059957 7.734674 9.174344
H11 11.435574 7.358789 9.985241
C12 13.393691 8.064529 9.431398
C13 14.164500 8.613078 8.407183
H14 15.189388 8.921436 8.611779
C15 13.658972 8.791285 7.122484
C16 10.030338 7.660091 7.697969
H17 9.661892 6.854895 8.339940
H18 9.780455 7.384079 6.669327
H19 9.477222 8.572293 7.960013

```

|              |           |           |           |               |           |           |           |
|--------------|-----------|-----------|-----------|---------------|-----------|-----------|-----------|
| C20          | 13.965463 | 7.855891  | 10.799536 | H27           | 14.217203 | 9.036520  | 5.035706  |
| H21          | 15.043910 | 8.037133  | 10.821430 | C28           | 11.499210 | 7.209139  | 2.356877  |
| H22          | 13.782851 | 6.832401  | 11.147812 | C29           | 10.523195 | 6.313175  | 1.901883  |
| H23          | 13.496541 | 8.527523  | 11.528745 | C30           | 10.740476 | 5.740215  | 0.651912  |
| C24          | 14.455608 | 9.520065  | 6.084490  | H31           | 10.009419 | 5.027675  | 0.268994  |
| H25          | 15.526219 | 9.350401  | 6.227885  | C32           | 11.862516 | 6.049248  | -0.119464 |
| H26          | 14.274067 | 10.600048 | 6.174266  | C33           | 12.789751 | 6.967480  | 0.374847  |
| H27          | 14.219365 | 9.212964  | 5.061689  | H34           | 13.670432 | 7.211430  | -0.219683 |
| C28          | 11.396293 | 7.198441  | 2.312925  | C35           | 12.631311 | 7.571040  | 1.617357  |
| C29          | 10.272989 | 6.411476  | 2.029157  | C36           | 9.308812  | 5.981507  | 2.713810  |
| C30          | 10.273192 | 5.752179  | 0.804087  | H37           | 8.770304  | 5.139171  | 2.271369  |
| H31          | 9.417688  | 5.129344  | 0.542669  | H38           | 8.607934  | 6.825962  | 2.754628  |
| C32          | 11.334928 | 5.871091  | -0.098098 | H39           | 9.565644  | 5.715233  | 3.749095  |
| C33          | 12.426592 | 6.671626  | 0.241099  | C40           | 12.060862 | 5.398112  | -1.453179 |
| H34          | 13.255679 | 6.770825  | -0.458891 | H41           | 13.073830 | 5.557866  | -1.835431 |
| C35          | 12.487756 | 7.356416  | 1.452953  | H42           | 11.357852 | 5.796939  | -2.194571 |
| C36          | 9.150066  | 6.260766  | 3.009249  | H43           | 11.882127 | 4.317595  | -1.395428 |
| H37          | 8.357865  | 5.631399  | 2.595130  | C44           | 13.645478 | 8.540070  | 2.144461  |
| H38          | 8.700187  | 7.227722  | 3.270677  | H45           | 14.342305 | 8.837065  | 1.355443  |
| H39          | 9.494805  | 5.795669  | 3.945537  | H46           | 14.235204 | 8.092410  | 2.957628  |
| C40          | 11.295847 | 5.137563  | -1.403576 | H47           | 13.180707 | 9.453079  | 2.540580  |
| H41          | 12.074235 | 5.485031  | -2.088885 | C48           | 12.790833 | 4.817503  | 3.800839  |
| H42          | 10.325955 | 5.258388  | -1.898322 | H49           | 11.890840 | 4.220084  | 3.598925  |
| H43          | 11.442379 | 4.061304  | -1.250961 | C50           | 16.384660 | 6.229291  | 5.053528  |
| C44          | 13.679460 | 8.181414  | 1.830010  | H51           | 16.991260 | 6.860832  | 4.386988  |
| H45          | 14.358697 | 8.290648  | 0.980416  | C52           | 16.154375 | 6.956597  | 6.350946  |
| H46          | 14.242969 | 7.714013  | 2.652678  | H53           | 15.720638 | 7.945788  | 6.185898  |
| H47          | 13.396321 | 9.190116  | 2.159122  | H54           | 17.117522 | 7.091600  | 6.855242  |
| C48          | 12.829465 | 4.736395  | 3.680729  | H55           | 15.500876 | 6.374475  | 7.011985  |
| H49          | 12.411735 | 5.086337  | 2.732611  | C56           | 17.022156 | 4.873394  | 5.259911  |
| C50          | 14.111566 | 3.510830  | 7.328286  | H57           | 17.214498 | 4.343501  | 4.322785  |
| H51          | 15.104110 | 3.041746  | 7.274310  | H58           | 16.377074 | 4.251552  | 5.889455  |
| C52          | 14.209391 | 4.803165  | 8.099154  | H59           | 17.983003 | 5.008238  | 5.768203  |
| H53          | 14.923660 | 5.492473  | 7.636211  | C60           | 15.059571 | 5.458262  | 3.174546  |
| H54          | 14.547461 | 4.581738  | 9.117865  | C61           | 16.105327 | 5.495069  | 2.260296  |
| H55          | 13.226014 | 5.289444  | 8.174712  | H62           | 17.017103 | 6.046760  | 2.468291  |
| C56          | 13.065766 | 2.566467  | 7.874011  | C63           | 15.986686 | 4.782838  | 1.069017  |
| H57          | 12.979111 | 1.649100  | 7.283319  | H64           | 16.814047 | 4.802510  | 0.363433  |
| H58          | 12.088580 | 3.061488  | 7.882902  | C65           | 14.844656 | 4.039120  | 0.773794  |
| H59          | 13.330832 | 2.284734  | 8.899031  | H66           | 14.784491 | 3.472096  | -0.151301 |
| C60          | 13.929797 | 2.973634  | 4.930525  | C67           | 13.791177 | 4.033873  | 1.670507  |
| C61          | 14.534379 | 1.730277  | 5.030425  | H68           | 12.878820 | 3.476861  | 1.461478  |
| H62          | 14.935188 | 1.361091  | 5.968654  | C69           | 13.877281 | 4.753412  | 2.874395  |
| C63          | 14.621461 | 0.948159  | 3.881127  | C70           | 10.616508 | 9.281378  | 5.132150  |
| H64          | 15.096749 | -0.027210 | 3.951199  | C71           | 10.462985 | 8.927309  | 3.827586  |
| C65          | 14.116702 | 1.379219  | 2.652992  | H72           | 10.184102 | 10.068318 | 5.733479  |
| H66          | 14.199655 | 0.741950  | 1.777687  | H73           | 9.866040  | 9.336169  | 3.025070  |
| C67          | 13.515071 | 2.620391  | 2.564228  | 85            |           |           |           |
| H68          | 13.115354 | 2.988620  | 1.620552  | 2a - TS inter |           |           |           |
| C69          | 13.415322 | 3.438035  | 3.702726  | C80           | 14.506412 | 3.753134  | 7.417706  |
| C70          | 11.166907 | 9.516698  | 5.019462  | C81           | 13.873194 | 4.550541  | 8.319458  |
| C71          | 10.903592 | 9.175542  | 3.730053  | H82           | 14.268778 | 5.565465  | 8.430170  |
| H72          | 10.957754 | 10.403225 | 5.600471  | C83           | 12.801265 | 4.150375  | 9.271978  |
| H73          | 10.413021 | 9.693062  | 2.917954  | H84           | 13.224928 | 4.037681  | 10.279195 |
| 73           |           |           |           | H85           | 12.020887 | 4.918251  | 9.328437  |
| 2a - S - cis |           |           |           | H86           | 12.319614 | 3.205479  | 9.002621  |
| Ru1          | 12.923506 | 5.775585  | 5.360150  | C87           | 14.274900 | 2.295634  | 7.220131  |
| C12          | 10.788910 | 5.063726  | 6.019600  | H88           | 13.283562 | 1.973594  | 7.554055  |
| C13          | 13.846706 | 4.177021  | 6.758809  | H89           | 14.404575 | 2.005416  | 6.170663  |
| O4           | 15.070368 | 6.096388  | 4.386365  | H90           | 15.020514 | 1.726174  | 7.791815  |
| N5           | 11.522048 | 8.409385  | 5.652030  | H91           | 15.346504 | 4.196647  | 6.879343  |
| N6           | 11.286195 | 7.859497  | 3.623338  | N1            | 11.505485 | 8.327553  | 5.616940  |
| N7           | 11.935734 | 7.526439  | 4.740399  | N2            | 11.282619 | 7.245661  | 3.802342  |
| C8           | 12.128387 | 8.444920  | 6.960435  | N3            | 11.947831 | 7.243932  | 4.966265  |
| C9           | 11.434332 | 7.955441  | 8.071970  | C4            | 12.080868 | 8.745723  | 6.875136  |
| C10          | 12.116354 | 7.993824  | 9.288533  | C5            | 11.403634 | 8.476295  | 8.070025  |
| H11          | 11.614699 | 7.600910  | 10.172763 | C6            | 12.051277 | 8.853867  | 9.246533  |
| C12          | 13.396083 | 8.527066  | 9.410823  | H7            | 11.557427 | 8.648844  | 10.196658 |
| C13          | 14.001905 | 9.091438  | 8.282606  | C8            | 13.278663 | 9.510438  | 9.240022  |
| H14          | 14.977677 | 9.567902  | 8.379715  | C9            | 13.854918 | 9.848525  | 8.012488  |
| C15          | 13.385194 | 9.070572  | 7.040999  | H10           | 14.786264 | 10.413925 | 7.996187  |
| C16          | 10.016061 | 7.478532  | 8.040099  | C11           | 13.274212 | 9.485063  | 6.806429  |
| H17          | 9.940197  | 6.475251  | 8.471384  | C12           | 10.010346 | 7.930764  | 8.144500  |
| H18          | 9.597977  | 7.418894  | 7.032948  | H13           | 9.937593  | 7.152236  | 8.911430  |
| H19          | 9.392998  | 8.149722  | 8.644257  | H14           | 9.665839  | 7.483537  | 7.210322  |
| C20          | 14.108524 | 8.508177  | 10.726760 | H15           | 9.320658  | 8.735823  | 8.430406  |
| H21          | 14.832568 | 9.325171  | 10.806707 | C16           | 13.965325 | 9.872894  | 10.519699 |
| H22          | 14.660299 | 7.567444  | 10.848093 | H17           | 14.410005 | 10.872366 | 10.466708 |
| H23          | 13.408794 | 8.582619  | 11.565107 | H18           | 14.781468 | 9.170631  | 10.728511 |
| C24          | 13.997042 | 9.743024  | 5.847283  | H19           | 13.279126 | 9.845994  | 11.371364 |
| H25          | 14.933926 | 10.237657 | 6.120019  | C20           | 13.882443 | 9.895521  | 5.500289  |
| H26          | 13.330967 | 10.512665 | 5.433284  | H21           | 14.621398 | 10.686224 | 5.657683  |



|              |           |           |           |            |           |           |           |
|--------------|-----------|-----------|-----------|------------|-----------|-----------|-----------|
| H22          | 13.132247 | 10.278226 | 4.795234  | H30        | 13.444964 | 7.369717  | 11.247722 |
| H23          | 14.401057 | 9.049098  | 5.033195  | H31        | 12.562000 | 8.854715  | 11.600274 |
| C24          | 11.538316 | 6.308232  | 2.736022  | C32        | 14.703487 | 9.318970  | 6.215580  |
| C25          | 10.683137 | 5.212119  | 2.572954  | H33        | 15.687667 | 8.917273  | 6.471122  |
| C26          | 10.985572 | 4.335505  | 1.533259  | H34        | 14.768021 | 10.414694 | 6.251010  |
| H27          | 10.347644 | 3.463297  | 1.385380  | H35        | 14.497373 | 9.018103  | 5.184846  |
| C28          | 12.070390 | 4.540768  | 0.681866  | C36        | 11.852923 | 6.865483  | 2.371682  |
| C29          | 12.848243 | 5.689922  | 0.847374  | C37        | 10.724562 | 6.113096  | 2.029551  |
| H30          | 13.675965 | 5.878452  | 0.163317  | C38        | 10.827485 | 5.330215  | 0.881729  |
| C31          | 12.602070 | 6.599369  | 1.869230  | H39        | 9.967569  | 4.734534  | 0.576970  |
| C32          | 9.512791  | 4.959315  | 3.467517  | C40        | 11.990529 | 5.291541  | 0.115070  |
| H33          | 8.802083  | 4.283489  | 2.982017  | C41        | 13.084756 | 6.068633  | 0.504658  |
| H34          | 8.975462  | 5.876457  | 3.735597  | H42        | 13.996688 | 6.045375  | -0.092476 |
| H35          | 9.845183  | 4.509577  | 4.413469  | C43        | 13.043036 | 6.882501  | 1.629510  |
| C36          | 12.414917 | 3.533785  | -0.370138 | C44        | 9.465343  | 6.143653  | 2.841030  |
| H37          | 12.921641 | 3.993757  | -1.224536 | H45        | 8.796894  | 5.333170  | 2.532867  |
| H38          | 11.527831 | 3.007030  | -0.735883 | H46        | 8.919025  | 7.087034  | 2.704557  |
| H39          | 13.096210 | 2.779019  | 0.048008  | H47        | 9.658270  | 6.022703  | 3.917136  |
| C40          | 13.464065 | 7.812001  | 2.055492  | C48        | 12.084320 | 4.429085  | -1.105416 |
| H41          | 14.115629 | 7.959348  | 1.189896  | H49        | 12.499371 | 4.982272  | -1.955431 |
| H42          | 14.110192 | 7.722805  | 2.941987  | H50        | 11.107520 | 4.032970  | -1.401632 |
| H43          | 12.872241 | 8.727639  | 2.183701  | H51        | 12.753913 | 3.578488  | -0.918454 |
| C44          | 10.572030 | 8.996858  | 4.888785  | C52        | 14.217771 | 7.716734  | 2.035211  |
| C45          | 10.432533 | 8.307722  | 3.724556  | H53        | 14.987676 | 7.702233  | 1.258873  |
| H46          | 9.828368  | 8.474101  | 2.844217  | H54        | 14.668988 | 7.340271  | 2.966321  |
| H47          | 10.114956 | 9.901615  | 5.263300  | H55        | 13.940727 | 8.766044  | 2.206106  |
| Ru48         | 12.938922 | 5.757982  | 5.913909  | C56        | 12.465951 | 4.485600  | 4.214050  |
| C149         | 10.787009 | 5.111993  | 6.699559  | H57        | 11.393423 | 4.253968  | 4.207645  |
| C150         | 15.124394 | 6.790389  | 6.023339  | C58        | 10.408656 | 1.471871  | 2.298913  |
| O51          | 11.942290 | 2.717398  | 5.042251  | H59        | 11.073147 | 0.596680  | 2.237787  |
| C52          | 13.579283 | 4.984692  | 4.343640  | C60        | 9.336242  | 1.226899  | 3.334979  |
| H53          | 14.127180 | 5.711068  | 3.728741  | H61        | 9.775473  | 0.982134  | 4.306922  |
| C54          | 11.083351 | 1.585068  | 5.350633  | H62        | 8.689109  | 0.399628  | 3.025755  |
| H55          | 11.736168 | 0.710466  | 5.496875  | H63        | 8.717407  | 2.124412  | 3.454480  |
| C56          | 10.367795 | 1.859515  | 6.650425  | C64        | 9.831239  | 1.806696  | 0.939512  |
| H57          | 11.069077 | 2.123872  | 7.448257  | H65        | 10.605586 | 2.076377  | 0.211570  |
| H58          | 9.823245  | 0.956430  | 6.948447  | H66        | 9.134500  | 2.649895  | 1.032603  |
| H59          | 9.654389  | 2.682589  | 6.548766  | H67        | 9.273141  | 0.951874  | 0.542381  |
| C60          | 10.104260 | 1.349126  | 4.216926  | C68        | 12.468068 | 2.746327  | 2.493384  |
| H61          | 10.597439 | 1.200770  | 3.250517  | C69        | 13.132483 | 1.984627  | 1.527540  |
| H62          | 9.427726  | 2.207543  | 4.131063  | H70        | 12.602453 | 1.226018  | 0.959874  |
| H63          | 9.495779  | 0.462701  | 4.426480  | C71        | 14.482608 | 2.195649  | 1.288141  |
| C64          | 12.928294 | 2.531076  | 4.158913  | H72        | 14.981583 | 1.589486  | 0.534471  |
| C65          | 13.225009 | 1.301963  | 3.550987  | C73        | 15.204714 | 3.160942  | 1.992614  |
| H66          | 12.649429 | 0.413506  | 3.782683  | H74        | 16.261738 | 3.310461  | 1.792393  |
| C67          | 14.269724 | 1.189832  | 2.644927  | C75        | 14.564316 | 3.914409  | 2.953888  |
| H68          | 14.477391 | 0.215598  | 2.207200  | H76        | 15.106475 | 4.667555  | 3.522448  |
| C69          | 15.040285 | 2.294397  | 2.281852  | C77        | 13.190545 | 3.742374  | 3.236555  |
| H70          | 15.853258 | 2.197554  | 1.568018  | C78        | 11.456605 | 9.566849  | 4.681776  |
| C71          | 14.740077 | 3.514116  | 2.850110  | C79        | 11.294494 | 9.047066  | 3.434242  |
| H72          | 15.318795 | 4.397387  | 2.582356  | H80        | 11.241612 | 10.537510 | 5.104649  |
| C73          | 13.714671 | 3.666267  | 3.814321  | H81        | 10.909823 | 9.460161  | 2.512820  |
| 85           |           |           |           | C82        | 12.545991 | 2.455751  | 6.471010  |
| 2a - P inter |           |           |           | H83        | 12.431094 | 2.006560  | 5.478513  |
| C1           | 13.558875 | 3.556642  | 6.461044  | H84        | 12.886697 | 1.663320  | 7.151109  |
| C2           | 13.677561 | 4.529879  | 7.432386  | H85        | 11.563860 | 2.799877  | 6.807519  |
| H3           | 14.626386 | 5.072316  | 7.452086  | H86        | 14.419464 | 3.428416  | 5.802297  |
| C4           | 12.821197 | 4.673672  | 8.646841  | 73         |           |           |           |
| H5           | 12.594161 | 5.728495  | 8.853822  | 2a - P dis |           |           |           |
| H6           | 11.875101 | 4.134647  | 8.574392  | Ru9        | 12.938911 | 5.814787  | 5.437873  |
| H7           | 13.383623 | 4.292562  | 9.511478  | C110       | 11.171131 | 4.929742  | 6.739592  |
| Ru9          | 12.850897 | 5.699299  | 5.622601  | C111       | 15.185355 | 6.452040  | 5.057661  |
| C110         | 10.554574 | 5.307728  | 6.348397  | O12        | 11.034772 | 2.703425  | 2.792102  |
| C111         | 15.182397 | 6.252150  | 5.235710  | N13        | 11.869420 | 8.508996  | 5.475574  |
| O12          | 11.177344 | 2.585707  | 2.801782  | N14        | 11.662801 | 7.767007  | 3.487548  |
| N13          | 12.002271 | 8.572217  | 5.430689  | N15        | 12.102132 | 7.428897  | 4.713095  |
| N14          | 11.756431 | 7.765548  | 3.494153  | C16        | 12.260303 | 8.526583  | 6.861428  |
| N15          | 12.184733 | 7.464067  | 4.716239  | C17        | 11.296371 | 8.182112  | 7.821164  |
| C16          | 12.339172 | 8.594655  | 6.833356  | C18        | 11.712279 | 8.177762  | 9.145518  |
| C17          | 11.297151 | 8.420243  | 7.758900  | H19        | 10.995571 | 7.902496  | 9.918567  |
| C18          | 11.660151 | 8.384480  | 9.099578  | C20        | 13.016861 | 8.520357  | 9.511137  |
| H19          | 10.881779 | 8.235876  | 9.847813  | C21        | 13.914460 | 8.917740  | 8.521164  |
| C20          | 12.987135 | 8.538458  | 9.511647  | H22        | 14.919580 | 9.231094  | 8.802299  |
| C21          | 13.966691 | 8.795652  | 8.553637  | C23        | 13.559610 | 8.948692  | 7.175052  |
| H22          | 14.993152 | 8.980466  | 8.869882  | C24        | 9.870606  | 7.907064  | 7.454226  |
| C23          | 13.667887 | 8.858261  | 7.193898  | H25        | 9.379200  | 7.318856  | 8.233834  |
| C24          | 9.856803  | 8.363992  | 7.351260  | H26        | 9.776470  | 7.342710  | 6.520836  |
| H25          | 9.270470  | 7.809226  | 8.088984  | H27        | 9.313506  | 8.848034  | 7.346666  |
| H26          | 9.706809  | 7.864826  | 6.389109  | C28        | 13.436465 | 8.464436  | 10.946704 |
| H27          | 9.440848  | 9.379681  | 7.293181  | H29        | 14.290651 | 9.118878  | 11.144598 |
| C28          | 13.340827 | 8.424811  | 10.961765 | H30        | 13.733472 | 7.444332  | 11.219969 |
| H29          | 14.288544 | 8.921563  | 11.189719 | H31        | 12.618158 | 8.751916  | 11.614870 |

|        |           |           |           |              |           |           |           |
|--------|-----------|-----------|-----------|--------------|-----------|-----------|-----------|
| C32    | 14.503261 | 9.515101  | 6.158125  | H31          | 9.446774  | 5.152992  | 0.589347  |
| H33    | 15.534905 | 9.232623  | 6.386571  | C32          | 11.380898 | 5.830997  | -0.070058 |
| H34    | 14.448263 | 10.611560 | 6.174464  | C33          | 12.492714 | 6.611459  | 0.249986  |
| H35    | 14.300160 | 9.177867  | 5.137193  | H34          | 13.326432 | 6.668146  | -0.449428 |
| C36    | 11.799664 | 6.929527  | 2.323972  | C35          | 12.569805 | 7.325324  | 1.444472  |
| C37    | 10.709334 | 6.134452  | 1.950750  | C36          | 9.215980  | 6.338032  | 3.032883  |
| C38    | 10.862809 | 5.358007  | 0.806947  | H37          | 8.368408  | 5.798423  | 2.601737  |
| H39    | 10.037965 | 4.720097  | 0.491325  | H38          | 8.851224  | 7.318510  | 3.367393  |
| C40    | 12.044036 | 5.364709  | 0.065062  | H39          | 9.540811  | 5.794339  | 3.933856  |
| C41    | 13.084149 | 6.208686  | 0.458882  | C40          | 11.323653 | 5.063734  | -1.355895 |
| H42    | 13.998943 | 6.241383  | -0.132742 | H41          | 12.119295 | 5.363534  | -2.044052 |
| C43    | 12.988191 | 7.019732  | 1.584304  | H42          | 10.362518 | 5.207684  | -1.861676 |
| C44    | 9.437344  | 6.104786  | 2.743921  | H43          | 11.427884 | 3.986697  | -1.174574 |
| H45    | 8.829069  | 5.241097  | 2.457131  | C44          | 13.787658 | 8.118563  | 1.808159  |
| H46    | 8.831511  | 7.004219  | 2.570323  | H45          | 14.466059 | 8.201813  | 0.954828  |
| H47    | 9.615324  | 6.038771  | 3.826330  | H46          | 14.339588 | 7.639696  | 2.632537  |
| C48    | 12.210502 | 4.465085  | -1.119664 | H47          | 13.539602 | 9.136852  | 2.136703  |
| H49    | 12.748913 | 4.962041  | -1.933501 | C48          | 12.828544 | 4.726771  | 3.687677  |
| H50    | 11.247133 | 4.117864  | -1.506580 | H49          | 12.415878 | 5.075524  | 2.737146  |
| H51    | 12.797964 | 3.580091  | -0.838497 | C50          | 14.076146 | 3.484502  | 7.338975  |
| C52    | 14.106144 | 7.932360  | 1.979166  | H51          | 15.061048 | 2.998600  | 7.290804  |
| H53    | 14.839045 | 8.014687  | 1.172044  | C52          | 14.192209 | 4.773780  | 8.112312  |
| H54    | 14.628492 | 7.556815  | 2.870549  | H53          | 14.916222 | 5.453317  | 7.649340  |
| H55    | 13.750361 | 8.945410  | 2.209017  | H54          | 14.527490 | 4.546283  | 9.130690  |
| C56    | 12.397236 | 4.668699  | 4.042751  | H55          | 13.215709 | 5.274102  | 8.186865  |
| H57    | 11.314305 | 4.634232  | 3.896594  | C56          | 13.011407 | 2.557238  | 7.878173  |
| C58    | 10.206566 | 1.609259  | 2.334181  | H57          | 12.916043 | 1.640294  | 7.288045  |
| H59    | 10.794897 | 0.683567  | 2.416070  | H58          | 12.041990 | 3.067802  | 7.876808  |
| C60    | 9.041546  | 1.553931  | 3.293210  | H59          | 13.262830 | 2.273222  | 8.906053  |
| H61    | 9.383354  | 1.389593  | 4.318931  | C60          | 13.900912 | 2.950493  | 4.943632  |
| H62    | 8.362484  | 0.741063  | 3.015950  | C61          | 14.490012 | 1.699594  | 5.047175  |
| H63    | 8.479635  | 2.495265  | 3.262571  | H62          | 14.882080 | 1.326028  | 5.987458  |
| C64    | 9.772697  | 1.848512  | 0.903000  | C63          | 14.573329 | 0.915286  | 3.898995  |
| H65    | 10.623800 | 2.010797  | 0.230912  | H64          | 15.036737 | -0.065619 | 3.972025  |
| H66    | 9.119729  | 2.729603  | 0.853348  | C65          | 14.079512 | 1.351806  | 2.668803  |
| H67    | 9.202948  | 0.990567  | 0.530203  | H66          | 14.159181 | 0.713675  | 1.793757  |
| C68    | 12.352000 | 2.708241  | 2.580853  | C67          | 13.492554 | 2.600195  | 2.577313  |
| C69    | 13.015853 | 1.796500  | 1.756132  | H68          | 13.102012 | 2.972927  | 1.631554  |
| H70    | 12.465736 | 1.030105  | 1.219592  | C69          | 13.397415 | 3.419562  | 3.714010  |
| C71    | 14.395469 | 1.864195  | 1.621139  | C70          | 11.313321 | 9.602355  | 4.975170  |
| H72    | 14.892524 | 1.142524  | 0.976084  | C71          | 11.050538 | 9.260111  | 3.674118  |
| C73    | 15.152444 | 2.828190  | 2.292482  | C72          | 11.064822 | 10.838965 | 5.748671  |
| H74    | 16.230921 | 2.861809  | 2.170694  | H73          | 10.602599 | 11.598824 | 5.114028  |
| C75    | 14.514797 | 3.730372  | 3.114259  | H74          | 10.396394 | 10.646632 | 6.595737  |
| H76    | 15.079288 | 4.496724  | 3.640951  | H75          | 11.999177 | 11.247515 | 6.149833  |
| C77    | 13.109374 | 3.713000  | 3.275767  | C76          | 10.423909 | 10.005188 | 2.558607  |
| C78    | 11.277823 | 9.503240  | 4.457713  | H77          | 10.138065 | 11.007254 | 2.887175  |
| C79    | 11.142056 | 9.030665  | 3.791854  | H78          | 11.111593 | 10.104203 | 1.710936  |
| H80    | 11.018598 | 10.445255 | 5.218807  | H79          | 9.525520  | 9.494850  | 2.192984  |
| H81    | 10.737692 | 9.465044  | 2.588849  | 79           |           |           |           |
| 2b - s |           |           |           | 2b - s - cis |           |           |           |
| Ru1    | 12.865425 | 5.718790  | 5.243837  | Ru1          | 12.912657 | 5.771867  | 5.363952  |
| C12    | 10.797098 | 4.947070  | 6.163949  | C12          | 10.741847 | 5.143056  | 5.986832  |
| C13    | 15.111568 | 6.491562  | 4.990465  | C13          | 13.749659 | 4.171066  | 6.818083  |
| O4     | 13.752712 | 3.848241  | 5.952954  | O4           | 15.107032 | 6.008194  | 4.423310  |
| N5     | 11.914842 | 8.506516  | 5.527381  | N5           | 11.673754 | 8.499840  | 5.603451  |
| N6     | 11.511571 | 7.976422  | 3.529203  | N6           | 11.417630 | 7.959187  | 3.582061  |
| N7     | 12.040857 | 7.502950  | 4.654629  | N7           | 12.018051 | 7.577841  | 4.707042  |
| C8     | 12.418173 | 8.372889  | 6.870123  | C8           | 12.281756 | 8.485423  | 6.911183  |
| C9     | 11.542006 | 7.919953  | 7.870645  | C9           | 11.566080 | 8.024613  | 8.020171  |
| C10    | 12.086136 | 7.732015  | 9.136285  | C10          | 12.250510 | 8.010355  | 9.237180  |
| H11    | 11.441076 | 7.358460  | 9.932171  | H11          | 11.729478 | 7.633040  | 10.116940 |
| C12    | 13.426501 | 8.012491  | 9.413561  | C12          | 13.556947 | 8.470857  | 9.362395  |
| C13    | 14.225740 | 8.551207  | 8.406701  | C13          | 14.192857 | 9.009087  | 8.237263  |
| H14    | 15.259652 | 8.817414  | 8.625549  | H14          | 15.197442 | 9.421261  | 8.336921  |
| C15    | 13.741709 | 8.765130  | 7.118780  | C15          | 13.576374 | 9.031005  | 6.996191  |
| C16    | 10.072896 | 7.728726  | 7.643418  | C16          | 10.125496 | 7.621259  | 7.983070  |
| H17    | 9.711820  | 6.836837  | 8.163437  | H17          | 10.000097 | 6.609795  | 8.382516  |
| H18    | 9.808407  | 7.606156  | 6.588543  | H18          | 9.703625  | 7.612532  | 6.975010  |
| H19    | 9.522594  | 8.590811  | 8.045059  | H19          | 9.538977  | 8.303667  | 8.611605  |
| C20    | 13.977451 | 7.756242  | 10.782537 | C20          | 14.278595 | 8.403398  | 10.671933 |
| H21    | 15.064945 | 7.871057  | 10.810705 | H21          | 14.919656 | 9.278644  | 10.822620 |
| H22    | 13.731428 | 6.742230  | 11.119365 | H22          | 14.925793 | 7.517828  | 10.705547 |
| H23    | 13.547624 | 8.447659  | 11.517329 | H23          | 13.585252 | 8.333246  | 11.515208 |
| C24    | 14.592073 | 9.465317  | 6.102903  | C24          | 14.240756 | 9.643334  | 5.798218  |
| H25    | 15.629693 | 9.126300  | 6.166626  | H25          | 15.194256 | 10.102316 | 6.076407  |
| H26    | 14.583847 | 10.546760 | 6.297998  | H26          | 13.621580 | 10.428196 | 5.341813  |
| H27    | 14.266565 | 9.296954  | 5.071862  | H27          | 14.444495 | 8.899017  | 5.016083  |
| C28    | 11.474019 | 7.221753  | 2.307112  | C28          | 11.604546 | 7.271622  | 2.331782  |
| C29    | 10.333594 | 6.453298  | 2.041684  | C29          | 10.602142 | 6.399218  | 1.887457  |
| C30    | 10.316419 | 5.763009  | 0.833880  | C30          | 10.803970 | 5.797862  | 0.648093  |
|        |           |           |           | H31          | 10.050636 | 5.103256  | 0.275263  |

|               |           |           |           |
|---------------|-----------|-----------|-----------|
| C32           | 11.938164 | 6.054199  | -0.124931 |
| C33           | 12.895547 | 6.945950  | 0.358316  |
| H34           | 13.788838 | 7.145495  | -0.234003 |
| C35           | 12.752725 | 7.575152  | 1.590550  |
| C36           | 9.380274  | 6.110207  | 2.703784  |
| H37           | 8.782795  | 5.323605  | 2.235294  |
| H38           | 8.734107  | 6.993022  | 2.800526  |
| H39           | 9.636554  | 5.783907  | 3.721945  |
| C40           | 12.118977 | 5.369917  | -1.444833 |
| H41           | 13.124318 | 5.526111  | -1.848110 |
| H42           | 11.399812 | 5.741292  | -2.184857 |
| H43           | 11.950993 | 4.289669  | -1.354217 |
| C44           | 13.806039 | 8.506109  | 2.110613  |
| H45           | 14.517559 | 8.765588  | 1.321394  |
| H46           | 14.373394 | 8.038871  | 2.928660  |
| H47           | 13.383098 | 9.441803  | 2.501407  |
| C48           | 12.782155 | 4.804235  | 3.813796  |
| H49           | 11.870925 | 4.227149  | 3.602368  |
| C50           | 16.417737 | 6.036963  | 5.111172  |
| H51           | 17.079734 | 6.629442  | 4.461855  |
| C52           | 16.227628 | 6.764409  | 6.415097  |
| H53           | 15.879797 | 7.788165  | 6.258106  |
| H54           | 17.191585 | 6.812963  | 6.933699  |
| H55           | 15.518637 | 6.229623  | 7.058538  |
| C56           | 16.952632 | 4.635681  | 5.307591  |
| H57           | 17.122149 | 4.107309  | 4.365138  |
| H58           | 16.254284 | 4.053374  | 5.917935  |
| H59           | 17.912258 | 4.693542  | 5.832549  |
| C60           | 15.078466 | 5.376060  | 3.207540  |
| C61           | 16.132210 | 5.380679  | 2.301387  |
| H62           | 17.059727 | 5.901588  | 2.519905  |
| C63           | 16.002484 | 4.674807  | 1.107657  |
| H64           | 16.836169 | 4.669311  | 0.409290  |
| C65           | 14.840257 | 3.967637  | 0.802871  |
| H66           | 14.769568 | 3.403185  | -0.123126 |
| C67           | 13.780153 | 3.994477  | 1.691851  |
| H68           | 12.852919 | 3.465594  | 1.475087  |
| C69           | 13.877446 | 4.709793  | 2.896881  |
| C70           | 10.872899 | 9.470638  | 5.067020  |
| C71           | 10.706461 | 9.120995  | 3.750263  |
| C72           | 10.380157 | 10.617278 | 5.862195  |
| H73           | 9.930750  | 11.370398 | 5.210398  |
| H74           | 9.622034  | 10.298003 | 6.586943  |
| H75           | 11.196864 | 11.086067 | 6.422827  |
| C76           | 9.993579  | 9.785503  | 2.635844  |
| H77           | 9.582267  | 10.742199 | 2.966885  |
| H78           | 10.669940 | 9.972489  | 1.793661  |
| H79           | 9.166089  | 9.171673  | 2.262156  |
| 91            |           |           |           |
| 2b - TS inter |           |           |           |
| C1            | 14.433875 | 3.726913  | 7.466427  |
| C2            | 13.739593 | 4.464177  | 8.373489  |
| H3            | 14.090631 | 5.488343  | 8.536462  |
| C4            | 12.650759 | 3.985086  | 9.269115  |
| H5            | 13.037632 | 3.861639  | 10.289801 |
| H6            | 11.831768 | 4.712689  | 9.314130  |
| H7            | 12.227771 | 3.026866  | 8.952298  |
| C8            | 14.260660 | 2.270370  | 7.205393  |
| H9            | 13.252180 | 1.915590  | 7.441366  |
| H10           | 14.485192 | 2.018571  | 6.162060  |
| H11           | 14.968281 | 1.698852  | 7.821562  |
| H12           | 15.275607 | 4.221030  | 6.976758  |
| N13           | 11.411093 | 8.327060  | 5.716638  |
| N14           | 11.298652 | 7.337819  | 3.850576  |
| N15           | 11.880534 | 7.268561  | 5.051590  |
| C16           | 11.914494 | 8.666122  | 7.026789  |
| C17           | 11.193712 | 8.297555  | 8.168033  |
| C18           | 11.787180 | 8.585327  | 9.397566  |
| H19           | 11.258605 | 8.297016  | 10.306706 |
| C20           | 13.004329 | 9.253464  | 9.495271  |
| C21           | 13.620591 | 9.702380  | 8.324069  |
| H22           | 14.543881 | 10.277612 | 8.391515  |
| C23           | 13.095591 | 9.427635  | 7.070086  |
| C24           | 9.808213  | 7.726961  | 8.142774  |
| H25           | 9.747903  | 6.811488  | 8.740524  |
| H26           | 9.461865  | 7.466185  | 7.139565  |
| H27           | 9.111894  | 8.453113  | 8.582703  |
| C28           | 13.639116 | 9.510416  | 10.826681 |
| H29           | 14.053585 | 10.522635 | 10.884831 |
| H30           | 14.470644 | 8.814971  | 10.995567 |
| H31           | 12.927962 | 9.382201  | 11.648116 |
| C32           | 13.764128 | 9.937003  | 5.829882  |
| H33           | 14.420119 | 10.778507 | 6.070193  |
| H34           | 13.046508 | 10.278771 | 5.072273  |
| H35           | 14.384265 | 9.149193  | 5.383937  |
| C36           | 11.610719 | 6.425794  | 2.779741  |
| C37           | 10.777830 | 5.323703  | 2.555681  |
| C38           | 11.134033 | 4.472861  | 1.510897  |
| H39           | 10.510430 | 3.596182  | 1.318167  |
| C40           | 12.253725 | 4.706343  | 0.715138  |
| C41           | 13.015441 | 5.855597  | 0.943245  |
| H42           | 13.876770 | 6.060688  | 0.307016  |
| C43           | 12.715637 | 6.739206  | 1.972907  |
| C44           | 9.580221  | 5.027247  | 3.399818  |
| H45           | 8.847671  | 4.442780  | 2.833894  |
| H46           | 9.084058  | 5.929355  | 3.776756  |
| H47           | 9.879592  | 4.457016  | 4.290439  |
| C48           | 12.659854 | 3.724086  | -0.338067 |
| H49           | 13.191798 | 4.207267  | -1.163910 |
| H50           | 11.799946 | 3.184884  | -0.747572 |
| H51           | 13.339275 | 2.978019  | 0.097280  |
| C52           | 13.572880 | 7.940811  | 2.239848  |
| H53           | 14.254983 | 8.122850  | 1.404754  |
| H54           | 14.186969 | 7.808764  | 3.144024  |
| H55           | 12.982771 | 8.854157  | 2.392147  |
| C56           | 10.548745 | 9.068793  | 4.957341  |
| C57           | 10.479362 | 8.431352  | 3.744618  |
| Ru58          | 12.854385 | 5.738011  | 5.983677  |
| C159          | 10.688508 | 5.013943  | 6.654395  |
| C160          | 15.011861 | 6.827535  | 6.203086  |
| O61           | 11.985049 | 2.699108  | 4.979913  |
| C62           | 13.582466 | 5.032524  | 4.423836  |
| H63           | 14.134447 | 5.790365  | 3.851923  |
| C64           | 11.132838 | 1.543028  | 5.195884  |
| H65           | 11.791106 | 0.672589  | 5.342913  |
| C66           | 10.344760 | 1.753881  | 6.465048  |
| H67           | 10.998777 | 2.000393  | 7.307826  |
| H68           | 9.803803  | 0.830433  | 6.700402  |
| H69           | 9.622145  | 2.568003  | 6.357130  |
| C70           | 10.223556 | 1.341328  | 3.999151  |
| H71           | 10.775640 | 1.226237  | 3.060273  |
| H72           | 9.551025  | 2.202112  | 3.900066  |
| H73           | 9.606513  | 0.447472  | 4.141501  |
| C74           | 13.019446 | 2.564405  | 4.142482  |
| C75           | 13.383983 | 1.360637  | 3.521056  |
| H76           | 12.821820 | 0.451018  | 3.696444  |
| C77           | 14.484198 | 1.299936  | 2.678403  |
| H78           | 14.745692 | 0.343441  | 2.230985  |
| C79           | 15.243499 | 2.433342  | 2.391490  |
| H80           | 16.101293 | 2.376815  | 1.727791  |
| C81           | 14.873605 | 3.630422  | 2.967798  |
| H82           | 15.441579 | 4.535952  | 2.757023  |
| C83           | 13.787846 | 3.729936  | 3.869460  |
| C84           | 9.912896  | 10.303484 | 5.468409  |
| H85           | 9.369812  | 10.812672 | 4.668554  |
| H86           | 9.204541  | 10.077841 | 6.273873  |
| H87           | 10.663071 | 10.993019 | 5.871861  |
| C88           | 9.748082  | 8.753490  | 2.498407  |
| H89           | 9.194707  | 9.687633  | 2.618180  |
| H90           | 10.436458 | 8.865764  | 1.652594  |
| H91           | 9.034085  | 7.963837  | 2.237792  |
| 91            |           |           |           |
| 2b - P inter  |           |           |           |
| C1            | 13.765289 | 3.575270  | 5.708537  |
| C2            | 13.890628 | 4.419080  | 6.794692  |
| H3            | 14.781655 | 5.052734  | 6.807520  |
| C4            | 13.168173 | 4.284864  | 8.094780  |
| H5            | 12.863880 | 5.264245  | 8.487201  |
| H6            | 12.277252 | 3.657125  | 8.031509  |
| H7            | 13.860855 | 3.845340  | 8.827483  |
| Ru9           | 12.794828 | 5.725544  | 5.249890  |
| C110          | 10.641072 | 5.052296  | 6.163982  |
| C111          | 15.025041 | 6.525346  | 4.695026  |
| O12           | 11.102741 | 2.771115  | 2.263388  |
| N13           | 11.900656 | 8.590659  | 5.498974  |
| N14           | 11.436859 | 8.033705  | 3.523240  |
| N15           | 11.963625 | 7.573104  | 4.649449  |
| C16           | 12.361709 | 8.414429  | 6.853821  |
| C17           | 11.424875 | 8.008935  | 7.818617  |
| C18           | 11.909100 | 7.781459  | 9.101546  |
| H19           | 11.211862 | 7.451519  | 9.871938  |
| C20           | 13.254919 | 7.965961  | 9.427342  |
| C21           | 14.125292 | 8.448234  | 8.450728  |
| H22           | 15.165119 | 8.648863  | 8.708904  |

|            |           |           |           |        |           |           |           |
|------------|-----------|-----------|-----------|--------|-----------|-----------|-----------|
| C23        | 13.701054 | 8.707807  | 7.149212  | H11    | 11.077935 | 7.681703  | 9.860610  |
| C24        | 9.957183  | 7.904783  | 7.537617  | C12    | 13.044799 | 8.436513  | 9.420835  |
| H25        | 9.523968  | 7.051270  | 8.066199  | C13    | 13.879987 | 8.944989  | 8.425672  |
| H26        | 9.726767  | 7.764798  | 6.477087  | H14    | 14.874000 | 9.304278  | 8.690984  |
| H27        | 9.447221  | 8.810711  | 7.893103  | C15    | 13.474046 | 9.026450  | 7.096911  |
| C28        | 13.746791 | 7.640850  | 10.803588 | C16    | 9.861320  | 7.760980  | 7.447868  |
| H29        | 14.676460 | 8.167533  | 11.038886 | H17    | 9.474227  | 7.002670  | 8.133869  |
| H30        | 13.946841 | 6.564780  | 10.893363 | H18    | 9.731756  | 7.370570  | 6.433605  |
| H31        | 13.003060 | 7.893264  | 11.566632 | H19    | 9.235575  | 8.658295  | 7.554481  |
| C32        | 14.629277 | 9.369400  | 6.177624  | C20    | 13.523764 | 8.319933  | 10.834228 |
| H33        | 15.621357 | 8.910556  | 6.212699  | H21    | 14.343127 | 9.014524  | 11.042854 |
| H34        | 14.741671 | 10.428210 | 6.447445  | H22    | 13.894604 | 7.306153  | 11.030308 |
| H35        | 14.290283 | 9.307882  | 5.139058  | H23    | 12.716687 | 8.511805  | 11.548755 |
| C36        | 11.332893 | 7.228361  | 2.333913  | C24    | 14.333840 | 9.710645  | 6.077984  |
| C37        | 10.155556 | 6.498677  | 2.133413  | H25    | 15.394070 | 9.541449  | 6.286586  |
| C38        | 10.058941 | 5.789402  | 0.936958  | H26    | 14.157071 | 10.794606 | 6.114281  |
| H39        | 9.154733  | 5.211868  | 0.743426  | H27    | 14.152976 | 9.366727  | 5.054740  |
| C40        | 11.077934 | 5.806774  | -0.014266 | C28    | 11.680802 | 6.941885  | 2.298673  |
| C41        | 12.229918 | 6.556131  | 0.240030  | C29    | 10.636306 | 6.053233  | 2.013749  |
| H42        | 13.032429 | 6.568409  | -0.498389 | C30    | 10.769687 | 5.275308  | 0.867740  |
| C43        | 12.385306 | 7.289089  | 1.410189  | H31    | 9.977584  | 4.570183  | 0.617535  |
| C44        | 9.059083  | 6.467808  | 3.153328  | C32    | 11.888027 | 5.367483  | 0.039248  |
| H45        | 8.185648  | 5.936190  | 2.765550  | C33    | 12.887896 | 6.289335  | 0.355759  |
| H46        | 8.731773  | 7.476591  | 3.440828  | H34    | 13.757722 | 6.378465  | -0.295390 |
| H47        | 9.382365  | 5.961622  | 4.076818  | C35    | 12.808351 | 7.103876  | 1.480230  |
| C48        | 10.957060 | 5.045599  | -1.299136 | C36    | 9.433461  | 5.926433  | 2.900831  |
| H49        | 11.132170 | 5.696736  | -2.163503 | H37    | 8.847769  | 5.044056  | 2.623404  |
| H50        | 9.967923  | 4.590369  | -1.413412 | H38    | 8.769351  | 6.797818  | 2.819963  |
| H51        | 11.710364 | 4.246807  | -1.344557 | H39    | 9.702209  | 5.822223  | 3.961247  |
| C52        | 13.625674 | 8.083839  | 1.681846  | C40    | 12.033173 | 4.479365  | -1.157395 |
| H53        | 14.317268 | 8.019949  | 0.836743  | H41    | 12.457731 | 5.017670  | -2.011503 |
| H54        | 14.151159 | 7.714852  | 2.576145  | H42    | 11.073828 | 4.050638  | -1.464896 |
| H55        | 13.408728 | 9.147940  | 1.850566  | H43    | 12.715002 | 3.647822  | -0.929230 |
| C56        | 12.350911 | 4.643917  | 3.756047  | C44    | 13.892995 | 8.082846  | 1.805625  |
| H57        | 11.320699 | 4.277335  | 3.851161  | H45    | 14.566863 | 8.210947  | 0.953967  |
| C58        | 10.425950 | 1.609677  | 1.737932  | H46    | 14.491071 | 7.736291  | 2.661568  |
| H59        | 11.185309 | 0.845439  | 1.511304  | H47    | 13.498486 | 9.072950  | 2.070695  |
| C60        | 9.534874  | 1.124660  | 2.857730  | C48    | 12.534123 | 4.700151  | 3.984240  |
| H61        | 10.122104 | 0.872892  | 3.746293  | H49    | 11.460955 | 4.487216  | 3.957276  |
| H62        | 8.979190  | 0.235150  | 2.543542  | C50    | 10.637784 | 1.421018  | 2.330992  |
| H63        | 8.814454  | 1.904311  | 3.131597  | H51    | 11.350023 | 0.582925  | 2.307279  |
| C64        | 9.643873  | 1.978441  | 0.494744  | C52    | 9.587322  | 1.163985  | 3.385327  |
| H65        | 10.284519 | 2.383719  | -0.296515 | H53    | 10.043675 | 1.002555  | 4.365938  |
| H66        | 8.887333  | 2.733065  | 0.744276  | H54    | 8.997654  | 0.279422  | 3.123231  |
| H67        | 9.126554  | 1.098794  | 0.096632  | H55    | 8.907470  | 2.021469  | 3.458190  |
| C68        | 12.316608 | 3.128196  | 1.832107  | C56    | 10.036132 | 1.658885  | 0.961347  |
| C69        | 12.931471 | 2.565057  | 0.709130  | H57    | 10.786933 | 1.955140  | 0.219241  |
| H70        | 12.421221 | 1.809311  | 0.120061  | H58    | 9.277287  | 2.449978  | 1.021750  |
| C71        | 14.206387 | 2.968938  | 0.341024  | H59    | 9.542318  | 0.749904  | 0.601235  |
| H72        | 14.667047 | 2.516080  | -0.534801 | C60    | 12.619591 | 2.815266  | 2.426180  |
| C73        | 14.902051 | 3.932891  | 1.072904  | C61    | 13.315991 | 2.039139  | 1.495438  |
| H74        | 15.902325 | 4.233533  | 0.774378  | H62    | 12.830563 | 1.210601  | 0.989513  |
| C75        | 14.311719 | 4.488032  | 2.188900  | C63    | 14.645600 | 2.321706  | 1.216621  |
| H76        | 14.840945 | 5.228933  | 2.784122  | H64    | 15.170258 | 1.701914  | 0.492139  |
| C77        | 13.013403 | 4.118069  | 2.605128  | C65    | 15.318756 | 3.372425  | 1.845464  |
| C78        | 11.341587 | 9.702798  | 4.933584  | H66    | 16.360246 | 3.574068  | 1.613155  |
| C79        | 11.036555 | 9.340963  | 3.644630  | C67    | 14.649848 | 4.140366  | 2.772807  |
| C82        | 12.867138 | 2.378524  | 5.664338  | H68    | 15.152147 | 4.961768  | 3.279375  |
| H83        | 12.718573 | 2.025100  | 4.638253  | C69    | 13.290072 | 3.905074  | 3.083139  |
| H84        | 13.334040 | 1.559766  | 6.228542  | C70    | 11.121167 | 9.521530  | 4.730736  |
| H85        | 11.885670 | 2.582131  | 6.103867  | C71    | 10.973918 | 9.042195  | 3.455356  |
| H86        | 14.561571 | 3.624290  | 4.964084  | C72    | 10.358163 | 9.645018  | 2.251779  |
| C86        | 11.164485 | 10.965220 | 5.685358  | C73    | 10.714890 | 10.805926 | 5.348197  |
| H87        | 10.824984 | 11.762601 | 5.019686  | H74    | 11.223087 | 11.650171 | 4.869379  |
| H88        | 10.424292 | 10.848708 | 6.485673  | H75    | 9.635111  | 10.962381 | 5.250597  |
| H89        | 12.106415 | 11.280698 | 6.147701  | H76    | 10.966853 | 10.816310 | 6.412849  |
| C89        | 10.415566 | 10.087543 | 2.526786  | H77    | 9.915523  | 10.611871 | 2.505721  |
| H90        | 10.182879 | 11.109191 | 2.837463  | H78    | 11.098901 | 9.804664  | 1.459231  |
| H91        | 11.084515 | 10.135301 | 1.659761  | H79    | 9.571602  | 9.003377  | 1.838656  |
| H92        | 9.485815  | 9.609542  | 2.197307  | 83     |           |           |           |
| 79         |           |           |           | 2c - s |           |           |           |
| 2b - P dis |           |           |           | Ru1    | 12.882959 | 5.738961  | 5.239300  |
| Ru1        | 13.019889 | 5.911898  | 5.350260  | C12    | 10.817718 | 4.947573  | 6.138645  |
| C12        | 11.284894 | 4.924266  | 6.646130  | C13    | 15.141548 | 6.466944  | 5.002366  |
| C13        | 15.192823 | 6.747264  | 4.871370  | O      | 13.750571 | 3.856749  | 5.954172  |
| O4         | 11.350184 | 2.598173  | 2.774617  | N5     | 11.960817 | 8.483090  | 5.540861  |
| N5         | 11.771845 | 8.537279  | 5.423870  | N6     | 11.548824 | 7.944397  | 3.512511  |
| N6         | 11.553097 | 7.797353  | 3.446432  | N7     | 12.081205 | 7.485107  | 4.649915  |
| N7         | 12.038096 | 7.477528  | 4.652219  | C10    | 12.472006 | 8.355251  | 6.878057  |
| C8         | 12.193816 | 8.535670  | 6.800393  | C11    | 11.595483 | 7.929330  | 7.891079  |
| C9         | 11.286236 | 8.089297  | 7.772221  | C12    | 12.140771 | 7.770327  | 9.160090  |
| C10        | 11.749387 | 8.040667  | 9.081076  | H13    | 11.496345 | 7.420247  | 9.967015  |

|     |           |           |           |     |            |           |           |
|-----|-----------|-----------|-----------|-----|------------|-----------|-----------|
| C14 | 13.481065 | 8.061344  | 9.429818  | C15 | 14.268897  | 9.109634  | 8.250292  |
| C15 | 14.277618 | 8.583593  | 8.411649  | H16 | 15.265951  | 9.541126  | 8.343705  |
| H16 | 15.307767 | 8.866729  | 8.626912  | C17 | 13.656125  | 9.094668  | 7.007878  |
| C17 | 13.790955 | 8.768046  | 7.120065  | C18 | 10.214559  | 7.681297  | 8.020008  |
| C18 | 10.124376 | 7.758768  | 7.664182  | H19 | 10.104624  | 6.637821  | 8.333089  |
| H19 | 9.717131  | 6.978810  | 8.314198  | H20 | 9.758370   | 7.764423  | 7.031000  |
| H20 | 9.875378  | 7.480846  | 6.635824  | H21 | 9.647605   | 8.304184  | 8.722287  |
| H21 | 9.604649  | 8.696724  | 7.904557  | C22 | 14.344046  | 8.581774  | 10.703710 |
| C22 | 14.032605 | 7.839423  | 10.804590 | H23 | 14.967526  | 9.473298  | 10.832313 |
| H23 | 15.110591 | 8.020906  | 10.844892 | H24 | 15.007354  | 7.710195  | 10.771622 |
| H24 | 13.846610 | 6.811479  | 11.138507 | H25 | 13.644000  | 8.525794  | 11.542616 |
| H25 | 13.551728 | 8.501322  | 11.534930 | C26 | 14.305456  | 9.713846  | 5.805728  |
| C26 | 14.618690 | 9.474050  | 6.090423  | H27 | 15.276884  | 10.143837 | 6.067940  |
| H27 | 15.682017 | 9.263114  | 6.235284  | H28 | 13.690518  | 10.524207 | 5.389693  |
| H28 | 14.476402 | 10.559564 | 6.188072  | H29 | 14.469143  | 8.986529  | 4.999127  |
| H29 | 14.371420 | 9.187211  | 5.064251  | C30 | 11.720688  | 7.317706  | 2.311417  |
| C30 | 11.514771 | 7.210372  | 2.280846  | C31 | 10.690495  | 6.501214  | 1.823463  |
| C31 | 10.363249 | 6.467478  | 1.989306  | C32 | 10.896340  | 5.911643  | 0.578920  |
| C32 | 10.342416 | 5.805483  | 0.766008  | H33 | 10.121562  | 5.260081  | 0.173912  |
| H33 | 9.464240  | 5.216216  | 0.501609  | C34 | 12.060901  | 6.129499  | -0.159808 |
| C34 | 11.410928 | 5.882884  | -0.132565 | C35 | 13.041454  | 6.975219  | 0.359814  |
| C35 | 12.528566 | 6.646697  | 0.207234  | H36 | 13.953808  | 7.151047  | -0.210674 |
| H36 | 13.361266 | 6.717869  | -0.492219 | C37 | 12.893653  | 7.592477  | 1.596755  |
| C37 | 12.608899 | 7.332209  | 1.417807  | C38 | 9.430433   | 6.270968  | 2.598964  |
| C38 | 9.230353  | 6.368262  | 2.964493  | H39 | 8.812491   | 5.510900  | 2.113509  |
| H39 | 8.403918  | 5.790381  | 2.541975  | H40 | 8.829373   | 7.187431  | 2.667667  |
| H40 | 8.839312  | 7.357829  | 3.236555  | H41 | 9.636148   | 5.940191  | 3.626805  |
| H41 | 9.545761  | 5.874943  | 3.896496  | C42 | 12.246659  | 5.461592  | -1.487179 |
| C42 | 11.348057 | 5.149813  | -1.437728 | H43 | 13.279750  | 5.541546  | -1.839617 |
| H43 | 12.150338 | 5.456487  | -2.115358 | H44 | 11.598719  | 5.911408  | -2.249235 |
| H44 | 10.390611 | 5.320757  | -1.942433 | H45 | 11.983555  | 4.398200  | -1.434555 |
| H45 | 11.436473 | 4.066941  | -1.284476 | C46 | 13.960721  | 8.487549  | 2.148514  |
| C46 | 13.820124 | 8.129001  | 1.794114  | H47 | 14.707616  | 8.716844  | 1.382988  |
| H47 | 14.514989 | 8.199855  | 0.952910  | H48 | 14.482812  | 8.009024  | 2.989937  |
| H48 | 14.357638 | 7.665638  | 2.636017  | H49 | 13.551976  | 9.439530  | 2.513710  |
| H49 | 13.558231 | 9.151944  | 2.096412  | C50 | 12.766070  | 4.859255  | 3.774425  |
| C50 | 12.847883 | 4.743483  | 3.680075  | H51 | 11.827108  | 4.338655  | 3.541602  |
| H51 | 12.446646 | 5.098528  | 2.727739  | C52 | 16.427311  | 5.992415  | 5.137523  |
| C52 | 14.070041 | 3.492318  | 7.343222  | H53 | 17.099001  | 6.567471  | 4.482276  |
| H53 | 15.051459 | 2.999545  | 7.295220  | C54 | 16.206806  | 6.757561  | 6.414564  |
| C54 | 14.193808 | 4.781764  | 8.114985  | H55 | 15.852429  | 7.771945  | 6.217754  |
| H55 | 14.926963 | 5.454213  | 7.656607  | H56 | 17.158287  | 6.831249  | 6.952612  |
| H56 | 14.520975 | 4.551927  | 9.135459  | H57 | 15.488673  | 6.237559  | 7.060590  |
| H57 | 13.221904 | 5.291419  | 8.185119  | C58 | 16.958447  | 4.598123  | 5.385705  |
| C58 | 12.998671 | 2.573130  | 7.882697  | H59 | 17.137881  | 4.037527  | 4.463879  |
| H59 | 12.891019 | 1.659366  | 7.289850  | H60 | 16.252591  | 4.036195  | 6.006201  |
| H60 | 12.034182 | 3.092493  | 7.889250  | H61 | 17.911869  | 4.673235  | 5.919771  |
| H61 | 13.252707 | 2.282663  | 8.908151  | C62 | 15.103919  | 5.297289  | 3.225921  |
| C62 | 13.890887 | 2.957963  | 4.946170  | C63 | 16.180359  | 5.231025  | 2.349828  |
| C63 | 14.463168 | 1.699645  | 5.051775  | H64 | 17.129858  | 5.701268  | 2.586843  |
| H64 | 14.847932 | 1.321480  | 5.993210  | C65 | 16.039784  | 4.521685  | 1.159342  |
| C65 | 14.538538 | 0.914125  | 3.903954  | H66 | 16.889735  | 4.461231  | 0.483531  |
| H66 | 14.988651 | -0.072869 | 3.978968  | C67 | 14.846594  | 3.880969  | 0.827238  |
| C67 | 14.053713 | 1.354904  | 2.670913  | H68 | 14.767959  | 3.314408  | -0.096659 |
| H68 | 14.127085 | 0.713768  | 1.797588  | C69 | 13.766475  | 3.977620  | 1.685857  |
| C69 | 13.484473 | 2.610432  | 2.575460  | H70 | 12.815583  | 3.503061  | 1.447555  |
| H70 | 13.100844 | 2.988344  | 1.628496  | C71 | 13.874352  | 4.697357  | 2.888246  |
| C71 | 13.398136 | 3.431941  | 3.712693  | C72 | 10.973932  | 9.503116  | 5.076556  |
| C72 | 11.354293 | 9.579005  | 4.985051  | C73 | 10.819631  | 9.158582  | 3.735976  |
| C73 | 11.086161 | 9.230401  | 3.664889  | C74 | 10.100132  | 9.955430  | 2.845500  |
| C74 | 10.471449 | 10.107619 | 2.772599  | C75 | 9.540373   | 11.100626 | 3.382411  |
| C75 | 10.140822 | 11.348025 | 3.286194  | C76 | 9.694843   | 11.447245 | 4.742356  |
| C76 | 10.412287 | 11.701656 | 4.625773  | C77 | 10.418469  | 10.660795 | 5.619745  |
| C77 | 11.025341 | 10.829389 | 5.506020  | H80 | 9.992325   | 9.683963  | 1.798791  |
| H80 | 10.270027 | 9.822305  | 1.743622  | H81 | 8.964818   | 11.758743 | 2.737434  |
| H81 | 9.657595  | 12.076078 | 2.640699  | H82 | 9.233187   | 12.360863 | 5.105684  |
| H82 | 10.129954 | 12.691812 | 4.972363  | H83 | 10.552528  | 10.915608 | 6.667507  |
| H83 | 11.242698 | 11.088873 | 6.538724  | 91  |            |           |           |
| 83  |           |           |           | 2c  | - TS inter |           |           |
| 2c  | - S - cis |           |           | C1  | 14.879546  | 4.125292  | 7.340602  |
| Ru1 | 12.922865 | 5.803758  | 5.342350  | C2  | 14.192590  | 4.865751  | 8.251439  |
| C12 | 10.730685 | 5.239524  | 5.941052  | H3  | 14.422073  | 5.937972  | 8.267815  |
| C13 | 13.690049 | 4.130633  | 6.751370  | C4  | 13.261725  | 4.379606  | 9.306064  |
| O   | 15.128868 | 5.943873  | 4.430714  | H5  | 13.674886  | 4.598674  | 10.299469 |
| N5  | 11.760648 | 8.520711  | 5.623493  | H6  | 12.292947  | 4.891836  | 9.234151  |
| N6  | 11.523690 | 7.988122  | 3.565236  | H7  | 13.077810  | 3.303915  | 9.244468  |
| N7  | 12.099765 | 7.603834  | 4.710087  | C8  | 14.902988  | 2.642972  | 7.208691  |
| C10 | 12.371918 | 8.522978  | 6.927101  | H9  | 14.109866  | 2.139935  | 7.767205  |
| C11 | 11.653661 | 8.090847  | 8.046894  | H10 | 14.828957  | 2.339119  | 6.156772  |
| C12 | 12.331721 | 8.119814  | 9.267618  | H11 | 15.867332  | 2.262644  | 7.571553  |
| H13 | 11.806265 | 7.770880  | 10.156464 | H12 | 15.586394  | 4.669878  | 6.712184  |
| C14 | 13.632745 | 8.596021  | 9.386780  | N13 | 11.442725  | 8.272831  | 5.624319  |

|              |           |           |           |      |           |           |           |
|--------------|-----------|-----------|-----------|------|-----------|-----------|-----------|
| N14          | 11.314114 | 7.275975  | 3.726420  | H3   | 14.587330 | 5.177352  | 7.484787  |
| N15          | 11.877790 | 7.203435  | 4.939603  | C4   | 12.811660 | 4.618020  | 8.658555  |
| C16          | 11.940616 | 8.560371  | 6.946220  | H5   | 12.497323 | 5.646688  | 8.879857  |
| C17          | 11.164205 | 8.224465  | 8.065424  | H6   | 11.913792 | 4.003858  | 8.572389  |
| C18          | 11.745253 | 8.435244  | 9.314307  | H7   | 13.399962 | 4.268923  | 9.519626  |
| H19          | 11.173909 | 8.168404  | 10.203708 | Ru9  | 12.822525 | 5.708677  | 5.623419  |
| C20          | 13.014584 | 8.993757  | 9.455730  | C110 | 10.566792 | 5.191092  | 6.372538  |
| C21          | 13.688465 | 9.429418  | 8.312660  | C111 | 15.143274 | 6.326585  | 5.241118  |
| H22          | 14.647163 | 9.937468  | 8.415205  | O12  | 11.297379 | 2.513258  | 2.792614  |
| C23          | 13.162571 | 9.250210  | 7.039718  | N13  | 12.128268 | 8.573579  | 5.427697  |
| C24          | 9.735701  | 7.782309  | 7.980677  | N14  | 11.794497 | 7.760265  | 3.480476  |
| H25          | 9.538282  | 6.962730  | 8.678527  | N15  | 12.184282 | 7.446602  | 4.715656  |
| H26          | 9.445818  | 7.435379  | 6.986558  | C16  | 12.379207 | 8.546819  | 6.844106  |
| H27          | 9.084291  | 8.621154  | 8.261882  | C17  | 11.275568 | 8.336870  | 7.690499  |
| C28          | 13.641471 | 9.143954  | 10.807082 | C18  | 11.537022 | 8.268744  | 9.052770  |
| H29          | 14.267054 | 10.040761 | 10.863381 | H19  | 10.707514 | 8.091570  | 9.737358  |
| H30          | 14.289593 | 8.285506  | 11.026470 | C20  | 12.827328 | 8.435585  | 9.565446  |
| H31          | 12.889221 | 9.196395  | 11.600162 | C21  | 13.868673 | 8.737603  | 8.689209  |
| C32          | 13.816407 | 9.885761  | 5.851418  | H22  | 14.864635 | 8.934522  | 9.086023  |
| H33          | 14.893185 | 9.989189  | 6.008746  | C23  | 13.669883 | 8.829666  | 7.312073  |
| H34          | 13.398850 | 10.891468 | 5.701911  | C24  | 9.870234  | 8.295294  | 7.174089  |
| H35          | 13.681176 | 9.319568  | 4.925934  | H25  | 9.221707  | 7.749271  | 7.864458  |
| C36          | 11.622853 | 6.400139  | 2.628972  | H26  | 9.785742  | 7.799762  | 6.202021  |
| C37          | 10.798109 | 5.291958  | 2.391286  | H27  | 9.476468  | 9.317066  | 7.079956  |
| C38          | 11.081593 | 4.530561  | 1.261938  | C28  | 13.073299 | 8.292350  | 11.035303 |
| H39          | 10.468781 | 3.652865  | 1.053376  | H29  | 13.989004 | 8.803438  | 11.347150 |
| C40          | 12.120645 | 4.861230  | 0.389906  | H30  | 13.179522 | 7.232801  | 11.303787 |
| C41          | 12.900841 | 5.985803  | 0.663238  | H31  | 12.238207 | 8.688948  | 11.622458 |
| H42          | 13.709662 | 6.254465  | -0.016468 | C32  | 14.767234 | 9.329032  | 6.424248  |
| C43          | 12.673652 | 6.781320  | 1.782696  | H33  | 15.729065 | 8.889475  | 6.704299  |
| C44          | 9.678894  | 4.932054  | 3.315459  | H34  | 14.851928 | 10.418381 | 6.537216  |
| H45          | 9.102812  | 4.092230  | 2.916154  | H35  | 14.607308 | 9.101886  | 5.366756  |
| H46          | 8.987677  | 5.771790  | 3.467058  | C36  | 11.767911 | 6.827191  | 2.388744  |
| H47          | 10.058184 | 4.654024  | 4.309783  | C37  | 10.575822 | 6.139574  | 2.131141  |
| C48          | 12.402769 | 4.003052  | -0.803271 | C38  | 10.560798 | 5.319357  | 1.004115  |
| H49          | 13.085575 | 4.490078  | -1.505772 | H39  | 9.647955  | 4.772182  | 0.768120  |
| H50          | 11.482786 | 3.747157  | -1.340134 | C40  | 11.669590 | 5.195234  | 0.168217  |
| H51          | 12.862378 | 3.057145  | -0.487526 | C41  | 12.828992 | 5.916996  | 0.467001  |
| C52          | 13.540859 | 7.965283  | 2.085386  | H42  | 13.697987 | 5.825563  | -0.185674 |
| H53          | 14.234152 | 8.157824  | 1.262090  | C43  | 12.904885 | 6.756955  | 1.570487  |
| H54          | 14.141133 | 7.801321  | 2.994801  | C44  | 9.375540  | 6.281119  | 3.015260  |
| H55          | 12.952458 | 8.879216  | 2.242504  | H45  | 8.527213  | 5.725054  | 2.606236  |
| Ru56         | 12.933613 | 5.795928  | 5.870852  | H46  | 9.067309  | 7.331046  | 3.114826  |
| C157         | 10.841957 | 5.049747  | 6.767318  | H47  | 9.571280  | 5.902571  | 4.030447  |
| C158         | 15.053312 | 6.939675  | 5.570089  | C48  | 11.636694 | 4.316380  | -1.044825 |
| O59          | 12.139710 | 2.582985  | 5.658882  | H49  | 11.936525 | 4.869385  | -1.942685 |
| C60          | 13.441679 | 4.830413  | 4.347180  | H50  | 10.640069 | 3.899176  | -1.221803 |
| H61          | 13.993772 | 5.464739  | 3.641412  | H51  | 12.343966 | 3.482401  | -0.935057 |
| C62          | 11.251632 | 1.566999  | 6.202085  | C52  | 14.140399 | 7.546356  | 1.877097  |
| H63          | 11.706650 | 0.585059  | 6.008041  | H53  | 14.936228 | 7.308269  | 1.165160  |
| C64          | 11.174642 | 1.755793  | 7.697622  | H54  | 14.519772 | 7.333337  | 2.887811  |
| H65          | 12.153786 | 1.620197  | 8.168152  | H55  | 13.954980 | 8.627663  | 1.815639  |
| H66          | 10.497408 | 1.002566  | 8.115412  | C56  | 12.488755 | 4.468666  | 4.219585  |
| H67          | 10.796666 | 2.751113  | 7.948134  | H57  | 11.442777 | 4.139832  | 4.258089  |
| C68          | 9.898712  | 1.682852  | 5.531433  | C58  | 10.612250 | 1.330095  | 2.327082  |
| H69          | 9.970148  | 1.581985  | 4.441934  | H59  | 11.343710 | 0.508668  | 2.281720  |
| H70          | 9.459388  | 2.660447  | 5.764008  | C60  | 9.572413  | 1.030873  | 3.381692  |
| H71          | 9.225014  | 0.902098  | 5.900900  | H61  | 10.038603 | 0.855861  | 4.356250  |
| C72          | 12.699139 | 2.385039  | 4.469379  | H62  | 8.995724  | 0.141977  | 3.105981  |
| C73          | 12.648376 | 1.170029  | 3.768552  | H63  | 8.880779  | 1.876194  | 3.478385  |
| H74          | 12.077966 | 0.332818  | 4.153348  | C64  | 9.998330  | 1.582318  | 0.966216  |
| C75          | 13.343810 | 1.003230  | 2.582083  | H65  | 10.745285 | 1.866532  | 0.216550  |
| H76          | 13.297258 | 0.038040  | 2.081978  | H66  | 9.259169  | 2.389934  | 1.037986  |
| C77          | 14.101351 | 2.037279  | 2.030180  | H67  | 9.483710  | 0.683260  | 0.610270  |
| H78          | 14.665377 | 1.888447  | 1.113433  | C68  | 12.569562 | 2.759264  | 2.471490  |
| C79          | 14.107540 | 3.254716  | 2.672411  | C69  | 13.268380 | 2.045632  | 1.491996  |
| H80          | 14.659677 | 4.090160  | 2.244405  | H70  | 12.780441 | 1.254163  | 0.931675  |
| C81          | 13.407565 | 3.480988  | 3.887223  | C71  | 14.596358 | 2.346455  | 1.230832  |
| C82          | 10.615060 | 9.046947  | 4.852263  | H72  | 15.121872 | 1.777691  | 0.466216  |
| C83          | 10.529352 | 8.401606  | 3.621856  | C73  | 15.264330 | 3.355573  | 1.928481  |
| C84          | 9.784043  | 8.916673  | 2.562370  | H74  | 16.306136 | 3.575352  | 1.713306  |
| C85          | 9.128500  | 10.107618 | 2.815107  | C75  | 14.591551 | 4.060274  | 2.903251  |
| C86          | 9.215547  | 10.761514 | 4.062673  | H76  | 15.095384 | 4.840666  | 3.469286  |
| C87          | 9.959994  | 10.249981 | 5.109227  | C77  | 13.236964 | 3.796690  | 3.210630  |
| H88          | 9.731298  | 8.406536  | 1.604361  | C82  | 12.713994 | 2.430260  | 6.447057  |
| H89          | 8.529794  | 10.558854 | 2.028764  | H83  | 12.657149 | 1.973484  | 5.453058  |
| H90          | 8.682287  | 11.698004 | 4.200271  | H84  | 13.087575 | 1.663037  | 7.138577  |
| H91          | 10.041763 | 10.744759 | 6.073311  | H85  | 11.702170 | 2.708122  | 6.757078  |
| 91           |           |           |           | H86  | 14.522990 | 3.543087  | 5.810274  |
| 2c - P inter |           |           |           | C87  | 11.485421 | 9.098646  | 3.389601  |
| C1           | 13.649216 | 3.598241  | 6.462382  | C88  | 11.702967 | 9.627075  | 4.659722  |
| C2           | 13.683554 | 4.563181  | 7.448107  | C89  | 11.488493 | 10.972280 | 4.954401  |

|     |           |           |           |     |           |           |           |
|-----|-----------|-----------|-----------|-----|-----------|-----------|-----------|
| C90 | 11.045274 | 11.751152 | 3.901932  | C74 | 10.392488 | 11.594899 | 4.085206  |
| C91 | 10.825585 | 11.216904 | 2.613921  | C75 | 10.931782 | 10.824171 | 5.100740  |
| C92 | 11.039073 | 9.881549  | 2.325512  | H76 | 10.494963 | 9.420794  | 1.419454  |
| H95 | 11.660578 | 11.369441 | 5.951196  | H77 | 9.809983  | 11.751153 | 2.016765  |
| H96 | 10.858584 | 12.808613 | 4.067498  | H78 | 10.083580 | 12.613870 | 4.301062  |
| H97 | 10.477448 | 11.879376 | 1.826233  | H79 | 11.065171 | 11.193225 | 6.114308  |
| H98 | 10.874818 | 9.457209  | 1.338617  | 73  |           |           |           |
| 83  |           |           |           | 3a  | -         | S         |           |
| 2c  | -         | P         | dis       | Ru1 | 12.788463 | 5.530150  | 5.412786  |
| Ru1 | 12.871147 | 5.818668  | 5.431851  | C12 | 10.659412 | 4.637883  | 6.099041  |
| C12 | 11.166773 | 4.851872  | 6.743554  | C13 | 14.906802 | 6.460803  | 5.988545  |
| C13 | 15.120948 | 6.449674  | 5.100038  | O4  | 13.781309 | 3.240616  | 5.888247  |
| O4  | 11.026028 | 2.666533  | 2.798581  | N5  | 11.748174 | 8.447469  | 5.720965  |
| N5  | 11.870429 | 8.510393  | 5.469557  | N6  | 11.293802 | 7.708524  | 3.611636  |
| N6  | 11.625207 | 7.747347  | 3.466805  | B7  | 11.948112 | 7.274927  | 4.853726  |
| N7  | 12.064413 | 7.422980  | 4.700820  | C8  | 12.328206 | 8.760293  | 6.979169  |
| C8  | 12.268005 | 8.513354  | 6.849810  | C9  | 11.698890 | 8.359874  | 8.166433  |
| C9  | 11.315112 | 8.144326  | 7.812900  | C10 | 12.312057 | 8.662048  | 9.381798  |
| C10 | 11.731275 | 8.142477  | 9.137856  | H11 | 11.829576 | 8.343982  | 10.309177 |
| H11 | 11.021256 | 7.847492  | 9.909922  | C12 | 13.513198 | 9.365100  | 9.443457  |
| C12 | 13.025669 | 8.519034  | 9.504685  | C13 | 14.095205 | 9.784942  | 8.251145  |
| C13 | 13.911231 | 8.946392  | 8.515629  | H14 | 15.036189 | 10.338520 | 8.279862  |
| H14 | 14.906787 | 9.287484  | 8.798644  | C15 | 13.522376 | 9.495418  | 7.014269  |
| C15 | 13.554926 | 8.972343  | 7.170215  | C16 | 10.379017 | 7.651746  | 8.130277  |
| C16 | 9.892850  | 7.851467  | 7.447025  | H17 | 9.964019  | 7.551919  | 9.140443  |
| H17 | 9.407047  | 7.259072  | 8.226989  | H18 | 10.458759 | 6.650569  | 7.685312  |
| H18 | 9.803054  | 7.289311  | 6.512186  | H19 | 9.657514  | 8.199637  | 7.510089  |
| H19 | 9.328778  | 8.787986  | 7.337303  | C20 | 14.142764 | 9.687791  | 10.768017 |
| C20 | 13.447445 | 8.470943  | 10.940119 | H21 | 15.183148 | 10.011751 | 10.648497 |
| H21 | 14.278887 | 9.153438  | 11.140830 | H22 | 14.137603 | 8.818663  | 11.437975 |
| H22 | 13.779614 | 7.460604  | 11.209338 | H23 | 13.606009 | 10.493794 | 11.287181 |
| H23 | 12.620098 | 8.727470  | 11.609899 | C24 | 14.198578 | 9.912297  | 5.744963  |
| C24 | 14.477400 | 9.568690  | 6.151487  | H25 | 15.042588 | 10.580817 | 5.951644  |
| H25 | 15.522235 | 9.401282  | 6.428689  | H26 | 13.509106 | 10.417432 | 5.056523  |
| H26 | 14.318561 | 10.654365 | 6.096323  | H27 | 14.581951 | 9.020075  | 5.230351  |
| H27 | 14.339328 | 9.154269  | 5.148110  | C28 | 11.316923 | 7.134452  | 2.317953  |
| C28 | 11.773556 | 6.906327  | 2.314141  | C29 | 10.294648 | 6.265859  | 1.913064  |
| C29 | 10.686106 | 6.114911  | 1.923046  | C30 | 10.368173 | 5.698997  | 0.641792  |
| C30 | 10.849055 | 5.341828  | 0.778286  | H31 | 9.579933  | 5.013506  | 0.322642  |
| H31 | 10.024439 | 4.710675  | 0.448665  | C32 | 11.424085 | 5.974742  | -0.226028 |
| C32 | 12.036772 | 5.351269  | 0.046535  | C33 | 12.418699 | 6.853953  | 0.196207  |
| C33 | 13.073282 | 6.194547  | 0.451587  | H34 | 13.254301 | 7.079566  | -0.470089 |
| H34 | 13.992149 | 6.231575  | -0.133811 | C35 | 12.383663 | 7.439953  | 1.460875  |
| C35 | 12.965551 | 7.001395  | 1.578782  | C36 | 9.173964  | 5.941347  | 2.851011  |
| C36 | 9.404547  | 6.094311  | 2.700762  | H37 | 8.426427  | 5.303228  | 2.365616  |
| H37 | 8.770378  | 5.263705  | 2.374663  | H38 | 8.678468  | 6.853546  | 3.207213  |
| H38 | 8.833692  | 7.021888  | 2.559347  | H39 | 9.549457  | 5.427791  | 3.748148  |
| H39 | 9.569526  | 5.982751  | 3.781541  | C40 | 11.502046 | 5.310822  | -1.570712 |
| C40 | 12.212489 | 4.459371  | -1.142626 | H41 | 12.173672 | 5.852051  | -2.247494 |
| H41 | 12.755284 | 4.962789  | -1.949728 | H42 | 10.516689 | 5.249432  | -2.049568 |
| H42 | 11.252199 | 4.112891  | -1.537968 | H43 | 11.881499 | 4.282858  | -1.488763 |
| H43 | 12.800131 | 3.573571  | -0.864136 | C44 | 13.497647 | 8.321418  | 1.939212  |
| C44 | 14.074211 | 7.921433  | 1.983632  | H45 | 14.220510 | 8.516406  | 1.138658  |
| H45 | 14.825241 | 7.992563  | 1.191960  | H46 | 14.028505 | 7.847792  | 2.778245  |
| H46 | 14.577691 | 7.562700  | 2.892518  | H47 | 13.123219 | 9.281420  | 2.317707  |
| H47 | 13.708836 | 8.936728  | 2.188106  | C48 | 13.069475 | 4.810327  | 3.761178  |
| C48 | 12.351317 | 4.665719  | 4.027666  | H49 | 12.857297 | 5.335804  | 2.820037  |
| H49 | 11.268525 | 4.611256  | 3.885910  | C50 | 13.814803 | 2.485600  | 7.102476  |
| C50 | 10.209098 | 1.574533  | 2.316772  | H51 | 14.740593 | 1.883436  | 7.111359  |
| H51 | 10.805207 | 0.652391  | 2.383012  | C52 | 13.874638 | 3.508772  | 8.214848  |
| C52 | 9.042127  | 1.493127  | 3.271871  | H53 | 14.713002 | 4.196669  | 8.063320  |
| H53 | 9.382365  | 1.310516  | 4.295071  | H54 | 13.980218 | 3.005344  | 9.183695  |
| H54 | 8.368101  | 0.682355  | 2.976746  | H55 | 12.950002 | 4.100951  | 8.222044  |
| H55 | 8.476005  | 2.432367  | 3.258390  | C56 | 12.587541 | 1.599846  | 7.201520  |
| C56 | 9.775611  | 1.837901  | 0.889822  | H57 | 12.547348 | 0.860052  | 6.394300  |
| H57 | 10.625598 | 2.017551  | 0.220789  | H58 | 11.692768 | 2.232111  | 7.132635  |
| H58 | 9.117855  | 2.716135  | 0.857266  | H59 | 12.581969 | 1.067472  | 8.160792  |
| H59 | 9.210862  | 0.983533  | 0.501404  | C60 | 13.958733 | 2.658657  | 4.683182  |
| C60 | 12.338505 | 2.704328  | 2.569489  | C61 | 14.463562 | 1.375969  | 4.491372  |
| C61 | 13.016263 | 1.809156  | 1.737582  | H62 | 14.721487 | 0.751869  | 5.343368  |
| H62 | 12.479826 | 1.030058  | 1.205399  | C63 | 14.644890 | 0.890698  | 3.197336  |
| C63 | 14.392874 | 1.908396  | 1.593246  | H64 | 15.042314 | -0.113671 | 3.058781  |
| H64 | 14.901595 | 1.198703  | 0.943777  | C65 | 14.322887 | 1.674095  | 2.095344  |
| C65 | 15.133644 | 2.888054  | 2.261173  | H66 | 14.463598 | 1.289359  | 1.087089  |
| H66 | 16.210221 | 2.946053  | 2.131322  | C67 | 13.813295 | 2.951718  | 2.294201  |
| C67 | 14.482454 | 3.774273  | 3.088803  | H68 | 13.544800 | 3.582823  | 1.445420  |
| H68 | 15.033030 | 4.552076  | 3.613154  | C69 | 13.617380 | 3.474815  | 3.577919  |
| C69 | 13.078630 | 3.725448  | 3.259394  | C70 | 11.055004 | 9.438838  | 5.019724  |
| C70 | 11.303175 | 9.529731  | 4.745721  | C71 | 10.789095 | 9.006027  | 3.771495  |
| C71 | 11.142831 | 9.038299  | 3.452879  | H72 | 10.794177 | 10.379102 | 5.494205  |
| C72 | 10.605808 | 9.812168  | 2.427110  | H73 | 10.255516 | 9.498748  | 2.965619  |
| C73 | 10.234281 | 11.099619 | 2.775522  | 73  |           |           |           |

|               |           |           |           |
|---------------|-----------|-----------|-----------|
| 3a - S - cis  |           |           |           |
| Ru1           | 12.979466 | 5.541920  | 5.476794  |
| C12           | 10.763530 | 4.697325  | 5.704846  |
| C13           | 13.577856 | 4.671461  | 7.723879  |
| O             | 15.218819 | 6.055778  | 4.899682  |
| N5            | 11.773310 | 8.402378  | 5.660867  |
| N6            | 11.476454 | 7.676569  | 3.516233  |
| B7            | 12.070383 | 7.262650  | 4.786091  |
| C10           | 12.346165 | 8.758605  | 6.911316  |
| C11           | 11.827501 | 8.251707  | 8.111329  |
| C12           | 12.418928 | 8.653991  | 9.309254  |
| H13           | 12.021379 | 8.257750  | 10.245751 |
| C14           | 13.489733 | 9.542024  | 9.346588  |
| C15           | 13.974466 | 10.044675 | 8.140882  |
| H16           | 14.817274 | 10.740136 | 8.147738  |
| C17           | 13.423460 | 9.661043  | 6.920394  |
| C18           | 10.669284 | 7.306469  | 8.117874  |
| H19           | 10.196819 | 7.279864  | 9.106588  |
| H20           | 10.989802 | 6.286307  | 7.863273  |
| H21           | 9.920754  | 7.582289  | 7.366711  |
| C22           | 14.123404 | 9.923966  | 10.652778 |
| H23           | 14.614187 | 10.902964 | 10.592925 |
| H24           | 14.887075 | 9.194390  | 10.953757 |
| H25           | 13.383757 | 9.964330  | 11.461712 |
| C26           | 13.995707 | 10.170786 | 5.630385  |
| H27           | 14.930667 | 10.717200 | 5.804976  |
| H28           | 13.301680 | 10.834650 | 5.098410  |
| H29           | 14.200077 | 9.336874  | 4.942333  |
| C30           | 11.571236 | 7.117639  | 2.215780  |
| C31           | 10.546016 | 6.300488  | 1.721675  |
| C32           | 10.667709 | 5.786896  | 0.428878  |
| H33           | 9.877475  | 5.138946  | 0.043801  |
| C34           | 11.767084 | 6.073841  | -0.375769 |
| C35           | 12.759088 | 6.910517  | 0.130780  |
| H36           | 13.635056 | 7.136842  | -0.481812 |
| C37           | 12.680600 | 7.436926  | 1.416563  |
| C38           | 9.357432  | 5.983112  | 2.573504  |
| H39           | 8.644018  | 5.351386  | 2.031706  |
| H40           | 8.840423  | 6.898521  | 2.889840  |
| H41           | 9.662764  | 5.469419  | 3.497738  |
| C42           | 11.916649 | 5.465594  | -1.739929 |
| H43           | 12.246052 | 6.205977  | -2.480112 |
| H44           | 10.975924 | 5.028698  | -2.093946 |
| H45           | 12.670531 | 4.665230  | -1.735330 |
| C46           | 13.778416 | 8.302721  | 1.954835  |
| H47           | 14.581425 | 8.422959  | 1.218018  |
| H48           | 14.212184 | 7.860140  | 2.861947  |
| H49           | 13.408212 | 9.297107  | 2.240312  |
| C50           | 13.081186 | 4.913599  | 3.760029  |
| H51           | 12.270452 | 4.350823  | 3.268345  |
| C52           | 16.346050 | 6.292317  | 5.783181  |
| H53           | 17.108167 | 6.824950  | 5.193176  |
| C54           | 15.880726 | 7.204701  | 6.889908  |
| H55           | 15.496717 | 8.146213  | 6.485682  |
| H56           | 16.730618 | 7.432874  | 7.546093  |
| H57           | 15.093943 | 6.723816  | 7.484923  |
| C58           | 16.875087 | 4.965192  | 6.283022  |
| H59           | 17.180384 | 4.316225  | 5.453684  |
| H60           | 16.086582 | 4.465892  | 6.861062  |
| H61           | 17.744864 | 5.129150  | 6.931161  |
| C62           | 15.456122 | 5.566755  | 3.642505  |
| C63           | 16.674390 | 5.649216  | 2.975741  |
| H64           | 17.551827 | 6.073731  | 3.454510  |
| C65           | 16.771141 | 5.181693  | 1.665542  |
| H66           | 17.726341 | 5.256513  | 1.148428  |
| C67           | 15.669527 | 4.624937  | 1.025405  |
| H68           | 15.751447 | 4.267146  | 0.000386  |
| C69           | 14.465263 | 4.521288  | 1.709281  |
| H70           | 13.584917 | 4.091455  | 1.230049  |
| C71           | 14.330736 | 4.985553  | 3.021935  |
| C72           | 11.063493 | 9.366129  | 4.934580  |
| C73           | 10.886910 | 8.938483  | 3.669431  |
| H72           | 10.360056 | 9.411021  | 2.847391  |
| H73           | 10.724507 | 10.281714 | 5.407031  |
| 85            |           |           |           |
| 3a - TS inter |           |           |           |
| C80           | 14.307718 | 3.575891  | 7.635724  |
| C81           | 14.384088 | 4.888762  | 7.905282  |
| H82           | 15.183249 | 5.450907  | 7.421709  |
| C83           | 13.544623 | 5.671105  | 8.867740  |
| H84           | 14.090889 | 5.850461  | 9.806067  |
| H85           | 13.304756 | 6.664301  | 8.458120  |
| H86           | 12.599101 | 5.172742  | 9.106306  |
| C87           | 13.335557 | 2.592422  | 8.198300  |
| H88           | 12.478279 | 3.084290  | 8.669697  |
| H89           | 12.939856 | 1.948886  | 7.401023  |
| H90           | 13.815320 | 1.936891  | 8.940881  |
| H91           | 15.036503 | 3.172141  | 6.927600  |
| N1            | 11.175727 | 8.205829  | 5.307133  |
| N2            | 10.730584 | 6.822342  | 3.543287  |
| B3            | 11.578283 | 6.905794  | 4.744182  |
| C4            | 11.753077 | 9.006247  | 6.332465  |
| C5            | 11.301852 | 8.899824  | 7.654610  |
| C6            | 11.884159 | 9.714290  | 8.627900  |
| H7            | 11.537950 | 9.629495  | 9.660376  |
| C8            | 12.876258 | 10.638015 | 8.314428  |
| C9            | 13.268496 | 10.759942 | 6.983518  |
| H10           | 14.029873 | 11.495720 | 6.715314  |
| C11           | 12.722138 | 9.961543  | 5.982203  |
| C12           | 10.185159 | 7.968009  | 8.010632  |
| H13           | 9.926267  | 8.058678  | 9.072199  |
| H14           | 10.439344 | 6.921840  | 7.796528  |
| H15           | 9.288262  | 8.186674  | 7.415591  |
| C16           | 13.516474 | 11.478619 | 9.380892  |
| H17           | 13.791693 | 12.470527 | 9.001078  |
| H18           | 14.437139 | 11.013558 | 9.758027  |
| H19           | 12.849179 | 11.618162 | 10.239972 |
| C20           | 13.167472 | 10.111950 | 4.560241  |
| H21           | 13.832998 | 10.976075 | 4.448700  |
| H22           | 12.316772 | 10.232792 | 3.876856  |
| H23           | 13.713185 | 9.210437  | 4.250129  |
| C24           | 10.776736 | 5.962957  | 2.416735  |
| C25           | 10.013278 | 4.788916  | 2.385706  |
| C26           | 10.088668 | 3.974183  | 1.256765  |
| H27           | 9.494460  | 3.057397  | 1.226636  |
| C28           | 10.894261 | 4.299117  | 0.166463  |
| C29           | 11.626816 | 5.482615  | 0.214490  |
| H30           | 12.263720 | 5.754137  | -0.630369 |
| C31           | 11.582889 | 6.323002  | 1.326197  |
| C32           | 9.146748  | 4.431444  | 3.550989  |
| H33           | 8.592942  | 3.503188  | 3.359963  |
| H34           | 8.424676  | 5.229404  | 3.768459  |
| H35           | 9.747825  | 4.315090  | 4.464701  |
| C36           | 10.989787 | 3.380170  | -1.017120 |
| H37           | 11.329420 | 3.912969  | -1.913233 |
| H38           | 10.022914 | 2.915155  | -1.246303 |
| H39           | 11.702553 | 2.564447  | -0.834655 |
| C40           | 12.431716 | 7.557045  | 1.397301  |
| H41           | 12.991274 | 7.706706  | 0.466740  |
| H42           | 13.150779 | 7.485160  | 2.226989  |
| H43           | 11.831298 | 8.454729  | 1.594939  |
| C44           | 10.191103 | 8.781156  | 4.497558  |
| C45           | 9.930893  | 7.970642  | 3.454732  |
| H46           | 9.218911  | 8.089979  | 2.645062  |
| H47           | 9.745299  | 9.735661  | 4.757865  |
| Ru48          | 12.842177 | 5.585224  | 5.612926  |
| C149          | 10.922322 | 4.676217  | 6.759025  |
| C150          | 14.712562 | 7.115665  | 5.470476  |
| O51           | 12.266042 | 2.373789  | 5.018813  |
| C52           | 13.192632 | 4.721228  | 4.067096  |
| H53           | 12.928392 | 5.070721  | 3.058675  |
| C54           | 11.503410 | 1.169545  | 5.021509  |
| H55           | 12.054286 | 0.385012  | 5.571536  |
| C56           | 10.221539 | 1.459593  | 5.767853  |
| H57           | 10.431759 | 1.845171  | 6.770125  |
| H58           | 9.619040  | 0.545444  | 5.841534  |
| H59           | 9.642369  | 2.227271  | 5.242508  |
| C60           | 11.246162 | 0.725470  | 3.592229  |
| H61           | 12.179521 | 0.501360  | 3.063071  |
| H62           | 10.737319 | 1.537655  | 3.054458  |
| H63           | 10.609326 | -0.167570 | 3.567599  |
| C64           | 13.559226 | 2.324098  | 4.612601  |
| C65           | 14.377488 | 1.196054  | 4.677044  |
| H66           | 13.987503 | 0.245954  | 5.034727  |
| C67           | 15.712899 | 1.289454  | 4.290771  |
| H68           | 16.346268 | 0.405593  | 4.352931  |
| C69           | 16.235386 | 2.493448  | 3.834356  |
| H70           | 17.280978 | 2.563131  | 3.540439  |
| C71           | 15.409404 | 3.610521  | 3.753517  |
| H72           | 15.796819 | 4.569241  | 3.409972  |
| C73           | 14.069285 | 3.542916  | 4.135165  |
| 85            |           |           |           |
| 3a - P inter  |           |           |           |
| C1            | 13.596341 | 3.086333  | 6.786701  |



|      |           |           |           |             |           |           |           |
|------|-----------|-----------|-----------|-------------|-----------|-----------|-----------|
| C2   | 13.646541 | 4.039564  | 7.742807  | H85         | 11.566077 | 2.393722  | 6.994675  |
| H3   | 14.539943 | 4.667587  | 7.757770  | H86         | 14.449157 | 3.035554  | 6.105602  |
| C4   | 12.649446 | 4.290158  | 8.828742  | 73          |           |           |           |
| H5   | 12.430170 | 5.364618  | 8.912047  | 3a - TS dis |           |           |           |
| H6   | 11.699029 | 3.780339  | 8.649271  | N1          | 11.878812 | 8.574359  | 5.699170  |
| H7   | 13.048979 | 3.971207  | 9.802946  | N2          | 11.486850 | 7.633706  | 3.651022  |
| Ru9  | 12.754688 | 5.399523  | 5.646041  | B3          | 12.097813 | 7.329934  | 4.958338  |
| C110 | 10.419860 | 4.851792  | 6.278427  | C4          | 12.377763 | 9.010412  | 6.957747  |
| C111 | 15.088116 | 6.142967  | 5.557521  | C5          | 11.597706 | 8.868973  | 8.112402  |
| O12  | 11.189203 | 2.651435  | 2.561863  | C6          | 12.111291 | 9.330808  | 9.325256  |
| N13  | 11.869290 | 8.399621  | 5.675232  | H7          | 11.507796 | 9.219827  | 10.228879 |
| N14  | 11.576556 | 7.574144  | 3.567444  | C8          | 13.361813 | 9.935784  | 9.409571  |
| B15  | 12.044960 | 7.171043  | 4.894341  | C9          | 14.096056 | 10.104030 | 8.237665  |
| C16  | 12.365763 | 8.728418  | 6.966363  | H10         | 15.069551 | 10.597252 | 8.282214  |
| C17  | 11.577458 | 8.506358  | 8.105807  | C11         | 13.623672 | 9.655226  | 7.007152  |
| C18  | 12.104378 | 8.831281  | 9.356865  | C12         | 10.225404 | 8.273793  | 8.038644  |
| H19  | 11.493608 | 8.658367  | 10.245992 | H13         | 9.736400  | 8.299723  | 9.019570  |
| C20  | 13.374269 | 9.385380  | 9.498593  | H14         | 10.256262 | 7.234430  | 7.685959  |
| C21  | 14.114292 | 9.643295  | 8.347826  | H15         | 9.596130  | 8.821815  | 7.324766  |
| H22  | 15.101945 | 10.101189 | 8.437104  | C16         | 13.914309 | 10.389141 | 10.729948 |
| C23  | 13.632036 | 9.327571  | 7.078639  | H17         | 14.520772 | 11.297254 | 10.622471 |
| C24  | 10.185458 | 7.973096  | 7.975938  | H18         | 14.561309 | 9.622564  | 11.177660 |
| H25  | 9.670988  | 7.986749  | 8.944316  | H19         | 13.114832 | 10.599607 | 11.450672 |
| H26  | 10.179707 | 6.946289  | 7.583700  | C20         | 14.429279 | 9.849954  | 5.760025  |
| H27  | 9.604419  | 8.572141  | 7.263129  | H21         | 15.287674 | 10.505756 | 5.947432  |
| C28  | 13.934072 | 9.691613  | 10.858021 | H22         | 13.826312 | 10.282435 | 4.950891  |
| H29  | 14.682501 | 10.492227 | 10.813156 | H23         | 14.806405 | 8.879556  | 5.409352  |
| H30  | 14.427389 | 8.813533  | 11.296988 | C24         | 11.570471 | 6.971125  | 2.400377  |
| H31  | 13.148143 | 10.001780 | 11.557998 | C25         | 10.643817 | 5.978313  | 2.054110  |
| C32  | 14.453670 | 9.619255  | 5.861276  | C26         | 10.765228 | 5.361885  | 0.809199  |
| H33  | 15.337444 | 10.213874 | 6.121097  | H27         | 10.047549 | 4.585383  | 0.534694  |
| H34  | 13.875886 | 10.162407 | 5.102847  | C28         | 11.776622 | 5.700590  | -0.087534 |
| H35  | 14.791604 | 8.679763  | 5.401877  | C29         | 12.681666 | 6.693506  | 0.280213  |
| C36  | 11.734783 | 6.910158  | 2.324590  | H30         | 13.486847 | 6.966948  | -0.405302 |
| C37  | 10.663989 | 6.203963  | 1.761119  | C31         | 12.597248 | 7.334286  | 1.514743  |
| C38  | 10.867367 | 5.536025  | 0.553382  | C32         | 9.578352  | 5.564541  | 3.019667  |
| H39  | 10.037097 | 4.983309  | 0.108522  | H33         | 8.831862  | 4.926471  | 2.531579  |
| C40  | 12.103476 | 5.538016  | -0.088308 | H34         | 9.073937  | 6.433695  | 3.458781  |
| C41  | 13.143353 | 6.270810  | 0.479289  | H35         | 10.012969 | 5.014851  | 3.867767  |
| H42  | 14.119619 | 6.283735  | -0.010926 | C36         | 11.907374 | 4.986331  | -1.401735 |
| C43  | 12.979407 | 6.965861  | 1.674675  | H37         | 12.461580 | 5.587127  | -2.132622 |
| C44  | 9.347218  | 6.133167  | 2.472561  | H38         | 10.926169 | 4.750713  | -1.832128 |
| H45  | 8.628618  | 5.527353  | 1.906045  | H39         | 12.444989 | 4.034978  | -1.289257 |
| H46  | 8.915381  | 7.130979  | 2.625509  | C40         | 13.624156 | 8.342606  | 1.934499  |
| H47  | 9.461623  | 5.694547  | 3.475515  | H41         | 14.371669 | 8.498439  | 1.148257  |
| C48  | 12.335078 | 4.725224  | -1.328088 | H42         | 14.139651 | 8.005422  | 2.845745  |
| H49  | 12.968784 | 5.254003  | -2.051376 | H43         | 13.171862 | 9.311112  | 2.184833  |
| H50  | 11.392858 | 4.466061  | -1.826792 | C44         | 11.210528 | 9.492338  | 4.883132  |
| H51  | 12.849916 | 3.785420  | -1.077434 | C45         | 10.985179 | 8.943722  | 3.673959  |
| C52  | 14.117122 | 7.727585  | 2.281594  | H46         | 10.483759 | 9.360317  | 2.807052  |
| H53  | 14.957336 | 7.799405  | 1.580857  | H47         | 10.937295 | 10.473338 | 5.257741  |
| H54  | 14.475727 | 7.238888  | 3.200758  | Ru48        | 12.882475 | 5.632229  | 5.683096  |
| H55  | 13.812532 | 8.742566  | 2.569683  | C149        | 10.714205 | 5.034133  | 6.480915  |
| C56  | 12.375698 | 4.582343  | 4.047068  | C150        | 15.010293 | 6.435834  | 6.357407  |
| H57  | 11.321313 | 4.603218  | 3.747923  | O51         | 12.151558 | 2.481413  | 4.950747  |
| C58  | 10.442153 | 1.619167  | 1.940723  | C52         | 13.296035 | 4.870056  | 4.094397  |
| H59  | 11.053380 | 0.700190  | 1.907305  | H53         | 13.227704 | 5.378981  | 3.121574  |
| C60  | 9.245710  | 1.400501  | 2.842187  | C54         | 11.381558 | 1.301744  | 5.141562  |
| H61  | 9.566165  | 1.107814  | 3.846828  | H55         | 11.940172 | 0.598595  | 5.784630  |
| H62  | 8.583137  | 0.627922  | 2.434440  | C56         | 10.121086 | 1.724230  | 5.861401  |
| H63  | 8.684340  | 2.338555  | 2.933566  | H57         | 10.359484 | 2.242985  | 6.794022  |
| C64  | 10.021348 | 2.022794  | 0.538686  | H58         | 9.494674  | 0.847812  | 6.069616  |
| H65  | 10.880088 | 2.286962  | -0.089429 | H59         | 9.555670  | 2.430979  | 5.242272  |
| H66  | 9.367940  | 2.902632  | 0.599252  | C60         | 11.070149 | 0.655178  | 3.802305  |
| H67  | 9.467489  | 1.210802  | 0.051327  | H61         | 11.977979 | 0.367238  | 3.261291  |
| C68  | 12.519442 | 2.789795  | 2.340851  | H62         | 10.515907 | 1.371276  | 3.182468  |
| C69  | 13.235228 | 2.028732  | 1.417373  | H63         | 10.449808 | -0.238918 | 3.939805  |
| H70  | 12.732946 | 1.294213  | 0.792526  | C64         | 13.441791 | 2.387095  | 4.548808  |
| C71  | 14.611286 | 2.209307  | 1.292182  | C65         | 14.189628 | 1.207633  | 4.561406  |
| H72  | 15.159926 | 1.611702  | 0.565125  | H66         | 13.745435 | 0.275794  | 4.901987  |
| C73  | 15.276630 | 3.132180  | 2.088297  | C67         | 15.516088 | 1.216361  | 4.138857  |
| H74  | 16.351887 | 3.267981  | 1.991258  | H68         | 16.086667 | 0.289034  | 4.162655  |
| C75  | 14.562569 | 3.885941  | 3.012268  | C69         | 16.104361 | 2.391427  | 3.690209  |
| H76  | 15.061273 | 4.617551  | 3.648391  | H70         | 17.141520 | 2.399984  | 3.360982  |
| C77  | 13.176954 | 3.752985  | 3.151896  | C71         | 15.353084 | 3.560733  | 3.669322  |
| C78  | 11.349964 | 9.402763  | 4.848076  | H72         | 15.797987 | 4.498963  | 3.337844  |
| C79  | 11.176246 | 8.916604  | 3.602316  | C73         | 14.024367 | 3.588743  | 4.099421  |
| H80  | 11.130520 | 10.390637 | 5.239918  | 73          |           |           |           |
| H81  | 10.779310 | 9.405518  | 2.718932  | 3a - P dis  |           |           |           |
| C82  | 12.528964 | 2.056005  | 6.598561  | Ru9         | 13.150895 | 5.593813  | 5.259339  |
| H83  | 12.381741 | 1.846097  | 5.531401  | C110        | 11.655030 | 4.753927  | 6.897902  |
| H84  | 12.803715 | 1.108641  | 7.086607  | C111        | 15.306409 | 6.490873  | 4.753003  |

|        |           |           |           |              |           |           |           |
|--------|-----------|-----------|-----------|--------------|-----------|-----------|-----------|
| O12    | 11.374704 | 2.615384  | 2.494522  | H11          | 11.867060 | 8.288516  | 10.256797 |
| N13    | 11.790931 | 8.339905  | 5.702648  | C12          | 13.639342 | 9.203918  | 9.455656  |
| N14    | 11.297237 | 7.587191  | 3.601609  | C13          | 14.271371 | 9.624224  | 8.287526  |
| B15    | 12.048007 | 7.205488  | 4.805349  | H14          | 15.245009 | 10.115124 | 8.352814  |
| C16    | 12.342637 | 8.657022  | 6.973915  | C15          | 13.707667 | 9.411261  | 7.032577  |
| C17    | 11.619443 | 8.375328  | 8.142926  | C16          | 10.415290 | 7.769711  | 8.033671  |
| C18    | 12.186489 | 8.700676  | 9.373670  | H17          | 9.970406  | 7.684844  | 9.032453  |
| H19    | 11.631107 | 8.473456  | 10.286248 | H18          | 10.433582 | 6.771582  | 7.575434  |
| C20    | 13.435887 | 9.308846  | 9.468431  | H19          | 9.748688  | 8.376252  | 7.406724  |
| C21    | 14.103827 | 9.634072  | 8.291147  | C20          | 14.300018 | 9.385453  | 10.791734 |
| H22    | 15.065580 | 10.148804 | 8.345527  | H21          | 14.911444 | 10.296120 | 10.819157 |
| C23    | 13.573582 | 9.328675  | 7.037557  | H22          | 14.967230 | 8.544300  | 11.024813 |
| C24    | 10.254250 | 7.765525  | 8.066117  | H23          | 13.563122 | 9.447550  | 11.601846 |
| H25    | 9.800836  | 7.700170  | 9.062143  | C24          | 14.439706 | 9.818538  | 5.791145  |
| H26    | 10.308381 | 6.756589  | 7.636959  | H25          | 15.281112 | 10.479692 | 6.030112  |
| H27    | 9.590639  | 8.355083  | 7.420211  | H26          | 13.787169 | 10.323380 | 5.068143  |
| C28    | 14.044842 | 9.601837  | 10.809210 | H27          | 14.834425 | 8.919219  | 5.297850  |
| H29    | 14.763462 | 10.428447 | 10.754061 | C28          | 11.447105 | 7.189020  | 2.285908  |
| H30    | 14.584545 | 8.729647  | 11.202726 | C29          | 10.385873 | 6.353212  | 1.912872  |
| H31    | 13.280162 | 9.866200  | 11.550376 | C30          | 10.442693 | 5.718414  | 0.671771  |
| C32    | 14.282699 | 9.746522  | 5.785666  | H31          | 9.623724  | 5.057743  | 0.378861  |
| H33    | 15.122975 | 10.410824 | 6.019795  | C32          | 11.520059 | 5.892120  | -0.195230 |
| H34    | 13.602379 | 10.272420 | 5.102653  | C33          | 12.556108 | 6.739183  | 0.194915  |
| H35    | 14.673729 | 8.875770  | 5.241914  | H34          | 13.410547 | 6.883672  | -0.470144 |
| C36    | 11.266946 | 7.048746  | 2.291046  | C35          | 12.539126 | 7.389060  | 1.427796  |
| C37    | 10.181755 | 6.264754  | 1.883557  | C36          | 9.245695  | 6.119151  | 2.854407  |
| C38    | 10.156339 | 5.786586  | 0.571624  | H37          | 8.456451  | 5.526727  | 2.376888  |
| H39    | 9.302852  | 5.189903  | 0.239510  | H38          | 8.811774  | 7.064471  | 3.204600  |
| C40    | 11.186302 | 6.058083  | -0.325494 | H39          | 9.587477  | 5.589371  | 3.756047  |
| C41    | 12.258508 | 6.836210  | 0.110776  | C40          | 11.583252 | 5.152587  | -1.501066 |
| H42    | 13.074355 | 7.058116  | -0.580958 | H41          | 12.167055 | 5.703187  | -2.248646 |
| C43    | 12.316936 | 7.343590  | 1.405907  | H42          | 10.582618 | 4.977051  | -1.914298 |
| C44    | 9.109858  | 5.904533  | 2.866345  | H43          | 12.058296 | 4.168740  | -1.382214 |
| H45    | 8.276898  | 5.387715  | 2.374759  | C44          | 13.700525 | 8.219477  | 1.884933  |
| H46    | 8.718694  | 6.787427  | 3.385366  | H45          | 14.434721 | 8.352131  | 1.081862  |
| H47    | 9.516646  | 5.242640  | 3.645678  | H46          | 14.201438 | 7.735879  | 2.736837  |
| C48    | 11.159450 | 5.523925  | -1.728446 | H47          | 13.386026 | 9.209062  | 2.241986  |
| H49    | 11.341834 | 6.316199  | -2.466091 | C48          | 13.081583 | 4.806036  | 3.745101  |
| H50    | 10.194432 | 5.059786  | -1.964495 | H49          | 12.889578 | 5.322574  | 2.795660  |
| H51    | 11.937243 | 4.763376  | -1.881503 | C50          | 13.766908 | 2.509793  | 7.122211  |
| C52    | 13.476870 | 8.171919  | 1.866222  | H51          | 14.682390 | 1.892255  | 7.130666  |
| H53    | 14.128177 | 8.438279  | 1.025740  | C52          | 13.855719 | 3.548067  | 8.218221  |
| H54    | 14.078034 | 7.630206  | 2.611930  | H53          | 14.705310 | 4.217787  | 8.048581  |
| H55    | 13.137783 | 9.094895  | 2.355247  | H54          | 13.960801 | 3.056843  | 9.193379  |
| C56    | 12.742040 | 4.602926  | 3.787046  | H55          | 12.942627 | 4.157866  | 8.224714  |
| H57    | 11.979187 | 4.891475  | 3.055478  | C56          | 12.526035 | 1.646378  | 7.246658  |
| C58    | 10.662657 | 1.800748  | 1.576830  | H57          | 12.466212 | 0.894511  | 6.451921  |
| H59    | 10.734878 | 0.743669  | 1.886530  | H58          | 11.641570 | 2.292400  | 7.174685  |
| C60    | 9.219468  | 2.242290  | 1.676354  | H59          | 12.519601 | 1.129563  | 8.214341  |
| H61    | 8.853195  | 2.141950  | 2.703093  | C60          | 13.906552 | 2.643163  | 4.701805  |
| H62    | 8.584668  | 1.647406  | 1.009348  | C61          | 14.380890 | 1.346012  | 4.529027  |
| H63    | 9.143588  | 3.298017  | 1.389055  | H62          | 14.618563 | 0.725897  | 5.389746  |
| C64    | 11.216864 | 1.984803  | 0.175352  | C63          | 14.556805 | 0.840038  | 3.242108  |
| H65    | 12.270958 | 1.692231  | 0.116763  | H64          | 14.930008 | -0.175596 | 3.118768  |
| H66    | 11.141428 | 3.046689  | -0.095467 | C65          | 14.258958 | 1.615922  | 2.128203  |
| H67    | 10.649331 | 1.391866  | -0.552516 | H66          | 14.395325 | 1.214424  | 1.125867  |
| C68    | 12.636813 | 2.282410  | 2.875694  | C67          | 13.780724 | 2.908371  | 2.307867  |
| C69    | 13.214630 | 1.035063  | 2.649446  | H68          | 13.533466 | 3.535539  | 1.449808  |
| H70    | 12.677696 | 0.264220  | 2.102247  | C69          | 13.591762 | 3.452871  | 3.583635  |
| C71    | 14.490190 | 0.760595  | 3.138442  | C70          | 11.276034 | 9.570210  | 4.956706  |
| H72    | 14.928347 | -0.219774 | 2.957070  | C71          | 11.016589 | 9.150716  | 3.693987  |
| C73    | 15.195159 | 1.725919  | 3.844145  | C72          | 10.950073 | 10.868675 | 5.603680  |
| H74    | 16.195045 | 1.515662  | 4.217872  | H73          | 10.425118 | 11.530075 | 4.905354  |
| C75    | 14.624186 | 2.975224  | 4.053847  | H74          | 10.306517 | 10.733371 | 6.485789  |
| H76    | 15.182087 | 3.760580  | 4.564382  | H75          | 11.846969 | 11.399255 | 5.955839  |
| C77    | 13.343611 | 3.288679  | 3.578132  | C76          | 10.344828 | 9.866773  | 2.577708  |
| C78    | 10.980303 | 9.274385  | 5.052374  | H77          | 10.053776 | 10.877143 | 2.885648  |
| C79    | 10.687005 | 8.833699  | 3.813723  | H78          | 10.992317 | 9.962647  | 1.693149  |
| H80    | 10.673562 | 10.188210 | 5.550523  | H79          | 9.436751  | 9.345547  | 2.238361  |
| H81    | 10.082065 | 9.293101  | 3.039551  | 79           |           |           |           |
| 3b - s |           |           |           | 3b - s - cis |           |           |           |
| Ru1    | 12.818463 | 5.565111  | 5.382254  | Ru1          | 12.979466 | 5.541920  | 5.476794  |
| C12    | 10.665002 | 4.734739  | 6.071424  | C12          | 10.763530 | 4.697325  | 5.704846  |
| C13    | 14.989973 | 6.388648  | 5.933195  | C13          | 13.577856 | 4.671461  | 7.723879  |
| O4     | 13.732169 | 3.245371  | 5.896643  | O4           | 15.218819 | 6.055778  | 4.899682  |
| N5     | 11.891308 | 8.524409  | 5.672288  | N5           | 11.773310 | 8.402378  | 5.660867  |
| N6     | 11.449657 | 7.814585  | 3.555491  | N6           | 11.476454 | 7.676569  | 3.516233  |
| B7     | 12.050919 | 7.346871  | 4.808188  | B7           | 12.070383 | 7.262650  | 4.786091  |
| C8     | 12.463819 | 8.763617  | 6.950040  | C8           | 12.346165 | 8.758605  | 6.911316  |
| C9     | 11.783545 | 8.375498  | 8.112249  | C9           | 11.827501 | 8.251707  | 8.111329  |
| C10    | 12.392543 | 8.594626  | 9.349287  | C10          | 12.418928 | 8.653991  | 9.309254  |
|        |           |           |           | H11          | 12.021379 | 8.257750  | 10.245751 |

|               |           |           |           |              |           |           |           |
|---------------|-----------|-----------|-----------|--------------|-----------|-----------|-----------|
| C12           | 13.489733 | 9.542024  | 9.346588  | N13          | 11.150512 | 8.348311  | 5.448072  |
| C13           | 13.974466 | 10.044675 | 8.140882  | N14          | 10.649627 | 6.971465  | 3.703982  |
| H14           | 14.817274 | 10.740136 | 8.147738  | B15          | 11.520849 | 7.044473  | 4.883763  |
| C15           | 13.423460 | 9.661043  | 6.920394  | C16          | 11.784562 | 9.103417  | 6.470572  |
| C16           | 10.669284 | 7.306469  | 8.117874  | C17          | 11.413311 | 8.932350  | 7.809766  |
| H17           | 10.196819 | 7.279864  | 9.106588  | C18          | 12.051912 | 9.702787  | 8.783985  |
| H18           | 10.989802 | 6.286307  | 7.863273  | H19          | 11.766105 | 9.571028  | 9.830101  |
| H19           | 9.920754  | 7.582289  | 7.366711  | C20          | 13.026047 | 10.640170 | 8.456210  |
| C20           | 14.123404 | 9.923966  | 10.652778 | C21          | 13.353756 | 10.812435 | 7.112457  |
| H21           | 14.614187 | 10.902964 | 10.592925 | H22          | 14.113190 | 11.547651 | 6.836776  |
| H22           | 14.887075 | 9.194390  | 10.953757 | C23          | 12.754124 | 10.054869 | 6.111136  |
| H23           | 13.383757 | 9.964330  | 11.461712 | C24          | 10.337778 | 7.961999  | 8.192876  |
| C24           | 13.995707 | 10.170786 | 5.630385  | H25          | 10.032295 | 8.111586  | 9.235504  |
| H25           | 14.930667 | 10.717200 | 5.804976  | H26          | 10.662167 | 6.919061  | 8.072674  |
| H26           | 13.301680 | 10.834650 | 5.098410  | H27          | 9.455191  | 8.068973  | 7.549328  |
| H27           | 14.200077 | 9.336874  | 4.942333  | C28          | 13.722175 | 11.437764 | 9.520496  |
| C28           | 11.571236 | 7.117639  | 2.215780  | H29          | 13.939606 | 12.458785 | 9.182177  |
| C29           | 10.546016 | 6.300488  | 1.721675  | H30          | 14.681617 | 10.981382 | 9.798262  |
| C30           | 10.667709 | 5.786896  | 0.428878  | H31          | 13.118335 | 11.505271 | 10.433408 |
| H31           | 9.877475  | 5.138946  | 0.043801  | C32          | 13.169241 | 10.211077 | 4.680244  |
| C32           | 11.767084 | 6.073841  | -0.375769 | H33          | 13.825070 | 11.080625 | 4.553853  |
| C33           | 12.759088 | 6.910517  | 0.130780  | H34          | 12.311307 | 10.315306 | 4.003003  |
| H34           | 13.635056 | 7.136842  | -0.481812 | H35          | 13.720359 | 9.312577  | 4.368202  |
| C35           | 12.680600 | 7.436926  | 1.416563  | C36          | 10.614974 | 6.024817  | 2.650795  |
| C36           | 9.357432  | 5.983112  | 2.573504  | C37          | 9.743592  | 4.929941  | 2.713590  |
| H37           | 8.644018  | 5.351386  | 2.031706  | C38          | 9.765531  | 3.999637  | 1.673344  |
| H38           | 8.840423  | 6.898521  | 2.889840  | H39          | 9.091174  | 3.140097  | 1.718755  |
| H39           | 9.662764  | 5.469419  | 3.497738  | C40          | 10.618851 | 4.138374  | 0.580302  |
| C40           | 11.916649 | 5.465594  | -1.739929 | C41          | 11.450007 | 5.256035  | 0.525240  |
| H41           | 12.246052 | 6.205977  | -2.480112 | H42          | 12.120543 | 5.383899  | -0.327530 |
| H42           | 10.975924 | 5.028698  | -2.093946 | C43          | 11.463585 | 6.203501  | 1.546841  |
| H43           | 12.670531 | 4.665230  | -1.735330 | C44          | 8.824525  | 4.769273  | 3.883315  |
| C44           | 13.778416 | 8.302721  | 1.954835  | H45          | 8.131107  | 3.933047  | 3.728666  |
| H45           | 14.581425 | 8.422959  | 1.218018  | H46          | 8.236342  | 5.679072  | 4.060459  |
| H46           | 14.212184 | 7.860140  | 2.861947  | H47          | 9.397342  | 4.594311  | 4.806091  |
| H47           | 13.408212 | 9.297107  | 2.240312  | C48          | 10.665400 | 3.096127  | -0.499357 |
| C48           | 13.081186 | 4.913599  | 3.760029  | H49          | 10.894497 | 3.537094  | -1.477382 |
| H49           | 12.270452 | 4.350823  | 3.268345  | H50          | 9.713032  | 2.558955  | -0.583980 |
| C50           | 16.346050 | 6.292317  | 5.783181  | H51          | 11.442236 | 2.346688  | -0.295411 |
| H51           | 17.108167 | 6.824950  | 5.193176  | C52          | 12.418186 | 7.359395  | -1.522200 |
| C52           | 15.880726 | 7.204701  | 6.889908  | H53          | 12.948703 | 7.416032  | 0.564683  |
| H53           | 15.496717 | 8.146213  | 6.485682  | H54          | 13.162978 | 7.258903  | 2.325859  |
| H54           | 16.730618 | 7.432874  | 7.546093  | H55          | 11.910520 | 8.316458  | 1.701381  |
| H55           | 15.093943 | 6.723816  | 7.484923  | C56          | 10.163468 | 8.958750  | 4.649103  |
| C56           | 16.875087 | 4.965192  | 6.283022  | C57          | 9.868416  | 8.143617  | 3.608236  |
| H57           | 17.180384 | 4.316225  | 5.453684  | Ru58         | 12.806324 | 5.722243  | 5.720111  |
| H58           | 16.086582 | 4.465892  | 6.861062  | C159         | 10.960738 | 4.658304  | 6.842426  |
| H59           | 17.744864 | 5.129150  | 6.931161  | C160         | 14.683765 | 7.220117  | 5.756542  |
| C60           | 15.456122 | 5.566755  | 3.642505  | O61          | 12.172571 | 2.398479  | 4.564068  |
| C61           | 16.674390 | 5.649216  | 2.975741  | C62          | 13.142707 | 4.797178  | 4.212738  |
| H62           | 17.551827 | 6.073731  | 3.454510  | H63          | 12.656286 | 4.940682  | 3.239165  |
| C63           | 16.771141 | 5.181693  | 1.165542  | C64          | 11.455933 | 1.171007  | 4.575675  |
| H64           | 17.726341 | 5.256513  | 1.148428  | H65          | 11.922786 | 0.487452  | 5.308270  |
| C65           | 15.669527 | 4.624937  | 1.025405  | C66          | 10.059216 | 1.517123  | 5.037774  |
| H66           | 15.751447 | 4.267146  | 0.000386  | H67          | 10.093756 | 2.063581  | 5.986955  |
| C67           | 14.465263 | 4.521288  | 1.709281  | H68          | 9.453484  | 0.609786  | 5.149505  |
| H68           | 13.584917 | 4.091455  | 1.230049  | H69          | 9.583155  | 2.173083  | 4.297657  |
| C69           | 14.330736 | 4.985553  | 3.021935  | C70          | 11.456578 | 0.549661  | 3.189148  |
| C70           | 11.063493 | 9.366129  | 4.934580  | H71          | 12.469110 | 0.314673  | 2.842586  |
| C71           | 10.886910 | 8.938483  | 3.669431  | H72          | 11.011936 | 1.264774  | 2.483567  |
| C72           | 10.511490 | 10.579727 | 5.597090  | H73          | 10.862186 | -0.372299 | 3.175385  |
| H73           | 9.913910  | 11.170953 | 4.894564  | C74          | 13.524370 | 2.386822  | 4.480245  |
| H74           | 9.861427  | 10.308743 | 6.442776  | C75          | 14.344767 | 1.265966  | 4.590957  |
| H75           | 11.290278 | 11.238691 | 6.008751  | H76          | 13.923732 | 0.271946  | 4.722330  |
| C76           | 10.169910 | 9.605932  | 2.549075  | C77          | 15.730255 | 1.430206  | 4.549606  |
| H77           | 9.779512  | 10.579851 | 2.863657  | H78          | 16.369626 | 0.552878  | 4.638081  |
| H78           | 10.825268 | 9.775752  | 1.681791  | C79          | 16.293593 | 2.691979  | 4.408736  |
| H79           | 9.321534  | 9.010459  | 2.179313  | H80          | 17.375275 | 2.810913  | 4.390104  |
| 91            |           |           |           | C81          | 15.465167 | 3.808696  | 4.303353  |
| 3b - TS inter |           |           |           | H82          | 15.876534 | 4.814998  | 4.229967  |
| C1            | 14.319613 | 3.435733  | 7.716317  | C83          | 14.080903 | 3.668440  | 4.320766  |
| C2            | 14.427686 | 4.696415  | 8.155857  | C84          | 9.558120  | 10.265294 | 5.021164  |
| H3            | 15.229097 | 5.305308  | 7.732723  | H85          | 8.765633  | 10.540241 | 4.316214  |
| C4            | 13.572572 | 5.382194  | 9.173879  | H86          | 9.115866  | 10.234481 | 6.027971  |
| H5            | 14.108775 | 5.507966  | 10.126626 | H87          | 10.293467 | 11.083149 | 5.033417  |
| H6            | 13.309828 | 6.393624  | 8.830762  | C88          | 8.873993  | 8.327660  | 2.517967  |
| H7            | 12.636441 | 4.847824  | 9.366677  | H89          | 8.352396  | 9.284556  | 2.629741  |
| C8            | 13.294210 | 2.420268  | 8.098956  | H90          | 9.340088  | 8.318353  | 1.521242  |
| H9            | 12.580248 | 2.279814  | 7.272779  | H91          | 8.113709  | 7.531906  | 2.508199  |
| H10           | 13.761843 | 1.447040  | 8.305217  | 91           |           |           |           |
| H11           | 12.710348 | 2.716727  | 8.976785  | 3b - P inter |           |           |           |
| H12           | 15.036892 | 3.111592  | 6.958735  | C1           | 13.824534 | 3.125066  | 6.042180  |

|      |           |           |           |      |           |           |           |
|------|-----------|-----------|-----------|------|-----------|-----------|-----------|
| C2   | 13.867389 | 3.949959  | 7.111328  | C86  | 10.918659 | 10.773787 | 5.797527  |
| H3   | 14.688333 | 4.670675  | 7.138194  | H87  | 10.412840 | 11.496625 | 5.147519  |
| C4   | 12.966949 | 3.931951  | 8.304442  | H88  | 10.279228 | 10.611520 | 6.678367  |
| H5   | 12.643818 | 4.950303  | 8.562400  | H89  | 11.840128 | 11.246799 | 6.168175  |
| H6   | 12.064375 | 3.337046  | 8.138802  | C89  | 10.212788 | 9.966620  | 2.732474  |
| H7   | 13.498770 | 3.533286  | 9.181196  | H90  | 9.981715  | 10.974712 | 3.094551  |
| Ru9  | 12.719556 | 5.459138  | 5.235467  | H91  | 10.845494 | 10.070666 | 1.838226  |
| C110 | 10.500047 | 4.700108  | 6.042446  | H92  | 9.271096  | 9.509390  | 2.392218  |
| C111 | 15.015019 | 6.286891  | 4.960478  | 79   |           |           |           |
| O12  | 11.021152 | 2.832162  | 2.130937  | 3b   | - TS dis  |           |           |
| N13  | 11.783970 | 8.400485  | 5.709640  | N1   | 11.873786 | 8.606097  | 5.723564  |
| N14  | 11.259421 | 7.824647  | 3.569186  | N2   | 11.474196 | 7.653916  | 3.687305  |
| B15  | 11.877584 | 7.278755  | 4.774215  | B3   | 12.095571 | 7.360413  | 4.983222  |
| C16  | 12.425518 | 8.537457  | 6.970805  | C4   | 12.459738 | 9.040191  | 6.944887  |
| C17  | 11.776359 | 8.119434  | 8.143269  | C5   | 11.788728 | 8.852607  | 8.159878  |
| C18  | 12.449831 | 8.235010  | 9.360569  | C6   | 12.401371 | 9.289312  | 9.335719  |
| H19  | 11.947572 | 7.905160  | 10.272967 | H7   | 11.884561 | 9.137479  | 10.285943 |
| C20  | 13.731655 | 8.772512  | 9.443077  | C8   | 13.643918 | 9.915246  | 9.327859  |
| C21  | 14.330810 | 9.232225  | 8.273159  | C9   | 14.268524 | 10.129823 | 8.101208  |
| H22  | 15.325228 | 9.681602  | 8.321590  | H10  | 15.237836 | 10.632604 | 8.074611  |
| C23  | 13.701028 | 9.126037  | 7.034133  | C11  | 13.698268 | 9.701195  | 6.906087  |
| C24  | 10.377154 | 7.589988  | 8.095435  | C12  | 10.430713 | 8.221855  | 8.198297  |
| H25  | 9.970148  | 7.474624  | 9.107313  | H13  | 10.028348 | 8.227094  | 9.218249  |
| H26  | 10.329855 | 6.619203  | 7.581563  | H14  | 10.457983 | 7.185429  | 7.837119  |
| H27  | 9.720583  | 8.262867  | 7.529205  | H15  | 9.724507  | 8.753181  | 7.546140  |
| C28  | 14.453489 | 8.847674  | 10.757737 | C16  | 14.307978 | 10.333445 | 10.607700 |
| H29  | 15.165097 | 9.682218  | 10.778941 | H17  | 14.889311 | 11.255036 | 10.478268 |
| H30  | 15.026913 | 7.931197  | 10.953723 | H18  | 15.004183 | 9.562888  | 10.965798 |
| H31  | 13.755869 | 8.975550  | 11.594709 | H19  | 13.575293 | 10.504299 | 11.405704 |
| C32  | 14.382031 | 9.619607  | 5.795117  | C20  | 14.408506 | 9.908221  | 5.604086  |
| H33  | 15.252825 | 10.236186 | 6.047878  | H21  | 15.264369 | 10.582250 | 5.727112  |
| H34  | 13.707137 | 10.206369 | 5.159651  | H22  | 13.746104 | 10.315520 | 4.828795  |
| H35  | 14.724781 | 8.765021  | 5.194804  | H23  | 14.783479 | 8.941337  | 5.240595  |
| C36  | 11.280107 | 7.271670  | 2.264012  | C24  | 11.527299 | 6.933123  | 2.467991  |
| C37  | 10.186381 | 6.534044  | 1.790884  | C25  | 10.575895 | 5.945518  | 2.180284  |
| C38  | 10.267635 | 5.962105  | 0.520724  | C26  | 10.671073 | 5.261391  | 0.968280  |
| H39  | 9.420274  | 5.383329  | 0.146814  | H27  | 9.933046  | 4.488784  | 0.740589  |
| C40  | 11.404662 | 6.090178  | -0.273046 | C28  | 11.678295 | 5.532299  | 0.045121  |
| C41  | 12.468898 | 6.847844  | 0.211481  | C29  | 12.610614 | 6.521183  | 0.353694  |
| H42  | 13.372487 | 6.951819  | -0.393811 | H30  | 13.414646 | 6.739695  | -0.352667 |
| C43  | 12.426002 | 7.444504  | 1.468938  | C31  | 12.554971 | 7.223590  | 1.555834  |
| C44  | 8.983598  | 6.315713  | 2.658249  | C32  | 9.506443  | 5.613393  | 3.172546  |
| H45  | 8.238345  | 5.696875  | 2.142417  | H33  | 8.785828  | 4.901575  | 2.751018  |
| H46  | 8.507466  | 7.263282  | 2.944314  | H34  | 8.965659  | 6.510550  | 3.500022  |
| H47  | 9.258360  | 5.817268  | 3.600512  | H35  | 9.942801  | 5.180020  | 4.084389  |
| C48  | 11.514103 | 5.380293  | -1.590597 | C36  | 11.781782 | 4.752469  | -1.233724 |
| H49  | 12.014569 | 5.997705  | -2.347405 | H37  | 12.219781 | 5.354793  | -2.038971 |
| H50  | 10.529167 | 5.095577  | -1.981313 | H38  | 10.799845 | 4.399288  | -1.570928 |
| H51  | 12.108840 | 4.460228  | -1.481734 | H39  | 12.418580 | 3.866088  | -1.111298 |
| C52  | 13.599555 | 8.210383  | 1.998548  | C40  | 13.616692 | 8.217020  | 1.921768  |
| H53  | 14.349573 | 8.370737  | 1.215049  | H41  | 14.346323 | 8.333962  | 1.112275  |
| H54  | 14.078076 | 7.666976  | 2.828711  | H42  | 14.150729 | 7.885958  | 2.824955  |
| H55  | 13.300830 | 9.186745  | 2.403723  | H43  | 13.199410 | 9.203546  | 2.163988  |
| C56  | 12.213320 | 4.768499  | 3.610767  | C44  | 11.198076 | 9.532384  | 4.904820  |
| H57  | 11.131345 | 4.718111  | 3.439156  | C45  | 10.960060 | 8.970622  | 3.695035  |
| C58  | 10.269185 | 1.829006  | 1.468530  | Ru46 | 12.928113 | 5.671972  | 5.702292  |
| H59  | 10.927848 | 0.973339  | 1.237759  | C147 | 10.804084 | 5.020089  | 6.575540  |
| C60  | 9.215900  | 1.398377  | 2.466829  | C148 | 15.040960 | 6.541075  | 6.347627  |
| H61  | 9.681623  | 1.005867  | 3.376124  | O49  | 11.994596 | 2.623963  | 4.787738  |
| H62  | 8.560837  | 0.631183  | 2.037236  | C50  | 13.344229 | 4.897502  | 4.125440  |
| H63  | 8.608720  | 2.265994  | 2.752301  | H51  | 13.255066 | 5.362478  | 3.133676  |
| C64  | 9.647285  | 2.373467  | 0.194897  | C52  | 11.112180 | 1.508049  | 4.785728  |
| H65  | 10.401599 | 2.772108  | -0.493413 | H53  | 11.523392 | 0.712422  | 5.431699  |
| H66  | 8.962266  | 3.191594  | 0.452453  | C54  | 9.805666  | 1.982772  | 5.379441  |
| H67  | 9.078147  | 1.592354  | -0.324404 | H55  | 9.963132  | 2.410599  | 6.373203  |
| C68  | 12.285621 | 3.134552  | 1.745153  | H56  | 9.095695  | 1.148262  | 5.437568  |
| C69  | 12.930607 | 2.530580  | 0.665925  | H57  | 9.374287  | 2.774106  | 4.754090  |
| H70  | 12.416287 | 1.798886  | 0.047712  | C58  | 10.930247 | 0.993787  | 3.367971  |
| C71  | 14.252255 | 2.863129  | 0.375872  | H59  | 11.876219 | 0.660700  | 2.926958  |
| H72  | 14.745160 | 2.386839  | -0.470943 | H60  | 10.531001 | 1.806521  | 2.746852  |
| C73  | 14.935227 | 3.781802  | 1.161450  | H61  | 10.222198 | 0.156261  | 3.345239  |
| H74  | 15.969365 | 4.036080  | 0.937673  | C62  | 13.311439 | 2.429175  | 4.537921  |
| C75  | 14.292189 | 4.379091  | 2.239262  | C63  | 13.965057 | 1.197339  | 4.606957  |
| H76  | 14.809373 | 5.100494  | 2.871438  | H64  | 13.417218 | 0.291126  | 4.852818  |
| C77  | 12.957752 | 4.094695  | 2.548392  | C65  | 15.333951 | 1.123792  | 4.363835  |
| C78  | 11.185986 | 9.505586  | 5.068786  | H66  | 15.832892 | 0.157882  | 4.429288  |
| C79  | 10.876060 | 9.163787  | 3.793086  | C67  | 16.057531 | 2.265853  | 4.045977  |
| C82  | 12.847234 | 2.017138  | 5.807149  | H68  | 17.128951 | 2.207243  | 3.864569  |
| H83  | 12.650783 | 1.900054  | 4.734075  | C69  | 15.399035 | 3.487955  | 3.962515  |
| H84  | 13.237140 | 1.057265  | 6.178360  | H70  | 15.947503 | 4.400377  | 3.730619  |
| H85  | 11.885895 | 2.219381  | 6.290867  | C71  | 14.027550 | 3.592761  | 4.200530  |
| H86  | 14.607587 | 3.257104  | 5.292084  | C72  | 10.811150 | 10.875820 | 5.411218  |

|            |           |           |           |
|------------|-----------|-----------|-----------|
| H73        | 10.278683 | 11.443781 | 4.640324  |
| H74        | 10.157164 | 10.809484 | 6.293453  |
| H75        | 11.684361 | 11.468934 | 5.719673  |
| C76        | 10.216261 | 9.518190  | 2.529853  |
| H77        | 9.872789  | 10.537789 | 2.736340  |
| H78        | 10.829131 | 9.553281  | 1.616810  |
| H79        | 9.332828  | 8.909778  | 2.283455  |
| 79         |           |           |           |
| 3b - P dis |           |           |           |
| Ru9        | 13.051656 | 5.685282  | 4.823172  |
| Cl10       | 11.732292 | 4.547304  | 6.437390  |
| Cl11       | 15.131241 | 6.717111  | 4.255023  |
| O12        | 11.124606 | 2.966380  | 1.927411  |
| N13        | 11.724982 | 8.337270  | 5.733603  |
| N14        | 11.042983 | 7.846007  | 3.612869  |
| B15        | 11.888874 | 7.321885  | 4.688003  |
| C16        | 12.433482 | 8.482336  | 6.957939  |
| C17        | 11.886878 | 7.993361  | 8.154191  |
| C18        | 12.615122 | 8.146931  | 9.333924  |
| H19        | 12.196595 | 7.758798  | 10.265048 |
| C20        | 13.852492 | 8.784740  | 9.355858  |
| C21        | 14.343875 | 9.315325  | 8.165698  |
| H22        | 15.294939 | 9.852364  | 8.170967  |
| C23        | 13.651921 | 9.182860  | 6.962807  |
| C24        | 10.537041 | 7.345333  | 8.171759  |
| H25        | 10.208147 | 7.160913  | 9.201354  |
| H26        | 10.562435 | 6.388073  | 7.634717  |
| H27        | 9.784539  | 7.970128  | 7.673062  |
| C28        | 14.641420 | 8.893791  | 10.628684 |
| H29        | 15.251332 | 9.805484  | 10.648109 |
| H30        | 15.328492 | 8.044761  | 10.747172 |
| H31        | 13.987417 | 8.904126  | 11.509260 |
| C32        | 14.184623 | 9.799425  | 5.705192  |
| H33        | 15.024572 | 10.468556 | 5.926565  |
| H34        | 13.411413 | 10.373139 | 5.176818  |
| H35        | 14.536132 | 9.024376  | 5.010198  |
| C36        | 10.909099 | 7.418474  | 2.268589  |
| C37        | 9.840689  | 6.593398  | 1.897126  |
| C38        | 9.730190  | 6.198097  | 0.562273  |
| H39        | 8.889068  | 5.567120  | 0.263098  |
| C40        | 10.664633 | 6.584030  | -0.394891 |
| C41        | 11.721951 | 7.401791  | 0.003241  |
| H42        | 12.465816 | 7.710902  | -0.734648 |
| C43        | 11.861293 | 7.829669  | 1.320977  |
| C44        | 8.892500  | 6.079946  | 2.937111  |
| H45        | 8.028227  | 5.585132  | 2.477645  |
| H46        | 8.533121  | 6.876726  | 3.598623  |
| H47        | 9.403203  | 5.350350  | 3.583918  |
| C48        | 10.558450 | 6.118862  | -1.818665 |
| H49        | 10.715913 | 6.942330  | -2.526987 |
| H50        | 9.575582  | 5.678980  | -2.026655 |
| H51        | 11.315073 | 5.355229  | -2.047318 |
| C52        | 13.021767 | 8.677346  | 1.744021  |
| H53        | 13.584601 | 9.036993  | 0.874788  |
| H54        | 13.707187 | 8.104444  | 2.387422  |
| H55        | 12.696846 | 9.543430  | 2.336162  |
| C56        | 12.558973 | 4.860772  | 3.276145  |
| H57        | 11.736897 | 5.202422  | 2.639328  |
| C58        | 10.308680 | 2.137360  | 1.115699  |
| H59        | 10.466357 | 1.080901  | 1.393758  |
| C60        | 8.881844  | 2.519849  | 1.440412  |
| H61        | 8.678952  | 2.387335  | 2.507994  |
| H62        | 8.176419  | 1.911108  | 0.862757  |
| H63        | 8.722249  | 3.576545  | 1.192828  |
| C64        | 10.635851 | 2.355771  | -0.350993 |
| H65        | 11.681816 | 2.116168  | -0.571194 |
| H66        | 10.469945 | 3.413298  | -0.597000 |
| H67        | 9.994631  | 1.739157  | -0.992963 |
| C68        | 12.423151 | 2.635018  | 2.159070  |
| C69        | 13.004909 | 1.431444  | 1.765866  |
| H70        | 12.437541 | 0.694458  | 1.203392  |
| C71        | 14.328943 | 1.156031  | 2.103081  |
| H72        | 14.769340 | 0.209882  | 1.791767  |
| C73        | 15.077832 | 2.076975  | 2.821572  |
| H74        | 16.114239 | 1.866176  | 3.076759  |
| C75        | 14.500712 | 3.283426  | 3.200152  |
| H76        | 15.085689 | 4.037072  | 3.728064  |
| C77        | 13.172783 | 3.595605  | 2.881348  |
| C78        | 10.885896 | 9.369769  | 5.269590  |
| C79        | 10.479263 | 9.080565  | 4.009760  |
| C86        | 10.544863 | 10.537892 | 6.124036  |
| H87        | 9.873567  | 11.223129 | 5.594757  |

|        |           |           |           |
|--------|-----------|-----------|-----------|
| H88    | 10.047004 | 10.235839 | 7.057535  |
| H89    | 11.437173 | 11.107709 | 6.422190  |
| C89    | 9.582140  | 9.848602  | 3.106703  |
| H90    | 9.240034  | 10.768050 | 3.594333  |
| H91    | 10.082966 | 10.134995 | 2.169723  |
| H92    | 8.690137  | 9.274051  | 2.814677  |
| 79     |           |           |           |
| 3c - S |           |           |           |
| Ru1    | 12.873457 | 5.591725  | 5.376849  |
| Cl2    | 10.718947 | 4.790103  | 6.088282  |
| Cl3    | 15.060436 | 6.392061  | 5.891507  |
| O      | 13.761413 | 3.288519  | 5.912473  |
| N5     | 11.971456 | 8.534078  | 5.685236  |
| N6     | 11.520676 | 7.829106  | 3.541093  |
| B7     | 12.127091 | 7.358260  | 4.801516  |
| C10    | 12.516963 | 8.760945  | 6.979077  |
| C11    | 11.793785 | 8.396350  | 8.120757  |
| C12    | 12.377598 | 8.603477  | 9.372106  |
| H13    | 11.821161 | 8.315597  | 10.266739 |
| C14    | 13.636757 | 9.180033  | 9.506181  |
| C15    | 14.306294 | 9.587703  | 8.354040  |
| H16    | 15.285359 | 10.063179 | 8.443491  |
| C17    | 13.766879 | 9.391775  | 7.086589  |
| C18    | 10.406587 | 7.843719  | 8.002812  |
| H19    | 9.938750  | 7.755300  | 8.990429  |
| H20    | 10.396776 | 6.855722  | 7.523650  |
| H21    | 9.780839  | 8.496762  | 7.380794  |
| C22    | 14.269858 | 9.352167  | 10.856207 |
| H23    | 14.840117 | 10.287567 | 10.918141 |
| H24    | 14.970458 | 8.535026  | 11.075496 |
| H25    | 13.518727 | 9.359266  | 11.654618 |
| C26    | 14.508284 | 9.826518  | 5.860911  |
| H27    | 15.419346 | 10.373322 | 6.129923  |
| H28    | 13.891849 | 10.471545 | 5.221880  |
| H29    | 14.797870 | 8.946671  | 5.271373  |
| C30    | 11.479864 | 7.207533  | 2.267993  |
| C31    | 10.385060 | 6.411395  | 1.910686  |
| C32    | 10.403524 | 5.779574  | 0.666797  |
| H33    | 9.559516  | 5.147086  | 0.383742  |
| C34    | 11.472527 | 5.924422  | -0.215210 |
| C35    | 12.538189 | 6.742049  | 0.158853  |
| H36    | 13.382267 | 6.869172  | -0.522606 |
| C37    | 12.559869 | 7.390127  | 1.392039  |
| C38    | 9.247063  | 6.226517  | 2.865433  |
| H39    | 8.442991  | 5.638214  | 2.408608  |
| H40    | 8.835503  | 7.193768  | 3.181469  |
| H41    | 9.581165  | 5.714442  | 3.779777  |
| C42    | 11.496574 | 5.190285  | -1.525002 |
| H43    | 12.038566 | 5.754579  | -2.293683 |
| H44    | 10.484023 | 4.995241  | -1.897613 |
| H45    | 11.997173 | 4.217183  | -1.427529 |
| C46    | 13.737260 | 8.213122  | 1.819345  |
| H47    | 14.468456 | 8.307539  | 1.008420  |
| H48    | 14.237729 | 7.752662  | 2.683849  |
| H49    | 13.433576 | 9.220046  | 2.133947  |
| C50    | 13.108689 | 4.818090  | 3.741649  |
| H51    | 12.898888 | 5.320015  | 2.787963  |
| C52    | 13.793890 | 2.569395  | 7.149374  |
| H53    | 14.711776 | 1.956287  | 7.168674  |
| C54    | 13.874976 | 3.622935  | 8.231457  |
| H55    | 14.724725 | 4.291348  | 8.057618  |
| H56    | 13.976263 | 3.145070  | 9.213433  |
| H57    | 12.960225 | 4.230277  | 8.226831  |
| C58    | 12.555605 | 1.703619  | 7.279157  |
| H59    | 12.501185 | 0.942010  | 6.493351  |
| H60    | 11.669263 | 2.345656  | 7.197251  |
| H61    | 12.547323 | 1.198427  | 8.252806  |
| C62    | 13.942551 | 2.672816  | 4.725747  |
| C63    | 14.426395 | 1.377157  | 4.570531  |
| H64    | 14.666894 | 0.769763  | 5.439323  |
| C65    | 14.609319 | 0.857440  | 3.290423  |
| H66    | 14.991133 | -0.156376 | 3.180462  |
| C67    | 14.308538 | 1.616775  | 2.165632  |
| H68    | 14.451282 | 1.203639  | 1.169117  |
| C69    | 13.820031 | 2.907482  | 2.327522  |
| H70    | 13.570496 | 3.522001  | 1.461116  |
| C71    | 13.624763 | 3.465828  | 3.596449  |
| C72    | 11.338155 | 9.563439  | 5.003086  |
| C73    | 11.066372 | 9.135275  | 3.688688  |
| C74    | 10.449648 | 9.982214  | 2.779844  |
| C75    | 10.097916 | 11.269244 | 3.202958  |
| C76    | 10.362120 | 11.691920 | 4.502415  |

|              |           |           |           |               |           |           |           |
|--------------|-----------|-----------|-----------|---------------|-----------|-----------|-----------|
| C77          | 10.988252 | 10.840163 | 5.419187  | H80           | 10.126797 | 9.427627  | 1.697092  |
| H80          | 10.252117 | 9.643109  | 1.763315  | H81           | 9.275828  | 11.660627 | 2.438710  |
| H81          | 9.613222  | 11.946951 | 2.501716  | H82           | 9.649809  | 12.434770 | 4.759815  |
| H82          | 10.082858 | 12.697895 | 4.811490  | H83           | 10.892073 | 10.994681 | 6.388990  |
| H83          | 11.210153 | 11.160496 | 6.436622  | 91            |           |           |           |
| 79           |           |           |           | 3c - TS inter |           |           |           |
| 3c - S - cis |           |           |           | C1            | 14.268146 | 3.574320  | 7.703712  |
| Ru1          | 13.020608 | 5.583535  | 5.451067  | C2            | 14.345096 | 4.889800  | 7.959533  |
| C12          | 10.776337 | 4.833428  | 5.712841  | H3            | 15.152114 | 5.444371  | 7.479986  |
| C13          | 13.586128 | 4.670956  | 7.683744  | C4            | 13.498064 | 5.683829  | 8.904895  |
| O            | 15.292976 | 5.949500  | 4.863200  | H5            | 14.045378 | 5.887364  | 9.837023  |
| N5           | 11.896707 | 8.451603  | 5.633744  | H6            | 13.248892 | 6.668041  | 8.478717  |
| N6           | 11.529380 | 7.719135  | 3.480812  | H7            | 12.558392 | 5.180800  | 9.156517  |
| B7           | 12.147293 | 7.304601  | 4.747359  | C8            | 13.286049 | 2.599768  | 8.266185  |
| C10          | 12.508741 | 8.749452  | 6.883699  | H9            | 12.385550 | 3.097722  | 8.641843  |
| C11          | 11.951456 | 8.288341  | 8.082540  | H10           | 12.963581 | 1.892367  | 7.490313  |
| C12          | 12.609410 | 8.590625  | 9.275920  | H11           | 13.728288 | 2.010380  | 9.083687  |
| H13          | 12.189202 | 8.219183  | 10.212350 | H12           | 15.006164 | 3.161905  | 7.010909  |
| C14          | 13.779876 | 9.341286  | 9.305050  | N13           | 11.142233 | 8.200762  | 5.423851  |
| C15          | 14.290473 | 9.821380  | 8.099380  | N14           | 10.706283 | 6.839438  | 3.612095  |
| H16          | 15.206039 | 10.417952 | 8.102735  | B15           | 11.554460 | 6.913742  | 4.820881  |
| C17          | 13.675796 | 9.532238  | 6.884282  | C16           | 11.728609 | 8.957040  | 6.479513  |
| C18          | 10.686813 | 7.490895  | 8.089806  | C17           | 11.266435 | 8.818030  | 7.794390  |
| H19          | 10.244601 | 7.475009  | 9.092426  | C18           | 11.869133 | 9.581581  | 8.796621  |
| H20          | 10.869689 | 6.453362  | 7.775784  | H19           | 11.516739 | 9.471560  | 9.824558  |
| H21          | 9.954977  | 7.900237  | 7.383477  | C20           | 12.887903 | 10.486878 | 8.516906  |
| C22          | 14.497069 | 9.602597  | 10.597721 | C21           | 13.284798 | 10.647663 | 7.190927  |
| H23          | 14.989918 | 10.582841 | 10.596383 | H22           | 14.062340 | 11.375429 | 6.949377  |
| H24          | 15.275903 | 8.848994  | 10.777679 | C23           | 12.717661 | 9.902806  | 6.160925  |
| H25          | 13.811539 | 9.567532  | 11.452594 | C24           | 10.119268 | 7.910774  | 8.115856  |
| C26          | 14.257652 | 10.022330 | 5.591521  | H25           | 9.837745  | 8.001436  | 9.171605  |
| H27          | 15.220351 | 10.520976 | 5.757820  | H26           | 10.354457 | 6.859862  | 7.903023  |
| H28          | 13.586752 | 10.728778 | 5.084107  | H27           | 9.242647  | 8.158178  | 7.502332  |
| H29          | 14.415775 | 9.187883  | 4.892192  | C28           | 13.547557 | 11.272511 | 9.612778  |
| C30          | 11.556158 | 7.114759  | 2.195922  | H29           | 13.839776 | 12.273221 | 9.270833  |
| C31          | 10.476723 | 6.336361  | 1.757121  | H30           | 14.460641 | 10.775450 | 9.966532  |
| C32          | 10.540364 | 5.771132  | 0.482058  | H31           | 12.885788 | 11.390324 | 10.479226 |
| H33          | 9.709048  | 5.151052  | 0.140467  | C32           | 13.146663 | 10.110829 | 4.741143  |
| C34          | 11.631156 | 5.973815  | -0.359025 | H33           | 13.858248 | 10.941505 | 4.667906  |
| C35          | 12.675344 | 6.779224  | 0.091084  | H34           | 12.290293 | 10.329945 | 4.089497  |
| H36          | 13.543485 | 6.943110  | -0.551863 | H35           | 13.636452 | 9.204354  | 4.362111  |
| C37          | 12.656261 | 7.355093  | 1.358059  | C36           | 10.756140 | 5.973004  | 2.488638  |
| C38          | 9.292918  | 6.113595  | 2.644362  | C37           | 9.981054  | 4.807135  | 2.453966  |
| H39          | 8.535624  | 5.502382  | 2.140209  | C38           | 10.067063 | 3.985174  | 1.330464  |
| H40          | 8.832264  | 7.067081  | 2.934380  | H39           | 9.464678  | 3.073906  | 1.296159  |
| H41          | 9.591911  | 5.614192  | 3.577791  | C40           | 10.891963 | 4.297295  | 0.251032  |
| C42          | 11.714647 | 5.310991  | -1.702930 | C41           | 11.632197 | 5.476144  | 0.302205  |
| H43          | 12.056896 | 6.008251  | -2.478172 | H42           | 12.280131 | 5.739927  | -0.536360 |
| H44          | 10.745833 | 4.905448  | -2.015753 | C43           | 11.577586 | 6.324280  | 1.407111  |
| H45          | 12.430986 | 4.477252  | -1.687373 | C44           | 9.091035  | 4.464545  | 3.605912  |
| C46          | 13.802660 | 8.193483  | 1.833927  | H45           | 8.529396  | 3.542595  | 3.408743  |
| H47          | 14.575215 | 8.276972  | 1.060536  | H46           | 8.374148  | 5.272126  | 3.805500  |
| H48          | 14.264637 | 7.751278  | 2.727326  | H47           | 9.675768  | 4.341603  | 4.529443  |
| H49          | 13.474382 | 9.204007  | 2.113894  | C48           | 10.995640 | 3.371341  | -0.926149 |
| C50          | 13.077913 | 4.935026  | 3.739369  | H49           | 11.353448 | 3.895957  | -1.819845 |
| H51          | 12.232562 | 4.419877  | 3.254445  | H50           | 10.027412 | 2.915054  | -1.166594 |
| C52          | 16.442116 | 6.088276  | 5.742459  | H51           | 11.697296 | 2.549649  | -0.728388 |
| H53          | 17.239051 | 6.565676  | 5.151653  | C52           | 12.421003 | 7.561959  | 1.476572  |
| C54          | 16.057517 | 7.024173  | 6.859757  | H53           | 12.992644 | 7.701765  | 0.552049  |
| H55          | 15.758682 | 8.000685  | 6.466668  | H54           | 13.130570 | 7.505384  | 2.315431  |
| H56          | 16.923381 | 7.168597  | 7.518905  | H55           | 11.810088 | 8.458540  | 1.645899  |
| H57          | 15.231532 | 6.606899  | 7.449559  | Ru56          | 12.816882 | 5.597449  | 5.661438  |
| C58          | 16.870301 | 4.719149  | 6.224783  | C157          | 10.889909 | 4.679271  | 6.785525  |
| H59          | 17.116720 | 4.056631  | 5.386660  | C158          | 14.704661 | 7.106913  | 5.517364  |
| H60          | 16.051569 | 4.276394  | 6.806488  | O59           | 12.284732 | 2.372412  | 5.100933  |
| H61          | 17.756552 | 4.808923  | 6.865021  | C60           | 13.173406 | 4.730034  | 4.117680  |
| C62          | 15.488446 | 5.441322  | 3.606523  | H61           | 12.910378 | 5.077312  | 3.108742  |
| C63          | 16.704442 | 5.447765  | 2.929904  | C62           | 11.510612 | 1.176507  | 5.041742  |
| H64          | 17.609027 | 5.821858  | 3.399795  | H63           | 12.056473 | 0.356466  | 5.542898  |
| C65          | 16.763396 | 4.969455  | 1.621833  | C64           | 10.236948 | 1.439795  | 5.811383  |
| H66          | 17.717222 | 4.985225  | 1.097165  | H65           | 10.458297 | 1.757615  | 6.835078  |
| C67          | 15.626038 | 4.475789  | 0.992135  | H66           | 9.620303  | 0.532411  | 5.832975  |
| H68          | 15.678820 | 4.107862  | -0.031075 | H67           | 9.668092  | 2.248236  | 5.338305  |
| C69          | 14.423471 | 4.446983  | 1.685431  | C68           | 11.242455 | 0.817254  | 3.591015  |
| H70          | 13.516167 | 4.067265  | 1.215298  | H69           | 12.171631 | 0.607051  | 3.048635  |
| C71          | 14.326726 | 4.925768  | 2.996452  | H70           | 10.747608 | 1.667308  | 3.100246  |
| C72          | 11.180140 | 9.425606  | 4.947740  | H71           | 10.590686 | -0.062206 | 3.517589  |
| C73          | 10.960033 | 8.981309  | 3.630022  | C72           | 13.570651 | 2.337978  | 4.672611  |
| C74          | 10.282157 | 9.777178  | 2.717282  | C73           | 14.400144 | 1.217769  | 4.726890  |
| C75          | 9.812526  | 11.025285 | 3.141360  | H74           | 14.022967 | 0.266322  | 5.095099  |
| C76          | 10.023925 | 11.461253 | 4.447173  | C75           | 15.727976 | 1.322880  | 4.319966  |
| C77          | 10.713931 | 10.663396 | 5.366465  | H76           | 16.371268 | 0.445707  | 4.374145  |

C77 16.232093 2.531441 3.853407  
H78 17.272342 2.610419 3.543489  
C79 15.394941 3.640396 3.782505  
H80 15.768284 4.601375 3.429696  
C81 14.061148 3.559945 4.184351  
C82 10.146410 8.785771 4.652489  
C83 9.882084 7.959350 3.545327  
C84 8.937908 8.321991 2.596112  
C85 8.249418 9.527012 2.770274  
C86 8.509054 10.343969 3.866191  
C87 9.464415 9.982450 4.821070  
H88 8.750407 7.678921 1.736877  
H89 7.504669 9.828126 2.035098  
H90 7.966038 11.280713 3.982907  
H91 9.685646 10.620238 5.676214  
91  
3c - P inter  
C1 13.638531 3.146773 6.783309  
C2 13.679940 4.116803 7.723023  
H3 14.566103 4.755432 7.723857  
C4 12.686640 4.371553 8.811187  
H5 12.448567 5.443511 8.875740  
H6 11.744576 3.840440 8.651014  
H7 13.100711 4.078760 9.787443  
Ru9 12.781943 5.435888 5.604150  
C110 10.457541 4.882056 6.255478  
C111 15.123508 6.138993 5.471141  
O12 11.207953 2.577984 2.657854  
N13 11.908120 8.421664 5.650131  
N14 11.623564 7.603173 3.515757  
B15 12.078477 7.194284 4.852990  
C16 12.364798 8.698353 6.969750  
C17 11.521457 8.480761 8.069409  
C18 12.016607 8.739815 9.348660  
H19 11.365709 8.568342 10.208842  
C20 13.305927 9.224943 9.553575  
C21 14.097967 9.490434 8.439449  
H22 15.098642 9.904656 8.579068  
C23 13.648058 9.244312 7.143523  
C24 10.111529 8.020258 7.871933  
H25 9.554388 8.060914 8.815417  
H26 10.074888 6.992760 7.482723  
H27 9.596277 8.650686 7.136021  
C28 13.830991 9.455791 10.941278  
H29 14.603982 10.233748 10.953729  
H30 14.284000 8.544754 11.355664  
H31 13.032733 9.759784 11.629544  
C32 14.507879 9.573006 5.962559  
H33 15.425187 10.082028 6.280266  
H34 13.979432 10.223232 5.253542  
H35 14.792336 8.657454 5.426658  
C36 11.762512 6.908128 2.285618  
C37 10.684384 6.184457 1.760071  
C38 10.877594 5.471474 0.576818  
H39 10.044691 4.899736 0.162133  
C40 12.107135 5.452673 -0.076839  
C41 13.151647 6.209118 0.450671  
H42 14.122103 6.205874 -0.050717  
C43 13.000420 6.945966 1.622686  
C44 9.374662 6.140216 2.486343  
H45 8.646910 5.525411 1.942014  
H46 8.952397 7.145605 2.615177  
H47 9.493920 5.723347 3.498011  
C48 12.326671 4.593497 -1.287181  
H49 12.952101 5.094560 -2.036710  
H50 11.379349 4.315369 -1.765317  
H51 12.844332 3.664000 -1.005763  
C52 14.141215 7.731259 2.192239  
H53 14.981565 7.763866 1.489152  
H54 14.498252 7.284793 3.133360  
H55 13.842318 8.762303 2.424259  
C56 12.397133 4.587869 4.021320  
H57 11.339837 4.595635 3.732272  
C58 10.448510 1.537767 2.063135  
H59 11.062387 0.621246 2.017475  
C60 9.280014 1.316653 2.999695  
H61 9.631705 1.032621 3.996516  
H62 8.613475 0.535190 2.616097  
H63 8.712715 2.249727 3.101585  
C64 9.989416 1.934960 0.671647  
H65 10.831949 2.188985 0.017799  
H66 9.343641 2.819470 0.745909

H67 9.416862 1.123776 0.205109  
C68 12.526074 2.733254 2.385256  
C69 13.226974 1.952462 1.466633  
H70 12.720116 1.187133 0.884147  
C71 14.595155 2.151231 1.293780  
H72 15.132089 1.537112 0.571824  
C73 15.268295 3.111827 2.036904  
H74 16.337647 3.261074 1.902409  
C75 14.569417 3.886061 2.955586  
H76 15.074956 4.646176 3.551178  
C77 13.190852 3.736228 3.140561  
C82 12.584400 2.099443 6.617304  
H83 12.426631 1.878040 5.554114  
H84 12.881033 1.160716 7.109039  
H85 11.621810 2.424218 7.024460  
H86 14.489219 3.095607 6.099405  
C87 11.238276 8.939332 3.537638  
C88 11.407376 9.437892 4.845453  
C89 11.102973 10.757809 5.146178  
C90 10.629542 11.583174 4.120266  
C91 10.472075 11.092663 2.827151  
C92 10.778077 9.761926 2.520339  
H95 11.245892 11.132296 6.159429  
H96 10.388728 12.622491 4.337870  
H97 10.110468 11.751839 2.039279  
H98 10.669172 9.370774 1.509088  
79  
3c - TS dis  
N1 11.912916 8.595023 5.730653  
N2 11.503787 7.595821 3.690249  
B3 12.150479 7.339092 4.994215  
C4 12.460895 9.041616 6.967090  
C5 11.745813 8.871604 8.158658  
C6 12.325870 9.310921 9.349962  
H7 11.777228 9.173604 10.284271  
C8 13.575599 9.922777 9.375171  
C9 14.237446 10.128420 8.166625  
H10 15.208083 10.628727 8.166146  
C11 13.698761 9.702616 6.956127  
C12 10.374884 8.269100 8.149236  
H13 9.936126 8.286179 9.153712  
H14 10.394632 7.230908 7.792843  
H15 9.708968 8.821361 7.472750  
C16 14.206038 10.341562 10.671762  
H17 14.800529 11.256174 10.554121  
H18 14.883195 9.565723 11.054067  
H19 13.452147 10.524665 11.446853  
C20 14.427553 9.931899 5.668499  
H21 15.303789 10.571302 5.825653  
H22 13.782706 10.404499 4.915920  
H23 14.774064 8.972528 5.261638  
C24 11.513747 6.858189 2.477914  
C25 10.548953 5.872794 2.237283  
C26 10.604072 5.171297 1.032619  
H27 9.855261 4.400078 0.838004  
C28 11.581390 5.428991 10.073937  
C29 12.519866 6.425765 0.334430  
H30 13.293658 6.640980 -0.405498  
C31 12.504009 7.146896 1.526063  
C32 9.499396 5.578178 3.261874  
H33 8.782262 4.837379 2.886705  
H34 8.949071 6.487211 3.538384  
H35 9.950510 5.198795 4.190796  
C36 11.641537 4.634724 -1.198504  
H37 12.050681 5.228990 -2.024497  
H38 10.648996 4.277205 -1.497500  
H39 12.283664 3.750812 -1.087910  
C40 13.552965 8.175353 1.825162  
H41 14.258627 8.273160 0.992487  
H42 14.118478 7.901959 2.728009  
H43 13.109977 9.160556 2.021827  
C44 11.193988 9.478132 4.935558  
C45 10.941194 8.869701 3.691778  
C46 10.243195 9.541328 2.698563  
C47 9.795161 10.840500 2.961943  
C48 10.050136 11.444404 4.189656  
C49 10.755751 10.769607 5.191516  
H50 10.059189 9.059839 1.738763  
H51 9.245560 11.383071 2.194604  
H52 9.699839 12.458520 4.376245  
H53 10.969365 11.236688 6.152291  
Ru54 13.005815 5.690356 5.720872

|            |           |           |           |
|------------|-----------|-----------|-----------|
| C155       | 10.916635 | 5.017914  | 6.651217  |
| C156       | 15.122465 | 6.566248  | 6.331981  |
| O57        | 12.007259 | 2.681376  | 4.747658  |
| C58        | 13.404426 | 4.921186  | 4.136930  |
| H59        | 13.298412 | 5.387621  | 3.148109  |
| C60        | 11.086406 | 1.598063  | 4.676028  |
| H61        | 11.462548 | 0.753868  | 5.280118  |
| C62        | 9.790752  | 2.084913  | 5.283397  |
| H63        | 9.951338  | 2.449752  | 6.301572  |
| H64        | 9.051575  | 1.274248  | 5.288585  |
| H65        | 9.393661  | 2.923667  | 4.698504  |
| C66        | 10.904881 | 1.173148  | 3.229306  |
| H67        | 11.843399 | 0.825949  | 2.782970  |
| H68        | 10.550614 | 2.037094  | 2.651093  |
| H69        | 10.162973 | 0.369280  | 3.148327  |
| C70        | 13.318176 | 2.454787  | 4.496941  |
| C71        | 13.938641 | 1.204951  | 4.535667  |
| H72        | 13.365707 | 0.307108  | 4.753801  |
| C73        | 15.306830 | 1.104131  | 4.297787  |
| H74        | 15.780590 | 0.124297  | 4.337548  |
| C75        | 16.062485 | 2.235401  | 4.016556  |
| H76        | 17.133064 | 2.153471  | 3.840026  |
| C77        | 15.437161 | 3.476479  | 3.964408  |
| H78        | 16.009464 | 4.380597  | 3.759824  |
| C79        | 14.067152 | 3.606579  | 4.194460  |
| 79         |           |           |           |
| 3c - P dis |           |           |           |
| Ru9        | 13.121531 | 5.597273  | 5.246206  |
| C110       | 11.550462 | 4.788000  | 6.826449  |
| C111       | 15.317868 | 6.420754  | 4.810664  |
| O12        | 11.328944 | 2.627897  | 2.524175  |
| N13        | 11.889335 | 8.392856  | 5.619245  |
| N14        | 11.441474 | 7.637058  | 3.484764  |
| B15        | 12.113606 | 7.231874  | 4.735310  |
| C16        | 12.395271 | 8.657236  | 6.923048  |
| C17        | 11.607068 | 8.381386  | 8.050057  |
| C18        | 12.133800 | 8.651098  | 9.311981  |
| H19        | 11.528733 | 8.428880  | 10.193485 |
| C20        | 13.401985 | 9.203254  | 9.475614  |
| C21        | 14.133738 | 9.530103  | 8.336952  |
| H22        | 15.111202 | 10.004675 | 8.445853  |
| C23        | 13.647136 | 9.278544  | 7.054291  |
| C24        | 10.215238 | 7.851656  | 7.896689  |
| H25        | 9.715688  | 7.785654  | 8.870173  |
| H26        | 10.228632 | 6.852378  | 7.443643  |
| H27        | 9.617202  | 8.501303  | 7.244023  |
| C28        | 13.962580 | 9.439734  | 10.848211 |
| H29        | 14.707433 | 10.244605 | 10.846497 |
| H30        | 14.458532 | 8.540337  | 11.237879 |
| H31        | 13.175509 | 9.707560  | 11.564082 |
| C32        | 14.419193 | 9.706139  | 5.843559  |
| H33        | 15.311913 | 10.272265 | 6.133897  |
| H34        | 13.805352 | 10.341873 | 5.191094  |
| H35        | 14.741166 | 8.840483  | 5.249502  |
| C36        | 11.409420 | 7.047459  | 2.194391  |
| C37        | 10.299625 | 6.291789  | 1.801322  |
| C38        | 10.277358 | 5.761265  | 0.509484  |
| H39        | 9.405399  | 5.186803  | 0.186749  |
| C40        | 11.330550 | 5.957952  | -0.380201 |
| C41        | 12.425747 | 6.711305  | 0.043225  |
| H42        | 13.259576 | 6.874874  | -0.643034 |
| C43        | 12.483247 | 7.269212  | 1.317413  |
| C44        | 9.193804  | 6.024208  | 2.775618  |
| H45        | 8.352167  | 5.515705  | 2.290577  |
| H46        | 8.825064  | 6.950676  | 3.232171  |
| H47        | 9.553715  | 5.388037  | 3.598121  |
| C48        | 11.297891 | 5.384067  | -1.767624 |
| H49        | 11.431710 | 6.164074  | -2.528733 |
| H50        | 10.346942 | 4.877640  | -1.971536 |
| H51        | 12.102843 | 4.651980  | -1.918663 |
| C52        | 13.663320 | 8.076110  | 1.765117  |
| H53        | 14.358447 | 8.249008  | 0.935688  |
| H54        | 14.209085 | 7.565793  | 2.572966  |
| H55        | 13.349991 | 9.050147  | 2.164376  |
| C56        | 12.739450 | 4.600491  | 3.770800  |
| H57        | 12.008308 | 4.896667  | 3.011598  |
| C58        | 10.584131 | 1.801581  | 1.642852  |
| H59        | 10.624610 | 0.756280  | 1.994912  |
| C60        | 9.157281  | 2.294911  | 1.733176  |
| H61        | 8.796238  | 2.249640  | 2.765490  |
| H62        | 8.497918  | 1.694425  | 1.096095  |
| H63        | 9.113071  | 3.339734  | 1.402543  |

|            |           |           |           |
|------------|-----------|-----------|-----------|
| C64        | 11.135402 | 1.912399  | 0.232795  |
| H65        | 12.177412 | 1.578855  | 0.178417  |
| H66        | 11.097921 | 2.965434  | -0.077072 |
| H67        | 10.541108 | 1.314883  | -0.469201 |
| C68        | 12.577449 | 2.265858  | 2.919161  |
| C69        | 13.121828 | 0.998142  | 2.726252  |
| H70        | 12.567055 | 0.228878  | 2.195145  |
| C71        | 14.387196 | 0.702388  | 3.229269  |
| H72        | 14.799618 | -0.293445 | 3.074028  |
| C73        | 15.115415 | 1.664064  | 3.915997  |
| H74        | 16.107158 | 1.435067  | 4.299970  |
| C75        | 14.577766 | 2.933018  | 4.093889  |
| H76        | 15.152774 | 3.715129  | 4.590287  |
| C77        | 13.309511 | 3.267647  | 3.601705  |
| C87        | 10.906824 | 8.914862  | 3.637393  |
| C88        | 11.181754 | 9.373628  | 4.939431  |
| C89        | 10.771154 | 10.634028 | 5.348775  |
| C90        | 10.075527 | 11.434675 | 4.437086  |
| C91        | 9.804872  | 10.981843 | 3.149861  |
| C92        | 10.221253 | 9.712389  | 2.733421  |
| H95        | 10.999216 | 10.981185 | 6.356010  |
| H96        | 9.746771  | 12.427281 | 4.741394  |
| H97        | 9.266245  | 11.622305 | 2.453131  |
| H98        | 10.023460 | 9.351812  | 1.724667  |
| 74         |           |           |           |
| 3a Na+ - S |           |           |           |
| Ru1        | 13.289562 | 5.758172  | 5.177441  |
| C12        | 11.286578 | 4.914872  | 6.114782  |
| C13        | 15.550796 | 6.753027  | 5.263050  |
| O4         | 14.397101 | 3.596482  | 5.681909  |
| N5         | 12.106595 | 8.581598  | 5.558929  |
| N6         | 12.373138 | 8.185810  | 3.321115  |
| B7         | 12.451394 | 7.483645  | 4.620332  |
| C8         | 11.742691 | 8.464253  | 6.939919  |
| C9         | 10.417775 | 8.124115  | 7.258043  |
| C10        | 10.075667 | 7.959407  | 8.596390  |
| H11        | 9.050639  | 7.680773  | 8.845834  |
| C12        | 11.005297 | 8.121787  | 9.621026  |
| C13        | 12.298574 | 8.503531  | 9.279870  |
| H14        | 13.032258 | 8.671694  | 10.069834 |
| C15        | 12.683797 | 8.686676  | 7.951496  |
| C16        | 9.397713  | 7.898353  | 6.185543  |
| H17        | 8.392626  | 7.828999  | 6.613986  |
| H18        | 9.610700  | 6.952895  | 5.667924  |
| H19        | 9.397127  | 8.698636  | 5.434928  |
| C20        | 10.618142 | 7.880407  | 11.049678 |
| H21        | 11.308813 | 8.370386  | 11.744478 |
| H22        | 10.625014 | 6.807825  | 11.282600 |
| H23        | 9.606695  | 8.246797  | 11.260148 |
| C24        | 14.080453 | 9.144394  | 7.646231  |
| H25        | 14.608594 | 9.420366  | 8.564572  |
| H26        | 14.072493 | 10.045389 | 7.010525  |
| H27        | 14.675648 | 8.358954  | 7.157902  |
| C28        | 12.359322 | 7.626457  | 2.007835  |
| C29        | 11.198555 | 6.969715  | 1.570296  |
| C30        | 11.198731 | 6.392952  | 0.302409  |
| H31        | 10.301769 | 5.874266  | -0.040066 |
| C32        | 12.313292 | 6.450388  | -0.533725 |
| C33        | 13.445959 | 7.120195  | -0.076671 |
| H34        | 14.327147 | 7.178425  | -0.717403 |
| C35        | 13.488839 | 7.708031  | 1.186904  |
| C36        | 10.011541 | 6.836056  | 2.474936  |
| H37        | 9.157729  | 6.406260  | 1.941379  |
| H38        | 9.704748  | 7.802945  | 2.893905  |
| H39        | 10.243375 | 6.180609  | 3.327880  |
| C40        | 12.294814 | 5.783950  | -1.877337 |
| H41        | 13.024874 | 6.230572  | -2.560749 |
| H42        | 11.305817 | 5.850743  | -2.344612 |
| H43        | 12.538025 | 4.716869  | -1.792484 |
| C44        | 14.748623 | 8.365404  | 1.669412  |
| H45        | 15.496009 | 8.422403  | 0.871542  |
| H46        | 15.199113 | 7.785323  | 2.091216  |
| H47        | 14.563800 | 9.397839  | 2.005729  |
| C48        | 13.343948 | 4.926426  | 3.552852  |
| H49        | 12.944188 | 5.356843  | 2.624567  |
| C50        | 14.606742 | 2.942363  | 6.947083  |
| H51        | 15.549164 | 2.373916  | 6.881672  |
| C52        | 14.765388 | 4.053676  | 7.959400  |
| H53        | 15.578454 | 4.728846  | 7.672876  |
| H54        | 14.982639 | 3.630549  | 8.946739  |
| H55        | 13.834939 | 4.633943  | 8.027945  |
| C56        | 13.437422 | 2.032371  | 7.264390  |



|                 |           |           |           |                |           |           |           |
|-----------------|-----------|-----------|-----------|----------------|-----------|-----------|-----------|
| H57             | 13.320217 | 1.236030  | 6.521634  | H62            | 10.802740 | 0.869521  | 5.262572  |
| H58             | 12.515029 | 2.626155  | 7.279059  | H63            | 11.764442 | -0.518083 | 5.820857  |
| H59             | 13.580071 | 1.566350  | 8.246339  | C64            | 13.530700 | 2.521627  | 3.679492  |
| C60             | 14.437230 | 2.907926  | 4.519731  | C65            | 14.206402 | 1.432887  | 3.128824  |
| C61             | 14.971299 | 1.631822  | 4.371073  | H66            | 14.191361 | 0.464753  | 3.621437  |
| H62             | 15.373485 | 1.094543  | 5.225376  | C67            | 14.907142 | 1.585291  | 1.935880  |
| C63             | 14.993488 | 1.041169  | 3.110510  | H68            | 15.435658 | 0.729527  | 1.520753  |
| H64             | 15.414841 | 0.043672  | 3.003431  | C69            | 14.926852 | 2.805691  | 1.272572  |
| C65             | 14.487121 | 1.704837  | 1.997331  | H70            | 15.466404 | 2.915218  | 0.334946  |
| H66             | 14.508318 | 1.230922  | 1.019200  | C71            | 14.227249 | 3.880165  | 1.808166  |
| C67             | 13.951037 | 2.974678  | 2.152112  | H72            | 14.187216 | 4.835449  | 1.281106  |
| H68             | 13.543892 | 3.516794  | 1.297729  | C73            | 13.551334 | 3.770356  | 3.025596  |
| C69             | 13.910754 | 3.600809  | 3.404823  | 74             |           |           |           |
| C70             | 11.775221 | 9.738979  | 4.839004  | 3a Na+ - P dis |           |           |           |
| C71             | 11.931795 | 9.505949  | 3.514980  | Na80           | 14.756246 | 8.680758  | 3.845895  |
| H72             | 11.422213 | 10.633204 | 5.342217  | Ru9            | 13.258396 | 5.752982  | 5.213445  |
| H73             | 11.741343 | 10.162465 | 2.672608  | C110           | 11.577018 | 5.270966  | 6.771250  |
| Na80            | 14.521410 | 9.056460  | 4.639484  | C111           | 15.575119 | 6.330990  | 4.605349  |
| 74              |           |           |           | O12            | 11.426170 | 2.992123  | 2.135648  |
| 3a Na+ - TS dis |           |           |           | N13            | 12.647564 | 8.745008  | 5.459498  |
| Na80            | 15.000631 | 8.687195  | 4.284610  | N14            | 12.225856 | 8.064184  | 3.308739  |
| N1              | 12.662220 | 8.709657  | 5.532544  | B15            | 12.551723 | 7.513239  | 4.642278  |
| N2              | 12.554252 | 8.263159  | 3.289732  | C16            | 12.696156 | 8.877080  | 6.886732  |
| B3              | 12.645000 | 7.568733  | 4.590458  | C17            | 11.495855 | 8.784146  | 7.608905  |
| C4              | 12.469181 | 8.716816  | 6.952971  | C18            | 11.541992 | 8.910845  | 8.993768  |
| C5              | 11.156501 | 8.689506  | 7.449362  | H19            | 10.612702 | 8.829969  | 9.559500  |
| C6              | 10.969498 | 8.708344  | 8.827799  | C20            | 12.736110 | 9.132336  | 9.675276  |
| H7              | 9.951955  | 8.679166  | 9.220398  | C21            | 13.904375 | 9.259408  | 8.930725  |
| C8              | 12.040379 | 8.754357  | 9.717628  | H22            | 14.845366 | 9.462868  | 9.444034  |
| C9              | 13.328609 | 8.810010  | 9.195547  | C23            | 13.905309 | 9.140014  | 7.541290  |
| H10             | 14.179081 | 8.871945  | 9.876161  | C24            | 10.192779 | 8.536590  | 6.914626  |
| C11             | 13.562863 | 8.796792  | 7.820831  | H25            | 9.352885  | 8.684792  | 7.600924  |
| C12             | 9.981370  | 8.611359  | 6.525264  | H26            | 10.155050 | 7.500393  | 6.551460  |
| H13             | 9.045240  | 8.764323  | 7.071834  | H27            | 10.052384 | 9.200320  | 6.051797  |
| H14             | 9.944171  | 7.616833  | 6.059712  | C28            | 12.757450 | 9.221627  | 11.171945 |
| H15             | 10.034657 | 9.356356  | 5.720998  | H29            | 13.627615 | 9.781347  | 11.531814 |
| C16             | 11.804346 | 8.732903  | 11.198338 | H30            | 12.801875 | 8.222667  | 11.623740 |
| H17             | 12.651896 | 9.154818  | 11.749361 | H31            | 11.855052 | 9.708791  | 11.558610 |
| H18             | 11.658708 | 7.706425  | 11.557813 | C32            | 15.188676 | 9.324898  | 6.785568  |
| H19             | 10.905764 | 9.298606  | 11.470161 | H33            | 15.993574 | 9.642645  | 7.455918  |
| C20             | 14.970036 | 8.898119  | 7.307963  | H34            | 15.091057 | 10.113994 | 6.021965  |
| H21             | 15.675969 | 9.044426  | 8.131581  | H35            | 15.519956 | 8.390405  | 6.309508  |
| H22             | 15.088481 | 9.769118  | 6.641363  | C36            | 11.732766 | 7.415300  | 2.134241  |
| H23             | 15.282994 | 7.986685  | 6.777266  | C37            | 10.370526 | 7.079864  | 2.078302  |
| C24             | 12.246583 | 7.737134  | 1.999041  | C38            | 9.875434  | 6.501981  | 0.912565  |
| C25             | 10.915456 | 7.393197  | 1.718379  | H39            | 8.814022  | 6.251211  | 0.859577  |
| C26             | 10.614106 | 6.876556  | 0.461091  | C40            | 10.695855 | 6.235177  | -0.184488 |
| H27             | 9.582354  | 6.600478  | 0.238111  | C41            | 12.047874 | 6.551424  | -0.086880 |
| C28             | 11.592966 | 6.697233  | -0.514881 | H42            | 12.709008 | 6.334954  | -0.927622 |
| C29             | 12.902369 | 7.062235  | -0.211586 | C43            | 12.581542 | 7.145650  | 1.057052  |
| H30             | 13.680737 | 6.935581  | -0.965933 | C44            | 9.486395  | 7.296936  | 3.268187  |
| C31             | 13.248322 | 7.580181  | 1.036316  | H45            | 8.445441  | 7.051502  | 3.035391  |
| C32             | 9.854723  | 7.529428  | 2.768391  | H46            | 9.523850  | 8.334487  | 3.624960  |
| H33             | 8.863578  | 7.319454  | 2.354156  | H47            | 9.804647  | 6.662314  | 4.108169  |
| H34             | 9.838306  | 8.536006  | 3.205903  | C48            | 10.123899 | 5.639253  | -1.437601 |
| H35             | 10.029431 | 6.828487  | 3.597976  | H49            | 9.472593  | 6.354169  | -1.956443 |
| C36             | 11.242566 | 6.105313  | -1.847362 | H50            | 9.514333  | 4.751615  | -1.221139 |
| H37             | 11.957651 | 6.401635  | -2.622206 | H51            | 10.911640 | 5.340225  | -2.138308 |
| H38             | 10.242080 | 6.412718  | -2.171865 | C52            | 14.046503 | 7.458277  | 1.128877  |
| H39             | 11.244258 | 5.008925  | -1.803403 | H53            | 14.555017 | 7.187444  | 0.198392  |
| C40             | 14.676902 | 7.927330  | 1.338338  | H54            | 14.531633 | 6.894318  | 1.940366  |
| H41             | 15.309299 | 7.799606  | 0.453711  | H55            | 14.218347 | 8.536943  | 1.276167  |
| H42             | 15.084340 | 7.269786  | 2.123229  | C56            | 12.747173 | 4.759542  | 3.765204  |
| H43             | 14.779435 | 8.979096  | 1.650505  | H57            | 12.013429 | 5.107978  | 3.028283  |
| C44             | 12.501372 | 9.909989  | 4.823759  | C58            | 10.741000 | 2.240462  | 1.134605  |
| C45             | 12.433539 | 9.647682  | 3.498884  | H59            | 10.691864 | 1.183868  | 1.443431  |
| H46             | 12.278317 | 10.326829 | 2.667430  | C60            | 9.337692  | 2.802777  | 1.098249  |
| H47             | 12.413850 | 10.858221 | 5.343695  | H61            | 8.831117  | 2.643923  | 2.055316  |
| Ru48            | 13.174015 | 5.704984  | 5.065722  | H62            | 8.750160  | 2.326840  | 0.304678  |
| C149            | 11.296109 | 5.302999  | 6.422765  | H63            | 9.381247  | 3.883129  | 0.913717  |
| C150            | 15.572535 | 6.198844  | 4.756392  | C64            | 11.466417 | 2.376718  | -0.190298 |
| O51             | 12.869170 | 2.510990  | 4.856301  | H65            | 12.474101 | 1.949145  | -0.146567 |
| C52             | 12.751690 | 4.910011  | 3.494080  | H66            | 11.561295 | 3.441836  | -0.438105 |
| H53             | 12.053134 | 5.340383  | 2.760620  | H67            | 10.912964 | 1.876232  | -0.993539 |
| C54             | 12.852859 | 1.344437  | 5.681278  | C68            | 12.547018 | 2.506577  | 2.715556  |
| H55             | 13.846931 | 0.868089  | 5.640713  | C69            | 13.033589 | 1.213802  | 2.519271  |
| C56             | 12.586510 | 1.841212  | 7.084556  | H70            | 12.541027 | 0.531720  | 1.832549  |
| H57             | 13.383773 | 2.514573  | 7.416592  | C71            | 14.156143 | 0.779247  | 3.215473  |
| H58             | 12.517508 | 0.998703  | 7.782440  | H72            | 14.518284 | -0.234065 | 3.053738  |
| H59             | 11.648393 | 2.408497  | 7.106632  | C73            | 14.813391 | 1.622383  | 4.104033  |
| C60             | 11.783432 | 0.383636  | 5.197572  | H74            | 15.692994 | 1.280214  | 4.642847  |
| H61             | 11.945052 | 0.079401  | 4.157558  | C75            | 14.346847 | 2.914844  | 4.279123  |

|     |           |           |           |
|-----|-----------|-----------|-----------|
| H76 | 14.881466 | 3.596291  | 4.940519  |
| C77 | 13.217341 | 3.395414  | 3.595050  |
| C78 | 12.311512 | 9.857272  | 4.675635  |
| C79 | 12.061536 | 9.458616  | 3.407452  |
| H80 | 12.252494 | 10.850637 | 5.108449  |
| H81 | 11.742939 | 10.043652 | 2.551446  |
| 80  |           |           |           |
| 3b  | Na+ - S   |           |           |
| Ru1 | 13.127709 | 5.702199  | 5.240178  |
| C12 | 11.456652 | 5.105453  | 6.807190  |
| C13 | 15.351549 | 6.541467  | 4.545804  |
| O4  | 14.295492 | 3.568282  | 5.714743  |
| N5  | 12.173177 | 8.612046  | 5.570542  |
| N6  | 11.788035 | 7.955716  | 3.415487  |
| B7  | 12.205888 | 7.401356  | 4.715562  |
| C8  | 12.172211 | 8.634703  | 7.003383  |
| C9  | 10.959417 | 8.417394  | 7.678302  |
| C10 | 10.964999 | 8.383503  | 9.069116  |
| H11 | 10.025954 | 8.201091  | 9.594102  |
| C12 | 12.135785 | 8.545389  | 9.806232  |
| C13 | 13.316679 | 8.795742  | 9.115067  |
| H14 | 14.239274 | 8.957471  | 9.675060  |
| C15 | 13.354514 | 8.853191  | 7.721374  |
| C16 | 9.690278  | 8.163132  | 6.926055  |
| H17 | 8.822756  | 8.225903  | 7.591076  |
| H18 | 9.718711  | 7.150016  | 6.502022  |
| H19 | 9.540562  | 8.864609  | 6.095394  |
| C20 | 12.120669 | 8.435344  | 11.301884 |
| H21 | 12.972229 | 8.954907  | 11.754784 |
| H22 | 12.172322 | 7.385598  | 11.618601 |
| H23 | 11.201113 | 8.853410  | 11.727348 |
| C24 | 14.652227 | 9.164910  | 7.035232  |
| H25 | 15.413165 | 9.469279  | 7.761203  |
| H26 | 14.539967 | 10.006666 | 6.331943  |
| H27 | 15.055003 | 8.297319  | 6.492193  |
| C28 | 11.404761 | 7.229667  | 2.248362  |
| C29 | 10.145121 | 6.609902  | 2.224250  |
| C30 | 9.783456  | 5.873286  | 1.099024  |
| H31 | 8.807777  | 5.384822  | 1.079959  |
| C32 | 10.637606 | 5.731752  | 0.006540  |
| C33 | 11.879187 | 6.360591  | 0.055002  |
| H34 | 12.562519 | 6.259144  | -0.789685 |
| C35 | 12.279687 | 7.106076  | 1.163012  |
| C36 | 9.238920  | 6.680604  | 3.415121  |
| H37 | 8.252748  | 6.265007  | 3.184259  |
| H38 | 9.105027  | 7.709356  | 3.774062  |
| H39 | 9.660481  | 6.107549  | 4.254555  |
| C40 | 10.238351 | 4.895265  | -1.172919 |
| H41 | 10.783020 | 5.185558  | -2.077761 |
| H42 | 9.165421  | 4.978526  | -1.379853 |
| H43 | 10.448735 | 3.832992  | -0.992919 |
| C44 | 13.652909 | 7.708626  | 1.201457  |
| H45 | 14.162942 | 7.593581  | 0.239592  |
| H46 | 14.275629 | 7.206797  | 1.959180  |
| H47 | 13.618580 | 8.789256  | 1.414279  |
| C48 | 12.699548 | 4.662661  | 3.801441  |
| H49 | 12.049004 | 4.987282  | 2.977786  |
| C50 | 14.855458 | 3.078284  | 6.946487  |
| H51 | 15.735087 | 2.461898  | 6.697479  |
| C52 | 15.306820 | 4.305292  | 7.706050  |
| H53 | 16.009110 | 4.896327  | 7.108866  |
| H54 | 15.794779 | 4.006753  | 8.640957  |
| H55 | 14.439813 | 4.933819  | 7.952319  |
| C56 | 13.819095 | 2.274999  | 7.705852  |
| H57 | 13.490499 | 1.392151  | 7.146970  |
| H58 | 12.942963 | 2.908130  | 7.893562  |
| H59 | 14.231783 | 1.939383  | 8.664494  |
| C60 | 14.002763 | 2.735093  | 4.692146  |
| C61 | 14.463528 | 1.427485  | 4.577045  |
| H62 | 15.084305 | 0.986697  | 5.352063  |
| C63 | 14.128235 | 0.679975  | 3.451364  |
| H64 | 14.495504 | -0.340943 | 3.368202  |
| C65 | 13.336057 | 1.218155  | 2.442016  |
| H66 | 13.079937 | 0.622635  | 1.569272  |
| C67 | 12.873276 | 2.520088  | 2.565494  |
| H68 | 12.248103 | 2.965854  | 1.790964  |
| C69 | 13.189803 | 3.303203  | 3.683414  |
| C70 | 11.672118 | 9.714495  | 4.835155  |
| C71 | 11.438689 | 9.323388  | 3.553384  |
| C72 | 11.456360 | 11.040623 | 5.476068  |
| H73 | 11.182367 | 11.795441 | 4.732043  |
| H74 | 10.655273 | 11.005549 | 6.227095  |

|      |              |           |           |
|------|--------------|-----------|-----------|
| H75  | 12.353283    | 11.394323 | 6.003468  |
| C76  | 10.873770    | 10.096105 | 2.414283  |
| H77  | 10.736305    | 11.147269 | 2.686528  |
| H78  | 11.512394    | 10.058293 | 1.520725  |
| H79  | 9.895242     | 9.701037  | 2.107700  |
| Na80 | 14.236025    | 8.818655  | 4.000957  |
| 80   |              |           |           |
| 3b   | Na+ - TS dis |           |           |
| Na80 | 14.862392    | 8.665764  | 4.220493  |
| N1   | 12.592298    | 8.706131  | 5.507858  |
| N2   | 12.386825    | 8.275494  | 3.273064  |
| B3   | 12.527546    | 7.575892  | 4.559419  |
| C4   | 12.433291    | 8.660242  | 6.931458  |
| C5   | 11.133051    | 8.600087  | 7.458555  |
| C6   | 10.975173    | 8.560191  | 8.840036  |
| H7   | 9.966400     | 8.506980  | 9.252564  |
| C8   | 12.065177    | 8.573753  | 9.707242  |
| C9   | 13.340765    | 8.660253  | 9.159181  |
| H10  | 14.205969    | 8.697283  | 9.823146  |
| C11  | 13.544977    | 8.710159  | 7.780177  |
| C12  | 9.936146     | 8.543488  | 6.560062  |
| H13  | 9.015688     | 8.729252  | 7.123348  |
| H14  | 9.863877     | 7.542497  | 6.112164  |
| H15  | 9.990802     | 9.270411  | 5.739018  |
| C16  | 11.863062    | 8.485568  | 11.190449 |
| H17  | 12.712108    | 8.906121  | 11.740438 |
| H18  | 11.751258    | 7.441765  | 11.509878 |
| H19  | 10.956941    | 9.016185  | 11.504637 |
| C20  | 14.941918    | 8.841453  | 7.246244  |
| H21  | 15.658570    | 8.985872  | 8.061153  |
| H22  | 15.039721    | 9.722678  | 6.589262  |
| H23  | 15.259836    | 7.943119  | 6.696611  |
| C24  | 12.063163    | 7.720417  | 1.999979  |
| C25  | 10.733404    | 7.349097  | 1.746783  |
| C26  | 10.418972    | 6.794192  | 0.508628  |
| H27  | 9.387736     | 6.497473  | 0.310309  |
| C28  | 11.385082    | 6.597751  | -0.476553 |
| C29  | 12.694476    | 6.985193  | -0.201817 |
| H30  | 13.464472    | 6.842160  | -0.962198 |
| C31  | 13.052077    | 7.541201  | 1.026405  |
| C32  | 9.687831     | 7.489962  | 2.811321  |
| H33  | 8.690633     | 7.275569  | 2.413627  |
| H34  | 9.675402     | 8.496754  | 3.249186  |
| H35  | 9.878733     | 6.791815  | 3.639969  |
| C36  | 11.024435    | 5.960158  | -1.785125 |
| H37  | 11.719246    | 6.249061  | -2.581183 |
| H38  | 10.011621    | 6.235524  | -2.100232 |
| H39  | 11.052113    | 4.865747  | -1.709444 |
| C40  | 14.485335    | 7.893487  | 1.299491  |
| H41  | 15.100900    | 7.765218  | 0.402843  |
| H42  | 14.908927    | 7.236480  | 2.076583  |
| H43  | 14.595617    | 8.945639  | 1.609566  |
| C44  | 12.386779    | 9.928720  | 4.818076  |
| C45  | 12.260912    | 9.672619  | 3.488614  |
| Ru46 | 13.066380    | 5.704091  | 5.024494  |
| C147 | 11.192661    | 5.253165  | 6.375688  |
| C148 | 15.463735    | 6.184567  | 4.684811  |
| O49  | 12.885210    | 2.504521  | 4.870750  |
| C50  | 12.658648    | 4.887792  | 3.457675  |
| H51  | 11.957388    | 5.312449  | 2.723478  |
| C52  | 12.906738    | 1.344560  | 5.704232  |
| H53  | 13.911125    | 0.890454  | 5.654985  |
| C54  | 12.647010    | 1.848269  | 7.106638  |
| H55  | 13.433285    | 2.542511  | 7.422190  |
| H56  | 12.605801    | 1.010891  | 7.813110  |
| H57  | 11.696187    | 2.394166  | 7.134638  |
| C58  | 11.852060    | 0.355257  | 5.244880  |
| H59  | 12.003236    | 0.046370  | 4.204575  |
| H60  | 10.861202    | 0.818437  | 5.323012  |
| H61  | 11.864947    | -0.541867 | 5.875241  |
| C62  | 13.500636    | 2.514330  | 3.669453  |
| C63  | 14.189817    | 1.434027  | 3.117934  |
| H64  | 14.227354    | 0.479747  | 3.636037  |
| C65  | 14.836081    | 1.575480  | 1.893546  |
| H66  | 15.375717    | 0.725914  | 1.479374  |
| C67  | 14.786352    | 2.777212  | 1.198210  |
| H68  | 15.281685    | 2.878653  | 0.235370  |
| C69  | 14.074307    | 3.842235  | 1.736049  |
| H70  | 13.982573    | 4.781582  | 1.186933  |
| C71  | 13.454072    | 3.746986  | 2.984865  |
| C72  | 12.297608    | 11.224496 | 5.545296  |
| H73  | 12.255071    | 12.063459 | 4.843327  |

|      |           |           |           |
|------|-----------|-----------|-----------|
| H74  | 11.402220 | 11.273841 | 6.180082  |
| H75  | 13.154717 | 11.384612 | 6.213931  |
| C76  | 11.981943 | 10.608218 | 2.365756  |
| H77  | 11.994057 | 11.646079 | 2.713148  |
| H78  | 12.710456 | 10.516449 | 1.548292  |
| H79  | 10.995928 | 10.418321 | 1.919392  |
| 80   |           |           |           |
| 3b   | Na+       | -         | P dis     |
| Na80 | 14.622547 | 8.910337  | 3.913095  |
| Ru9  | 13.378945 | 5.797104  | 5.039779  |
| Cl10 | 11.728744 | 5.099705  | 6.553386  |
| Cl11 | 15.641052 | 6.590421  | 4.465429  |
| O12  | 11.880498 | 2.904054  | 1.883213  |
| N13  | 12.517666 | 8.701933  | 5.466840  |
| N14  | 12.168722 | 8.136977  | 3.276414  |
| B15  | 12.527628 | 7.530492  | 4.568078  |
| C16  | 12.523222 | 8.694527  | 6.900001  |
| C17  | 11.316132 | 8.451797  | 7.575168  |
| C18  | 11.322792 | 8.425622  | 8.966014  |
| H19  | 10.387723 | 8.227115  | 9.492217  |
| C20  | 12.487389 | 8.630813  | 9.701871  |
| C21  | 13.662389 | 8.904219  | 9.009230  |
| H22  | 14.579606 | 9.095061  | 9.568601  |
| C23  | 13.700073 | 8.945869  | 7.615486  |
| C24  | 10.047362 | 8.188978  | 6.824686  |
| H25  | 9.179291  | 8.265827  | 7.487626  |
| H26  | 10.069722 | 7.170472  | 6.412935  |
| H27  | 9.903460  | 8.882611  | 5.986190  |
| C28  | 12.470516 | 8.544729  | 11.198791 |
| H29  | 13.302374 | 9.099587  | 11.646194 |
| H30  | 12.555788 | 7.502611  | 11.531748 |
| H31  | 11.535555 | 8.938548  | 11.613710 |
| C32  | 14.990570 | 9.278438  | 6.924504  |
| H33  | 15.751982 | 9.585391  | 7.648775  |
| H34  | 14.867500 | 10.124131 | 6.227025  |
| H35  | 15.398144 | 8.415564  | 6.377840  |
| C36  | 11.752975 | 7.479916  | 2.079529  |
| C37  | 10.443350 | 6.987215  | 2.005112  |
| C38  | 10.018143 | 6.393609  | 0.817001  |
| H39  | 8.993451  | 6.023691  | 0.751620  |
| C40  | 10.861719 | 6.261260  | -0.282456 |
| C41  | 12.171785 | 6.726719  | -0.167248 |
| H42  | 12.853085 | 6.616211  | -1.013270 |
| C43  | 12.631650 | 7.338397  | 0.996560  |
| C44  | 9.534774  | 7.056142  | 3.194170  |
| H45  | 8.521059  | 6.734509  | 2.935089  |
| H46  | 9.478344  | 8.068288  | 3.615968  |
| H47  | 9.902911  | 6.401509  | 3.997874  |
| C48  | 10.382507 | 5.644327  | -1.564092 |
| H49  | 10.516651 | 6.328857  | -2.410735 |
| H50  | 9.320487  | 5.380994  | -1.511449 |
| H51  | 10.937477 | 4.727084  | -1.804567 |
| C52  | 14.054010 | 7.806717  | 1.090515  |
| H53  | 14.584581 | 7.651077  | 0.145806  |
| H54  | 14.601198 | 7.249337  | 1.866848  |
| H55  | 14.111912 | 8.886115  | 1.309121  |
| C56  | 12.981232 | 4.789805  | 3.565657  |
| H57  | 12.253750 | 5.086970  | 2.800238  |
| C58  | 11.389295 | 2.152988  | 0.773808  |
| H59  | 11.378289 | 1.081396  | 1.031068  |
| C60  | 9.965827  | 2.619234  | 0.569125  |
| H61  | 9.355143  | 2.395085  | 1.449293  |
| H62  | 9.520617  | 2.129427  | -0.304423 |
| H63  | 9.954429  | 3.704592  | 0.414068  |
| C64  | 12.268759 | 2.401097  | -0.436907 |
| H65  | 13.288820 | 2.032904  | -0.282253 |
| H66  | 12.325659 | 3.482555  | -0.619062 |
| H67  | 11.856963 | 1.913067  | -1.328119 |
| C68  | 13.001420 | 2.513470  | 2.533336  |
| C69  | 13.587843 | 1.255707  | 2.387560  |
| H70  | 13.178931 | 0.530116  | 1.690433  |
| C71  | 14.698659 | 0.911576  | 3.148770  |
| H72  | 15.138656 | -0.075905 | 3.025359  |
| C73  | 15.244725 | 1.812464  | 4.055845  |
| H74  | 16.115781 | 1.542525  | 4.646882  |
| C75  | 14.677708 | 3.069454  | 4.183765  |
| H76  | 15.127437 | 3.794517  | 4.862387  |
| C77  | 13.555564 | 3.460291  | 3.431651  |
| C78  | 12.074765 | 9.847596  | 4.760462  |
| C79  | 11.864872 | 9.514021  | 3.458551  |
| C86  | 11.871121 | 11.150843 | 5.449651  |
| H87  | 11.638134 | 11.942106 | 4.730151  |

|     |           |           |           |
|-----|-----------|-----------|-----------|
| H88 | 11.044484 | 11.101216 | 6.171420  |
| H89 | 12.756629 | 11.461138 | 6.021151  |
| C89 | 11.358212 | 10.349812 | 2.336415  |
| H90 | 11.270732 | 11.397276 | 2.641648  |
| H91 | 12.011300 | 10.307713 | 1.453612  |
| H92 | 10.366566 | 10.017179 | 1.999767  |
| 80  |           |           |           |
| 3c  | Na+       | -         | S         |
| Ru1 | 13.145685 | 5.698697  | 5.230509  |
| Cl2 | 11.182198 | 4.780744  | 6.177554  |
| Cl3 | 15.386708 | 6.734547  | 5.308601  |
| O   | 14.309062 | 3.551409  | 5.713769  |
| N5  | 11.929234 | 8.484829  | 5.653799  |
| N6  | 12.179260 | 8.108363  | 3.388948  |
| B7  | 12.278117 | 7.403567  | 4.689769  |
| C10 | 11.590226 | 8.332662  | 7.037465  |
| C11 | 10.282622 | 7.941724  | 7.368833  |
| C12 | 9.966209  | 7.753452  | 8.710245  |
| H13 | 8.955333  | 7.437535  | 8.971892  |
| C14 | 10.903053 | 7.945373  | 9.723727  |
| C15 | 12.177323 | 8.376112  | 9.369001  |
| H16 | 12.914326 | 8.567809  | 10.150573 |
| C17 | 12.536753 | 8.583052  | 8.037052  |
| C18 | 9.254579  | 7.711320  | 6.304896  |
| H19 | 8.269950  | 7.532609  | 6.748960  |
| H20 | 9.520270  | 6.825639  | 5.712150  |
| H21 | 9.171094  | 8.566556  | 5.621550  |
| C22 | 10.544337 | 7.687744  | 11.156780 |
| H23 | 11.196284 | 8.240068  | 11.842387 |
| H24 | 10.641414 | 6.622227  | 11.400486 |
| H25 | 9.507462  | 7.972168  | 11.369272 |
| C26 | 13.908658 | 9.099803  | 7.713414  |
| H27 | 14.438081 | 9.396631  | 8.624564  |
| H28 | 13.850805 | 10.001420 | 7.080908  |
| H29 | 14.528871 | 8.339539  | 7.216375  |
| C30 | 12.187347 | 7.548718  | 2.076433  |
| C31 | 11.035140 | 6.888037  | 1.623319  |
| C32 | 11.056647 | 6.308742  | 0.357436  |
| H33 | 10.167829 | 5.784703  | 0.002386  |
| C34 | 12.183563 | 6.371598  | -0.461566 |
| C35 | 13.305249 | 7.050907  | 0.007892  |
| H36 | 14.193815 | 7.115322  | -0.622004 |
| C37 | 13.326131 | 7.642827  | 1.270134  |
| C38 | 9.835123  | 6.757912  | 2.510447  |
| H39 | 8.992405  | 6.316677  | 1.968843  |
| H40 | 9.515442  | 7.729243  | 2.909567  |
| H41 | 10.056926 | 6.113182  | 3.373894  |
| C42 | 12.189464 | 5.698776  | -1.802512 |
| H43 | 12.939409 | 6.135216  | -2.470766 |
| H44 | 11.212207 | 5.773288  | -2.292857 |
| H45 | 12.419739 | 4.629310  | -1.708033 |
| C46 | 14.567642 | 8.325078  | 1.765116  |
| H47 | 15.319828 | 8.402129  | 0.973359  |
| H48 | 15.024691 | 7.753151  | 2.588793  |
| H49 | 14.352016 | 9.352639  | 2.099427  |
| C50 | 13.196145 | 4.867272  | 3.604532  |
| H51 | 12.775805 | 5.291978  | 2.683346  |
| C52 | 14.564712 | 2.904775  | 6.974769  |
| H53 | 15.511772 | 2.347898  | 6.882598  |
| C54 | 14.740182 | 4.022006  | 7.977813  |
| H55 | 15.537667 | 4.704589  | 7.666454  |
| H56 | 14.989012 | 3.605374  | 8.960429  |
| H57 | 13.806213 | 4.593237  | 8.070283  |
| C58 | 13.417097 | 1.981783  | 7.330852  |
| H59 | 13.285624 | 1.182144  | 6.594076  |
| H60 | 12.488373 | 2.564056  | 7.373094  |
| H61 | 13.596495 | 1.520246  | 8.308879  |
| C62 | 14.328210 | 2.860861  | 4.552803  |
| C63 | 14.866195 | 1.587336  | 4.394369  |
| H64 | 15.289475 | 1.053480  | 5.240506  |
| C65 | 14.864374 | 0.994725  | 3.134560  |
| H66 | 15.288270 | -0.000877 | 3.020454  |
| C67 | 14.331030 | 1.653492  | 2.031006  |
| H68 | 14.333695 | 1.177739  | 1.053572  |
| C69 | 13.791419 | 2.920449  | 2.195143  |
| H70 | 13.362996 | 3.458662  | 1.348840  |
| C71 | 13.773611 | 3.548171  | 3.447963  |
| C72 | 11.558534 | 9.643118  | 4.962221  |
| C73 | 11.706781 | 9.413468  | 3.581508  |
| C74 | 11.414618 | 10.408301 | 2.657347  |
| C75 | 10.974544 | 11.643606 | 3.138464  |
| C76 | 10.831695 | 11.872721 | 4.505493  |

|                 |           |           |           |
|-----------------|-----------|-----------|-----------|
| C77             | 11.122548 | 10.873704 | 5.437205  |
| H80             | 11.511083 | 10.212952 | 1.590328  |
| H81             | 10.732528 | 12.434541 | 2.432357  |
| H82             | 10.479395 | 12.840463 | 4.855039  |
| H83             | 10.990335 | 11.032054 | 6.506643  |
| Na80            | 14.344903 | 9.042791  | 4.720970  |
| 80              |           |           |           |
| 3c Na+ - TS dis |           |           |           |
| Na80            | 14.856176 | 8.575380  | 4.241735  |
| N1              | 12.526247 | 8.669578  | 5.501251  |
| N2              | 12.329430 | 8.242269  | 3.237741  |
| B3              | 12.425234 | 7.543095  | 4.538441  |
| C4              | 12.366848 | 8.640064  | 6.925740  |
| C5              | 11.064994 | 8.626698  | 7.451031  |
| C6              | 10.908446 | 8.598539  | 8.832709  |
| H7              | 9.899288  | 8.578423  | 9.246664  |
| C8              | 11.999816 | 8.591206  | 9.699010  |
| C9              | 13.276880 | 8.645418  | 9.150276  |
| H10             | 14.143033 | 8.672297  | 9.813139  |
| C11             | 13.480801 | 8.677127  | 7.770834  |
| C12             | 9.870357  | 8.631253  | 6.548728  |
| H13             | 8.948797  | 8.758465  | 7.125528  |
| H14             | 9.802594  | 7.675065  | 6.012493  |
| H15             | 9.920425  | 9.437079  | 5.804656  |
| C16             | 11.796595 | 8.521460  | 11.182884 |
| H17             | 12.664643 | 8.907055  | 11.728492 |
| H18             | 11.638153 | 7.485877  | 11.509014 |
| H19             | 10.915959 | 9.094524  | 11.494945 |
| C20             | 14.877481 | 8.786758  | 7.231273  |
| H21             | 15.598761 | 8.930788  | 8.041985  |
| H22             | 14.977021 | 9.664216  | 6.570080  |
| H23             | 15.182697 | 7.877835  | 6.691908  |
| C24             | 12.020395 | 7.722044  | 1.945776  |
| C25             | 10.682257 | 7.426283  | 1.644624  |
| C26             | 10.382842 | 6.915385  | 0.384366  |
| H27             | 9.345629  | 6.675424  | 0.145816  |
| C28             | 11.369783 | 6.700139  | -0.576549 |
| C29             | 12.686045 | 7.023019  | -0.255073 |
| H30             | 13.470747 | 6.871465  | -0.998315 |
| C31             | 13.030249 | 7.531957  | 0.997090  |
| C32             | 9.612048  | 7.615665  | 2.676209  |
| H33             | 8.621904  | 7.412805  | 2.256218  |
| H34             | 9.610918  | 8.637918  | 3.076634  |
| H35             | 9.761946  | 6.938797  | 3.530210  |
| C36             | 11.020782 | 6.118493  | -1.913908 |
| H37             | 11.756022 | 6.392729  | -2.678037 |
| H38             | 10.035121 | 6.456166  | -2.253172 |
| H39             | 10.988750 | 5.022578  | -1.870087 |
| C40             | 14.463685 | 7.839350  | 1.318468  |
| H41             | 15.102217 | 7.710224  | 0.438366  |
| H42             | 14.847114 | 7.159143  | 2.096320  |
| H43             | 14.583112 | 8.885290  | 1.644869  |
| C44             | 12.384450 | 9.886470  | 4.821939  |
| C45             | 12.260883 | 9.627156  | 3.445490  |
| C46             | 12.116000 | 10.664856 | 2.533386  |
| C47             | 12.100130 | 11.972189 | 3.024177  |
| C48             | 12.224264 | 12.229615 | 4.388133  |
| C49             | 12.367986 | 11.188225 | 5.307205  |
| H50             | 11.999933 | 10.452347 | 1.471697  |
| H51             | 11.980337 | 12.800200 | 2.329381  |
| H52             | 12.199602 | 13.256220 | 4.746180  |
| H53             | 12.440050 | 11.375261 | 6.377603  |
| Ru54            | 12.870937 | 5.667709  | 5.010440  |
| C155            | 10.963088 | 5.287629  | 6.332762  |
| C156            | 15.287760 | 6.056661  | 4.714635  |
| O57             | 12.556647 | 2.522324  | 4.821806  |
| C58             | 12.445823 | 4.893359  | 3.427849  |
| H59             | 11.764746 | 5.348257  | 2.693247  |
| C60             | 12.450516 | 1.344565  | 5.624536  |
| H61             | 13.407336 | 0.797479  | 5.580416  |
| C62             | 12.212967 | 1.833609  | 7.035438  |
| H63             | 13.052907 | 2.445248  | 7.381630  |
| H64             | 12.085577 | 0.985129  | 7.717489  |
| H65             | 11.314423 | 2.461392  | 7.064723  |
| C66             | 11.314599 | 0.476691  | 5.117601  |
| H67             | 11.460902 | 0.177131  | 4.073887  |
| H68             | 10.374479 | 1.037241  | 5.184045  |
| H69             | 11.220402 | -0.430436 | 5.725882  |
| C70             | 13.178080 | 2.496619  | 3.623592  |
| C71             | 13.805756 | 1.382825  | 3.066626  |
| H72             | 13.776508 | 0.420575  | 3.569977  |
| C73             | 14.479627 | 1.504087  | 1.854810  |

|                |           |           |           |
|----------------|-----------|-----------|-----------|
| H74            | 14.972385 | 0.629496  | 1.434906  |
| C75            | 14.518551 | 2.717270  | 1.178847  |
| H76            | 15.037129 | 2.801448  | 0.226876  |
| C77            | 13.861828 | 3.816126  | 1.718792  |
| H78            | 13.831938 | 4.765476  | 1.180488  |
| C79            | 13.215523 | 3.737337  | 2.954887  |
| 80             |           |           |           |
| 3c Na+ - P dis |           |           |           |
| Na80           | 14.618690 | 8.764525  | 3.833894  |
| Ru9            | 13.237160 | 5.764880  | 5.228999  |
| C110           | 11.640141 | 5.167920  | 6.833139  |
| C111           | 15.510957 | 6.430316  | 4.560595  |
| O12            | 11.468507 | 2.948431  | 2.149074  |
| N13            | 12.548871 | 8.716565  | 5.519179  |
| N14            | 12.048307 | 8.024880  | 3.365111  |
| B15            | 12.449831 | 7.488608  | 4.688465  |
| C16            | 12.655339 | 8.831694  | 6.944123  |
| C17            | 11.492087 | 8.676545  | 7.715629  |
| C18            | 11.591431 | 8.806406  | 9.097293  |
| H19            | 10.692642 | 8.679892  | 9.702555  |
| C20            | 12.800458 | 9.095753  | 9.726720  |
| C21            | 13.927603 | 9.284838  | 8.933560  |
| H22            | 14.876689 | 9.542604  | 9.405985  |
| C23            | 13.875225 | 9.164006  | 7.545194  |
| C24            | 10.174363 | 8.380146  | 7.070734  |
| H25            | 9.360659  | 8.453945  | 7.799158  |
| H26            | 10.172965 | 7.359307  | 6.665325  |
| H27            | 9.959249  | 9.073960  | 6.247718  |
| C28            | 12.879472 | 9.197142  | 11.220579 |
| H29            | 13.747258 | 9.784171  | 11.540343 |
| H30            | 12.969514 | 8.203715  | 11.677542 |
| H31            | 11.980100 | 9.662854  | 11.639582 |
| C32            | 15.110166 | 9.425882  | 6.733428  |
| H33            | 15.923571 | 9.792728  | 7.367580  |
| H34            | 14.928318 | 10.208953 | 5.978901  |
| H35            | 15.475981 | 8.511777  | 6.243400  |
| C36            | 11.572357 | 7.354012  | 2.196356  |
| C37            | 10.221472 | 6.974878  | 2.145020  |
| C38            | 9.741422  | 6.381096  | 0.980897  |
| H39            | 8.688418  | 6.096590  | 0.931484  |
| C40            | 10.565265 | 6.144275  | -0.120875 |
| C41            | 11.905412 | 6.509275  | -0.030221 |
| H42            | 12.568652 | 6.321747  | -0.876264 |
| C43            | 12.422993 | 7.121822  | 1.111494  |
| C44            | 9.333136  | 7.182374  | 3.333265  |
| H45            | 8.308586  | 6.861693  | 3.120147  |
| H46            | 9.304377  | 8.236282  | 3.640609  |
| H47            | 9.696360  | 6.607099  | 4.196924  |
| C48            | 10.008372 | 5.534357  | -1.374183 |
| H49            | 9.335086  | 6.231290  | -1.889435 |
| H50            | 9.425821  | 4.628402  | -1.159520 |
| H51            | 10.802990 | 5.261292  | -2.077782 |
| C52            | 13.871330 | 7.506334  | 1.167718  |
| H53            | 14.380995 | 7.267305  | 0.229106  |
| H54            | 14.395757 | 6.963521  | 1.968958  |
| H55            | 13.984462 | 8.593025  | 1.316064  |
| C56            | 12.726844 | 4.751398  | 3.792594  |
| H57            | 11.958154 | 5.070509  | 3.079024  |
| C58            | 10.798637 | 2.167487  | 1.158990  |
| H59            | 10.795539 | 1.111014  | 1.471753  |
| C60            | 9.373979  | 2.674110  | 1.141166  |
| H61            | 8.884946  | 2.492753  | 2.103341  |
| H62            | 8.796349  | 2.177853  | 0.352773  |
| H63            | 9.372966  | 3.755740  | 0.959824  |
| C64            | 11.500281 | 2.327421  | -0.176192 |
| H65            | 12.524464 | 1.939807  | -0.144972 |
| H66            | 11.549962 | 3.394317  | -0.429220 |
| H67            | 10.956078 | 1.802496  | -0.970167 |
| C68            | 12.608989 | 2.503075  | 2.721307  |
| C69            | 13.144798 | 1.231485  | 2.513150  |
| H70            | 12.675678 | 0.535729  | 1.823825  |
| C71            | 14.287234 | 0.835993  | 3.199751  |
| H72            | 14.687050 | -0.161478 | 3.028480  |
| C73            | 14.917153 | 1.697463  | 4.090913  |
| H74            | 15.812349 | 1.385663  | 4.622315  |
| C75            | 14.401285 | 2.968791  | 4.278581  |
| H76            | 14.911912 | 3.664279  | 4.944459  |
| C77            | 13.249306 | 3.410161  | 3.605021  |
| C87            | 11.834008 | 9.408100  | 3.465255  |
| C88            | 12.140328 | 9.827305  | 4.773075  |
| C89            | 12.037755 | 11.163859 | 5.140941  |
| C90            | 11.619862 | 12.079117 | 4.172555  |

C91 11.316581 11.665571 2.876769  
 C92 11.419678 10.322831 2.505133  
 H95 12.256654 11.469775 6.162814  
 H96 11.523214 13.129262 4.438426  
 H97 10.986601 12.396737 2.142436  
 H98 11.166254 9.988831 1.500069  
 73  
 4a - S  
 Ru1 12.882021 5.701526 5.250548  
 C12 10.845170 4.884684 6.219505  
 C13 15.097958 6.577164 5.001478  
 O4 13.844900 3.842957 5.927164  
 N5 11.840673 8.505405 5.530304  
 N6 11.428112 7.978698 3.536066  
 N7 11.984913 7.512502 4.670481  
 C8 12.328083 8.371593 6.874429  
 C9 11.445851 7.904467 7.856892  
 C10 11.967009 7.728430 9.136320  
 H11 11.312477 7.346906 9.920519  
 C12 13.292793 8.040786 9.438651  
 C13 14.098223 8.600919 8.447739  
 H14 15.118015 8.901473 8.689376  
 C15 13.632296 8.799806 7.150710  
 C16 9.985913 7.709276 7.585958  
 H17 9.559523 6.970026 8.270319  
 H18 9.787080 7.363518 6.567790  
 H19 9.453935 8.659016 7.736020  
 C20 13.841338 7.776363 10.808228  
 H21 14.662504 8.458198 11.053274  
 H22 14.236475 6.753864 10.876070  
 H23 13.068947 7.875857 11.578532  
 C24 14.456286 9.538632 6.142227  
 H25 15.523377 9.414646 6.347695  
 H26 14.221361 10.610854 6.191229  
 H27 14.279660 9.196711 5.118879  
 C28 11.387345 7.225432 2.329146  
 C29 10.257522 6.442303 2.071922  
 C30 10.240251 5.712391 0.886778  
 H31 9.376958 5.083394 0.665628  
 C32 11.297492 5.769404 -0.023334  
 C33 12.393308 6.582389 0.265132  
 H34 13.220702 6.638385 -0.443173  
 C35 12.458092 7.332460 1.438400  
 C36 9.131899 6.378107 3.056219  
 H37 8.315339 5.757531 2.674758  
 H38 8.733595 7.380843 3.256732  
 H39 9.464565 5.952450 4.014788  
 C40 11.235447 4.988831 -1.302764  
 H41 12.228736 4.858822 -1.745095  
 H42 10.610141 5.500639 -2.045503  
 H43 10.797526 3.996141 -1.146327  
 C44 13.639577 8.193755 1.758575  
 H45 14.334314 8.232078 0.914041  
 H46 14.187206 7.809757 2.632638  
 H47 13.325021 9.219915 1.988044  
 C48 12.838268 4.736251 3.695332  
 H49 12.399666 5.094654 2.759273  
 C50 14.184352 3.476573 7.297021  
 H51 15.169356 2.989097 7.242258  
 C52 14.310310 4.762173 8.078871  
 H53 15.019848 5.447952 7.602968  
 H54 14.665319 4.527017 9.089396  
 H55 13.334892 5.261620 8.171956  
 C56 13.127550 2.545961 7.850295  
 H57 13.036260 1.625665 7.263875  
 H58 12.156448 3.054272 7.842410  
 H59 13.382291 2.271312 8.880387  
 C60 13.971107 2.953542 4.906928  
 C61 14.574395 1.706964 4.986850  
 H62 14.991416 1.334558 5.917441  
 C63 14.638740 0.928557 3.832620  
 H64 15.112304 -0.049131 3.887647  
 C65 14.111711 1.372573 2.621546  
 H66 14.173721 0.743958 1.737396  
 C67 13.510055 2.619440 2.555397  
 H68 13.091243 2.996494 1.623158  
 C69 13.432327 3.427982 3.695911  
 C70 11.222484 9.586286 5.016918  
 C71 10.907340 9.307606 3.658671  
 H72 11.047084 10.466029 5.617039  
 O73 10.365431 9.912644 2.750368  
 73

4a - S - cis  
 Ru1 12.894423 5.700453 5.368826  
 C12 10.736652 5.021860 5.981319  
 C13 13.822483 4.127269 6.838432  
 O4 15.070327 6.059763 4.394461  
 N5 11.522004 8.406665 5.639602  
 N6 11.216281 7.819638 3.637118  
 N7 11.961256 7.552104 4.730874  
 C8 12.146207 8.449577 6.934540  
 C9 11.477802 7.951540 8.056409  
 C10 12.168647 8.004453 9.269103  
 H11 11.680715 7.602374 10.157522  
 C12 13.437763 8.560292 9.380182  
 C13 14.025173 9.123943 8.244367  
 H14 14.998356 9.609684 8.327519  
 C15 13.395871 9.086617 7.007867  
 C16 10.071556 7.437521 8.042418  
 H17 10.031878 6.429451 8.468008  
 H18 9.644193 7.375477 7.040382  
 H19 9.440042 8.090396 8.658694  
 C20 14.162897 8.560486 10.691439  
 H21 14.852244 9.407962 10.771243  
 H22 14.756430 7.644635 10.803350  
 H23 13.467932 8.601239 11.536706  
 C24 14.000006 9.745452 5.803706  
 H25 14.900679 10.303475 6.079202  
 H26 13.295154 10.447408 5.338227  
 H27 14.273533 9.015719 5.030787  
 C28 11.461468 7.200917 2.378558  
 C29 10.499851 6.315064 1.873341  
 C30 10.747044 5.744529 0.627416  
 H31 10.019406 5.041259 0.219256  
 C32 11.892218 6.048034 -0.108643  
 C33 12.804428 6.960362 0.416242  
 H34 13.703720 7.206212 -0.150410  
 C35 12.606316 7.557496 1.657542  
 C36 9.254219 6.005024 2.641321  
 H37 8.681706 5.211470 2.150981  
 H38 8.622423 6.900600 2.703420  
 H39 9.482334 5.687944 3.668849  
 C40 12.129076 5.397252 -1.438599  
 H41 13.154215 5.558641 -1.789288  
 H42 11.448583 5.791758 -2.203668  
 H43 11.955123 4.314749 -1.385672  
 C44 13.601818 8.533560 2.204694  
 H45 14.290601 8.864131 1.420818  
 H46 14.200280 8.081938 3.009026  
 H47 13.107907 9.420161 2.623620  
 C48 12.783213 4.772759 3.805490  
 H49 11.885779 4.179033 3.579462  
 C50 16.365370 6.172049 5.072559  
 H51 17.000500 6.793771 4.421735  
 C52 16.127196 6.901159 6.369489  
 H53 15.702938 7.893973 6.198375  
 H54 17.083485 7.024582 6.890681  
 H55 15.452387 6.324826 7.014763  
 C56 16.979139 4.805291 5.290948  
 H57 17.184810 4.279703 4.353648  
 H58 16.299876 4.194776 5.896876  
 H59 17.927394 4.919524 5.828368  
 C60 15.059046 5.430310 3.177217  
 C61 16.107941 5.476778 2.267049  
 H62 17.016708 6.029150 2.488313  
 C63 15.994648 4.782813 1.064345  
 H64 16.823085 4.812894 0.359854  
 C65 14.850763 4.049749 0.759500  
 H66 14.783732 3.501438 -0.177057  
 C67 13.794668 4.035238 1.657076  
 H68 12.877452 3.491430 1.433987  
 C69 13.877444 4.731375 2.870844  
 C70 10.550827 9.221465 5.193802  
 C71 10.274984 8.876414 3.837962  
 H72 10.128393 9.989303 5.824085  
 O73 9.510345 9.292461 2.985219  
 85  
 4a - TS inter  
 C80 14.442916 3.778596 7.596930  
 C81 13.563324 4.395492 8.423297  
 H82 13.744005 5.459907 8.611726  
 C83 12.451404 3.773963 9.196337  
 H84 12.596799 3.945813 10.270797  
 H85 11.489846 4.224884 8.915406

|              |           |           |           |      |           |           |           |
|--------------|-----------|-----------|-----------|------|-----------|-----------|-----------|
| H86          | 12.374838 | 2.694508  | 9.035020  | C2   | 14.187504 | 4.535040  | 7.075607  |
| C87          | 14.523198 | 2.320222  | 7.297276  | H3   | 15.175066 | 4.938455  | 6.847064  |
| H88          | 13.625627 | 1.767103  | 7.589046  | C4   | 13.631371 | 4.914927  | 8.412027  |
| H89          | 14.696188 | 2.146027  | 6.228084  | H5   | 13.575132 | 6.008987  | 8.517525  |
| H90          | 15.380801 | 1.882223  | 7.826610  | H6   | 12.633401 | 4.509413  | 8.593751  |
| H91          | 15.242946 | 4.399344  | 7.189517  | H7   | 14.315444 | 4.564062  | 9.198409  |
| N1           | 11.501495 | 8.330531  | 5.550830  | Ru9  | 12.933115 | 5.597066  | 5.535803  |
| N2           | 11.228439 | 7.190125  | 3.786002  | C110 | 10.763914 | 5.161962  | 6.560368  |
| N3           | 11.990587 | 7.275960  | 4.907647  | C111 | 15.111150 | 6.348390  | 4.756865  |
| C4           | 12.111257 | 8.797447  | 6.771781  | O12  | 10.943129 | 2.713305  | 2.774381  |
| C5           | 11.513732 | 8.511301  | 8.002548  | N13  | 11.971606 | 8.587229  | 5.477104  |
| C6           | 12.196172 | 8.934333  | 9.144602  | N14  | 11.982359 | 7.965986  | 3.468915  |
| H7           | 11.762907 | 8.708163  | 10.119796 | N15  | 12.137702 | 7.512918  | 4.729450  |
| C8           | 13.385504 | 9.652022  | 9.072827  | C16  | 12.127267 | 8.521381  | 6.905379  |
| C9           | 13.885462 | 9.995307  | 7.816984  | C17  | 10.990997 | 8.286165  | 7.686313  |
| H10          | 14.797910 | 10.587826 | 7.746033  | C18  | 11.179299 | 8.199005  | 9.062341  |
| C11          | 13.270936 | 9.575027  | 6.645470  | H19  | 10.318618 | 7.985642  | 9.696435  |
| C12          | 10.166277 | 7.871975  | 8.147096  | C20  | 12.433653 | 8.377069  | 9.645388  |
| H13          | 10.166819 | 7.154513  | 8.975862  | C21  | 13.517210 | 8.700172  | 8.829095  |
| H14          | 9.848011  | 7.330670  | 7.254556  | H22  | 14.491088 | 8.893232  | 9.280393  |
| H15          | 9.416298  | 8.640232  | 8.378259  | C23  | 13.390694 | 8.793972  | 7.443855  |
| C16          | 14.122866 | 10.050352 | 10.314992 | C24  | 9.624011  | 8.207168  | 7.081918  |
| H17          | 14.545110 | 11.057595 | 10.226384 | H25  | 8.927046  | 7.719358  | 7.769396  |
| H18          | 14.960451 | 9.366227  | 10.500952 | H26  | 9.621575  | 7.633755  | 6.150476  |
| H19          | 13.474665 | 10.026091 | 11.196989 | H27  | 9.244553  | 9.215906  | 6.868320  |
| C20          | 13.849627 | 9.929868  | 5.311638  | C28  | 12.618430 | 8.202395  | 11.122465 |
| H21          | 14.483216 | 10.818502 | 5.393371  | H29  | 13.452052 | 8.803916  | 11.500534 |
| H22          | 13.075722 | 10.128986 | 4.560211  | H30  | 12.839371 | 7.152862  | 11.360122 |
| H23          | 14.473573 | 9.102147  | 4.950695  | H31  | 11.715317 | 8.476349  | 11.678432 |
| C24          | 11.550315 | 6.302849  | 2.714441  | C32  | 14.533341 | 9.260039  | 6.595140  |
| C25          | 10.663840 | 5.262470  | 2.400654  | H33  | 15.481762 | 9.151317  | 7.130163  |
| C26          | 11.025324 | 4.401298  | 1.366982  | H34  | 14.409411 | 10.322717 | 6.347180  |
| H27          | 10.356154 | 3.576683  | 1.115399  | H35  | 14.618592 | 8.702384  | 5.656134  |
| C28          | 12.193617 | 4.580205  | 0.628343  | C36  | 12.056875 | 7.111639  | 2.330820  |
| C29          | 12.998304 | 5.681896  | 0.913041  | C37  | 10.949244 | 6.323193  | 2.001018  |
| H30          | 13.888625 | 5.865195  | 0.309143  | C38  | 11.049102 | 5.515176  | 0.871548  |
| C31          | 12.691461 | 6.565321  | 1.945027  | H39  | 10.198827 | 4.892168  | 0.593022  |
| C32          | 9.342310  | 5.128208  | 3.085793  | C40  | 12.198861 | 5.493356  | 0.084012  |
| H33          | 8.833122  | 4.210968  | 2.771679  | C41  | 13.253319 | 6.343667  | 0.413908  |
| H34          | 8.709878  | 5.986213  | 2.822667  | H42  | 14.141020 | 6.366731  | -0.219759 |
| H35          | 9.450654  | 5.121002  | 4.176970  | C43  | 13.198743 | 7.183624  | 1.522600  |
| C36          | 12.571756 | 3.603975  | -0.443474 | C44  | 9.690712  | 6.366828  | 2.814367  |
| H37          | 13.277394 | 4.039932  | -1.158922 | H45  | 8.924673  | 5.720094  | 2.372210  |
| H38          | 11.693826 | 3.253809  | -0.998262 | H46  | 9.290567  | 7.389052  | 2.855896  |
| H39          | 13.053260 | 2.719753  | -0.002085 | H47  | 9.843948  | 6.041383  | 3.853829  |
| C40          | 13.552664 | 7.763751  | 2.206594  | C48  | 12.307522 | 4.570175  | -1.092004 |
| H41          | 14.250258 | 7.924808  | 1.378711  | H49  | 12.896074 | 5.015002  | -1.902435 |
| H42          | 14.143716 | 7.662068  | 3.128214  | H50  | 11.321623 | 4.305154  | -1.491629 |
| H43          | 12.944096 | 8.670980  | 2.317994  | H51  | 12.808987 | 3.636300  | -0.799724 |
| C44          | 10.494484 | 8.932990  | 4.906073  | C52  | 14.286111 | 8.171355  | 1.804037  |
| C45          | 10.250170 | 8.219630  | 3.693366  | H53  | 15.142401 | 8.007080  | 1.142380  |
| O58          | 9.484499  | 8.368797  | 2.756602  | H54  | 14.635847 | 8.097640  | 2.840875  |
| H47          | 10.043394 | 9.834781  | 5.291987  | H55  | 13.909340 | 9.189421  | 1.639090  |
| Ru48         | 12.868269 | 5.688937  | 5.981711  | C56  | 12.445495 | 4.526500  | 4.087223  |
| C149         | 10.603817 | 5.016073  | 6.417540  | H57  | 11.365304 | 4.615342  | 3.925664  |
| C150         | 14.987222 | 6.840555  | 6.327831  | C58  | 10.042517 | 1.731897  | 2.245307  |
| O51          | 12.184041 | 2.523301  | 5.268414  | H59  | 10.580461 | 0.773700  | 2.164728  |
| C52          | 13.615405 | 4.927025  | 4.480910  | C60  | 8.938258  | 1.607832  | 3.270327  |
| H53          | 14.167396 | 5.671771  | 3.889308  | H61  | 9.335337  | 1.286095  | 4.237802  |
| C54          | 11.165009 | 1.515576  | 5.432360  | H62  | 8.186670  | 0.883670  | 2.937957  |
| H55          | 11.610551 | 0.528586  | 5.236116  | H63  | 8.450078  | 2.579732  | 3.410063  |
| C56          | 10.713968 | 1.545182  | 6.873226  | C64  | 9.518159  | 2.164032  | 0.890480  |
| H57          | 11.529183 | 1.266069  | 7.550081  | H65  | 10.326286 | 2.356455  | 0.175048  |
| H58          | 9.899399  | 0.824676  | 7.011489  | H66  | 8.931198  | 3.085094  | 1.000050  |
| H59          | 10.357726 | 2.545136  | 7.140619  | H67  | 8.862990  | 1.392272  | 0.470490  |
| C60          | 10.036091 | 1.804253  | 4.464931  | C68  | 12.243087 | 2.723340  | 2.432219  |
| H61          | 10.391788 | 1.840268  | 3.427617  | C69  | 12.803316 | 1.884483  | 1.468098  |
| H62          | 9.596669  | 2.778280  | 4.712353  | H70  | 12.184000 | 1.194261  | 0.902844  |
| H63          | 9.258447  | 1.035390  | 4.537020  | C71  | 14.171970 | 1.930884  | 1.224118  |
| C64          | 13.014498 | 2.451127  | 4.221479  | H72  | 14.593095 | 1.269781  | 0.468565  |
| C65          | 13.189221 | 1.298142  | 3.443079  | C73  | 15.000624 | 2.800961  | 1.926702  |
| H66          | 12.596512 | 0.410090  | 3.632153  | H74  | 16.066923 | 2.833314  | 1.719463  |
| C67          | 14.129644 | 1.260458  | 2.424254  | C75  | 14.454331 | 3.625798  | 2.895574  |
| H68          | 14.248464 | 0.341273  | 1.853505  | H76  | 15.074232 | 4.334000  | 3.443246  |
| C69          | 14.910655 | 2.374041  | 2.127060  | C77  | 13.075291 | 3.618527  | 3.169514  |
| H70          | 15.647835 | 2.343292  | 1.328959  | C78  | 11.711123 | 9.705052  | 4.776742  |
| C71          | 14.701511 | 3.532573  | 2.849221  | C79  | 11.696588 | 9.363232  | 3.394378  |
| H72          | 15.266862 | 4.431513  | 2.606580  | H80  | 11.561714 | 10.653207 | 5.270942  |
| C73          | 13.767100 | 3.614365  | 3.904739  | O80  | 11.510728 | 9.973633  | 2.354896  |
| 85           |           |           |           | C82  | 12.684752 | 2.501066  | 6.592533  |
| 4a - P inter |           |           |           | H83  | 12.132584 | 2.185701  | 5.698697  |
| C1           | 13.723201 | 3.522528  | 6.253134  | H84  | 13.183438 | 1.611591  | 7.003715  |

|             |           |           |           |        |           |           |           |
|-------------|-----------|-----------|-----------|--------|-----------|-----------|-----------|
| H85         | 11.953509 | 2.863961  | 7.317581  | O12    | 11.494416 | 2.530903  | 2.552436  |
| H86         | 14.394209 | 3.243240  | 5.439046  | N13    | 12.121316 | 8.577742  | 5.438592  |
| 73          |           |           |           | N14    | 11.774074 | 8.078699  | 3.409173  |
| 4a - TS dis |           |           |           | N15    | 12.072369 | 7.537345  | 4.612645  |
| N1          | 11.619985 | 8.547080  | 5.563029  | C16    | 12.406263 | 8.398110  | 6.838723  |
| N2          | 11.212890 | 7.534257  | 3.741169  | C17    | 11.348838 | 8.010118  | 7.672386  |
| N3          | 12.077830 | 7.563834  | 4.788743  | C18    | 11.642390 | 7.812888  | 9.015592  |
| C4          | 12.302344 | 8.883600  | 6.787269  | H19    | 10.842608 | 7.496969  | 9.685617  |
| C5          | 11.714657 | 8.547194  | 8.012897  | C20    | 12.929709 | 7.992998  | 9.521156  |
| C6          | 12.458775 | 8.817972  | 9.160304  | C21    | 13.928318 | 8.450288  | 8.665633  |
| H7          | 12.038154 | 8.542668  | 10.127857 | H22    | 14.924571 | 8.649459  | 9.061371  |
| C8          | 13.704639 | 9.437239  | 9.106850  | C23    | 13.690229 | 8.690057  | 7.312691  |
| C9          | 14.195706 | 9.844828  | 7.867940  | C24    | 9.958603  | 7.814301  | 7.153966  |
| H10         | 15.151678 | 10.366195 | 7.814119  | H25    | 9.234018  | 7.884767  | 7.970819  |
| C11         | 13.516048 | 9.576342  | 6.686414  | H26    | 9.860970  | 6.819155  | 6.703360  |
| C12         | 10.322586 | 8.008942  | 8.138913  | H27    | 9.692246  | 8.560441  | 6.395357  |
| H13         | 10.239642 | 7.369984  | 9.023715  | C28    | 13.225149 | 7.702793  | 10.961200 |
| H14         | 10.014177 | 7.414608  | 7.276038  | H29    | 14.106647 | 8.249363  | 11.312051 |
| H15         | 9.610921  | 8.836935  | 8.261265  | H30    | 13.422248 | 6.633075  | 11.105838 |
| C16         | 14.508789 | 9.656404  | 10.351882 | H31    | 12.378779 | 7.964719  | 11.605696 |
| H17         | 15.081617 | 10.588949 | 10.302917 | C32    | 14.745502 | 9.331205  | 6.464870  |
| H18         | 15.230367 | 8.840978  | 10.489128 | H33    | 15.743386 | 9.052155  | 6.817116  |
| H19         | 13.875332 | 9.686956  | 11.244478 | H34    | 14.663699 | 10.424689 | 6.532392  |
| C20         | 14.085530 | 10.007139 | 5.371422  | H35    | 14.680259 | 9.048415  | 5.411200  |
| H21         | 14.763334 | 10.855162 | 5.510516  | C36    | 11.396544 | 7.275881  | 2.294157  |
| H22         | 13.308545 | 10.304271 | 4.657098  | C37    | 10.199225 | 6.554187  | 2.358445  |
| H23         | 14.664627 | 9.186272  | 4.929681  | C38    | 9.859217  | 5.769106  | 1.258314  |
| C24         | 11.504917 | 6.800088  | 2.551778  | H39    | 8.929403  | 5.198867  | 1.288162  |
| C25         | 10.723515 | 5.684267  | 2.229927  | C40    | 10.667980 | 5.708004  | 0.124280  |
| C26         | 11.067929 | 4.966606  | 1.086853  | C41    | 11.836143 | 6.468631  | 0.093105  |
| H27         | 10.478889 | 4.087110  | 0.823415  | H42    | 12.469891 | 6.438410  | -0.794016 |
| C28         | 12.134706 | 5.341605  | 0.271790  | C43    | 12.220628 | 7.273461  | 1.162500  |
| C29         | 12.853140 | 6.490091  | 0.600404  | C44    | 9.331552  | 6.578890  | 3.579078  |
| H30         | 13.672780 | 6.812499  | -0.042852 | H45    | 8.334533  | 6.188227  | 3.353270  |
| C31         | 12.552448 | 7.240831  | 1.734806  | H46    | 9.217281  | 7.597329  | 3.972634  |
| C32         | 9.557512  | 5.284233  | 3.074266  | H47    | 9.760051  | 5.964982  | 4.384772  |
| H33         | 9.096326  | 4.368915  | 2.687054  | C48    | 10.273988 | 4.878942  | -1.061971 |
| H34         | 8.800844  | 6.079257  | 3.075101  | H49    | 9.787883  | 5.494495  | -1.829900 |
| H35         | 9.860834  | 5.114202  | 4.115893  | H50    | 9.568767  | 4.085049  | -0.788088 |
| C36         | 12.505586 | 4.517958  | -0.925002 | H51    | 11.148433 | 4.413456  | -1.532148 |
| H37         | 13.091049 | 5.096166  | -1.647432 | C52    | 13.460270 | 8.107864  | 1.105255  |
| H38         | 11.617379 | 4.131206  | -1.436882 | H53    | 14.008465 | 7.926852  | 0.175659  |
| H39         | 13.111267 | 3.650736  | -0.631635 | H54    | 14.126960 | 7.889549  | 1.950088  |
| C40         | 13.364769 | 8.448348  | 2.087119  | H55    | 13.196801 | 9.172253  | 1.153294  |
| H41         | 13.967852 | 8.773161  | 1.233852  | C56    | 12.692552 | 4.722608  | 3.625682  |
| H42         | 14.048848 | 8.237329  | 2.921155  | H57    | 11.886203 | 4.909736  | 2.912696  |
| H43         | 12.728432 | 9.288459  | 2.393784  | C58    | 10.768782 | 1.471937  | 1.917914  |
| C44         | 10.545188 | 9.166608  | 5.058319  | H59    | 10.847083 | 0.566486  | 2.541095  |
| C45         | 10.199788 | 8.531079  | 3.824970  | C60    | 9.329938  | 1.932156  | 1.886468  |
| O46         | 9.342240  | 8.718657  | 2.981745  | H61    | 8.958770  | 2.123430  | 2.897991  |
| H47         | 10.114333 | 10.027362 | 5.547213  | H62    | 8.694835  | 1.175978  | 1.412966  |
| Ru48        | 13.058661 | 5.930463  | 5.601065  | H63    | 9.255114  | 2.863489  | 1.310865  |
| C149        | 10.985082 | 5.188909  | 6.423945  | C64    | 11.322428 | 1.222259  | 0.528949  |
| C150        | 15.202870 | 6.800379  | 6.109692  | H65    | 12.378174 | 0.932240  | 0.550031  |
| O51         | 11.954645 | 2.724213  | 4.753341  | H66    | 11.234563 | 2.139964  | -0.066204 |
| C52         | 13.502041 | 5.042650  | 4.084863  | H67    | 10.758544 | 0.428214  | 0.026583  |
| H53         | 13.588171 | 5.560261  | 3.121582  | C68    | 12.715039 | 2.307992  | 3.073410  |
| C54         | 11.096292 | 1.584784  | 4.900916  | C69    | 13.337674 | 1.062410  | 3.138161  |
| H55         | 11.533234 | 0.899779  | 5.644720  | H70    | 12.858819 | 0.179197  | 2.726286  |
| C56         | 9.779260  | 2.099182  | 5.432250  | C71    | 14.584716 | 0.939375  | 3.743289  |
| H57         | 9.914895  | 2.606566  | 6.391011  | H72    | 15.052797 | -0.041945 | 3.785187  |
| H58         | 9.079029  | 1.265614  | 5.557613  | C73    | 15.240852 | 2.043936  | 4.274647  |
| H59         | 9.343157  | 2.819252  | 4.729361  | H74    | 16.225258 | 1.939661  | 4.722020  |
| C60         | 10.937662 | 0.893608  | 3.560199  | C75    | 14.637219 | 3.288568  | 4.197586  |
| H61         | 11.894053 | 0.543704  | 3.156909  | H76    | 15.172083 | 4.175488  | 4.542279  |
| H62         | 10.501377 | 1.599884  | 2.842283  | C77    | 13.367549 | 3.449206  | 3.611121  |
| H63         | 10.266359 | 0.032086  | 3.648105  | C78    | 11.843926 | 9.746728  | 4.841460  |
| C64         | 13.280226 | 2.554668  | 4.610532  | C79    | 11.601581 | 9.496008  | 3.459086  |
| C65         | 13.941439 | 1.331764  | 4.780929  | H80    | 11.792855 | 10.664022 | 5.408612  |
| H66         | 13.390222 | 0.448556  | 5.087915  | O73    | 11.299161 | 10.187692 | 2.503417  |
| C67         | 15.305541 | 1.227709  | 4.551191  | 76     |           |           |           |
| H68         | 15.791749 | 0.265427  | 4.697669  | 4b - s |           |           |           |
| C69         | 16.046800 | 2.326332  | 4.126188  | Ru1    | 12.889636 | 5.679968  | 5.261517  |
| H70         | 17.113825 | 2.238465  | 3.940998  | C12    | 10.685779 | 4.997350  | 5.895130  |
| C71         | 15.402460 | 3.538096  | 3.952179  | C13    | 15.167611 | 6.435144  | 5.354760  |
| H72         | 15.963554 | 4.421801  | 3.650013  | O4     | 13.652813 | 3.738293  | 5.978608  |
| C73         | 14.025210 | 3.682654  | 4.192766  | N5     | 11.793347 | 8.457905  | 5.574468  |
| 73          |           |           |           | N6     | 11.330795 | 7.873420  | 3.596242  |
| 4a - P dis  |           |           |           | N7     | 12.098491 | 7.538887  | 4.658130  |
| Ru9         | 13.112496 | 5.813403  | 5.030066  | C8     | 12.470775 | 8.452168  | 6.843452  |
| C110        | 11.700545 | 4.870695  | 6.682197  | C9     | 11.831952 | 7.926677  | 7.971906  |
| C111        | 15.108022 | 6.805393  | 4.207658  | C10    | 12.574638 | 7.882894  | 9.153852  |

|              |           |           |           |               |           |           |           |
|--------------|-----------|-----------|-----------|---------------|-----------|-----------|-----------|
| H11          | 12.108194 | 7.457743  | 10.044139 | C15           | 13.644247 | 9.160822  | 6.936854  |
| C12          | 13.874559 | 8.373622  | 9.228157  | C16           | 10.344759 | 7.522195  | 8.057473  |
| C13          | 14.424857 | 8.986596  | 8.101910  | H17           | 10.316955 | 6.483037  | 8.402407  |
| H14          | 15.422904 | 9.421406  | 8.160891  | H18           | 9.860081  | 7.537526  | 7.079482  |
| C15          | 13.740363 | 9.048567  | 6.895268  | H19           | 9.759182  | 8.129056  | 8.760506  |
| C16          | 10.397240 | 7.493902  | 7.991846  | C20           | 14.532005 | 8.580426  | 10.582558 |
| H17          | 10.294053 | 6.507412  | 8.457668  | H21           | 15.109711 | 9.501666  | 10.718960 |
| H18          | 9.954933  | 7.419490  | 6.995930  | H22           | 15.245854 | 7.746761  | 10.587278 |
| H19          | 9.811028  | 8.205216  | 8.589366  | H23           | 13.876645 | 8.453845  | 11.450077 |
| C20          | 14.675635 | 8.245761  | 10.488458 | C24           | 14.236229 | 9.805598  | 5.719917  |
| H21          | 15.357092 | 9.093257  | 10.620707 | H25           | 15.133112 | 10.375690 | 5.982466  |
| H22          | 15.293208 | 7.338202  | 10.460786 | H26           | 13.526309 | 10.491651 | 5.237985  |
| H23          | 14.034042 | 8.178290  | 11.373302 | H27           | 14.514326 | 9.061509  | 4.962335  |
| C24          | 14.345009 | 9.727249  | 5.706102  | C28           | 11.634637 | 7.316986  | 2.333592  |
| H25          | 15.105882 | 10.447169 | 6.023244  | C29           | 10.625734 | 6.508397  | 1.791185  |
| H26          | 13.595843 | 10.260183 | 5.107521  | C30           | 10.867984 | 5.928327  | 0.548587  |
| H27          | 14.828386 | 8.984439  | 5.059242  | H31           | 10.101893 | 5.284567  | 0.113381  |
| C28          | 11.476224 | 7.232577  | 2.332846  | C32           | 12.056164 | 6.144417  | -0.148785 |
| C29          | 10.412900 | 6.454193  | 1.858389  | C33           | 13.017816 | 6.981141  | 0.411942  |
| C30          | 10.575473 | 5.830070  | 0.625095  | H34           | 13.951948 | 7.159379  | -0.123043 |
| H31          | 9.762955  | 5.214580  | 0.236793  | C35           | 12.826016 | 7.586726  | 1.650378  |
| C32          | 11.743574 | 5.973927  | -0.124402 | C36           | 9.337483  | 6.282529  | 2.516617  |
| C33          | 12.764683 | 6.781250  | 0.373663  | H37           | 8.723201  | 5.540973  | 1.996266  |
| H34          | 13.674800 | 6.917594  | -0.211786 | H38           | 8.773146  | 7.222169  | 2.576638  |
| C35          | 12.652737 | 7.431047  | 1.602584  | H39           | 9.511702  | 5.933758  | 3.544312  |
| C36          | 9.154055  | 6.305529  | 2.652262  | C40           | 12.285969 | 5.482107  | -1.474372 |
| H37          | 8.469249  | 5.602311  | 2.168448  | H41           | 13.330073 | 5.571749  | -1.793586 |
| H38          | 8.651193  | 7.277076  | 2.742305  | H42           | 11.657985 | 5.925280  | -2.257573 |
| H39          | 9.365936  | 5.941899  | 3.667461  | H43           | 12.035206 | 4.414287  | -1.431491 |
| C40          | 11.890957 | 5.264494  | -1.438005 | C44           | 13.878660 | 8.481542  | 2.228518  |
| H41          | 12.727638 | 5.663013  | -2.020956 | H45           | 14.604605 | 8.768934  | 1.461143  |
| H42          | 10.981924 | 5.353652  | -2.043867 | H46           | 14.425909 | 7.979349  | 3.039043  |
| H43          | 12.071316 | 4.191465  | -1.292000 | H47           | 13.442051 | 9.397310  | 2.647834  |
| C44          | 13.773356 | 8.271521  | 2.132346  | C48           | 12.764344 | 4.788394  | 3.772366  |
| H45          | 14.475218 | 8.528279  | 1.332765  | H49           | 11.835283 | 4.261065  | 3.512724  |
| H46          | 14.332484 | 7.741194  | 2.918197  | C50           | 16.377193 | 5.961812  | 5.168838  |
| H47          | 13.400992 | 9.205014  | 2.573755  | H51           | 17.075520 | 6.528580  | 4.532510  |
| C48          | 13.020560 | 4.779176  | 3.673780  | C52           | 16.128571 | 6.737945  | 6.435608  |
| H49          | 12.775011 | 5.212237  | 2.698727  | H53           | 15.763829 | 7.745287  | 6.217010  |
| C50          | 13.792029 | 3.305523  | 7.363019  | H54           | 17.067120 | 6.827721  | 6.994758  |
| H51          | 14.736653 | 2.742930  | 7.409988  | H55           | 15.396011 | 6.218699  | 7.067219  |
| C52          | 13.912752 | 4.553619  | 8.204248  | C56           | 16.894965 | 4.565389  | 5.439337  |
| H53          | 14.714552 | 5.205051  | 7.838488  | H57           | 17.102560 | 4.008645  | 4.520352  |
| H54          | 14.127410 | 4.267734  | 9.240814  | H58           | 16.155265 | 4.011237  | 6.028703  |
| H55          | 12.968431 | 5.115726  | 8.199377  | H59           | 17.827279 | 4.631667  | 6.011798  |
| C56          | 12.606396 | 2.447594  | 7.747496  | C60           | 15.101255 | 5.282924  | 3.228189  |
| H57          | 12.518505 | 1.553897  | 7.120951  | C61           | 16.185590 | 5.252967  | 2.360182  |
| H58          | 11.685579 | 3.032534  | 7.638117  | H62           | 17.123827 | 5.735603  | 2.618727  |
| H59          | 12.706854 | 2.125958  | 8.790477  | C63           | 16.066522 | 4.573309  | 1.149743  |
| C60          | 13.838190 | 2.871706  | 4.947224  | H64           | 16.921152 | 4.543553  | 0.477177  |
| C61          | 14.325312 | 1.576890  | 5.054245  | C65           | 14.883295 | 3.929366  | 0.797539  |
| H62          | 14.586725 | 1.144163  | 6.015029  | H66           | 14.810825 | 3.391737  | -0.144819 |
| C63          | 14.477883 | 0.829020  | 3.888445  | C67           | 13.796398 | 3.988147  | 1.655891  |
| H64          | 14.860461 | -0.186282 | 3.965119  | H68           | 12.850817 | 3.513559  | 1.396225  |
| C65          | 14.150962 | 1.351046  | 2.638906  | C69           | 13.884687 | 4.671852  | 2.875584  |
| H66          | 14.276568 | 0.744926  | 1.745872  | C70           | 10.780839 | 9.346358  | 5.174598  |
| C67          | 13.666178 | 2.646195  | 2.545668  | C71           | 10.506019 | 9.006521  | 3.811146  |
| H68          | 13.403266 | 3.083525  | 1.583284  | C72           | 10.203464 | 10.458799 | 5.955678  |
| C69          | 13.503429 | 3.425496  | 3.697490  | H73           | 9.615881  | 11.076408 | 5.269560  |
| C70          | 10.897494 | 9.368983  | 5.156771  | H74           | 9.535730  | 10.105467 | 6.752319  |
| C71          | 10.536217 | 9.024283  | 3.818720  | H75           | 10.976813 | 11.081962 | 6.422701  |
| C72          | 10.445770 | 10.536430 | 5.940942  | O76           | 9.748654  | 9.487767  | 2.981206  |
| H73          | 9.838826  | 11.163243 | 5.280631  |               |           |           |           |
| H74          | 9.828122  | 10.248593 | 6.801620  |               |           |           |           |
| H75          | 11.285626 | 11.132814 | 6.319640  |               |           |           |           |
| O76          | 9.780070  | 9.536221  | 3.005500  |               |           |           |           |
| 76           |           |           |           |               |           |           |           |
| 4b - S - cis |           |           |           | 4b - TS inter |           |           |           |
| Ru1          | 12.889059 | 5.702445  | 5.341660  | C1            | 14.394567 | 3.773667  | 7.697525  |
| C12          | 10.659420 | 5.186710  | 5.854456  | C2            | 13.493862 | 4.376026  | 8.511215  |
| C13          | 13.640094 | 4.076511  | 6.857703  | H3            | 13.665009 | 5.439093  | 8.714615  |
| O4           | 15.106473 | 5.914200  | 4.444123  | C4            | 12.363491 | 3.742508  | 9.247464  |
| N5           | 11.729921 | 8.502747  | 5.609079  | H5            | 12.456908 | 3.935220  | 10.323948 |
| N6           | 11.401933 | 7.934912  | 3.595695  | H6            | 11.405196 | 4.166323  | 8.916475  |
| N7           | 12.150333 | 7.637394  | 4.685700  | H7            | 12.316797 | 2.659092  | 9.102058  |
| C8           | 12.387551 | 8.532032  | 6.889507  | C8            | 14.486090 | 2.320563  | 7.377761  |
| C9           | 11.753807 | 8.025931  | 8.027526  | H9            | 13.588481 | 1.761518  | 7.656364  |
| C10          | 12.483219 | 8.055283  | 9.220000  | H10           | 14.663993 | 2.163028  | 6.306682  |
| H11          | 12.019856 | 7.640735  | 10.115856 | H11           | 15.342843 | 1.878205  | 7.904769  |
| C12          | 13.756870 | 8.602965  | 9.300329  | H12           | 15.199194 | 4.403950  | 7.314446  |
| C13          | 14.308869 | 9.182653  | 8.154300  | N13           | 11.412379 | 8.286023  | 5.687848  |
| H14          | 15.288805 | 9.658778  | 8.212833  | N14           | 11.294049 | 7.238586  | 3.842862  |
|              |           |           |           | N15           | 11.998260 | 7.294580  | 5.006256  |
|              |           |           |           | C16           | 11.942044 | 8.682067  | 6.969383  |
|              |           |           |           | C17           | 11.298745 | 8.291077  | 8.148013  |
|              |           |           |           | C18           | 11.927966 | 8.625565  | 9.349654  |



|              |           |           |           |             |           |           |           |
|--------------|-----------|-----------|-----------|-------------|-----------|-----------|-----------|
| H19          | 11.457656 | 8.313112  | 10.283362 | O12         | 11.370328 | 2.510538  | 2.664918  |
| C20          | 13.109269 | 9.358258  | 9.389048  | N13         | 11.917567 | 8.518405  | 5.561016  |
| C21          | 13.648134 | 9.820226  | 8.188110  | N14         | 11.570918 | 8.043246  | 3.533112  |
| H22          | 14.550813 | 10.431622 | 8.205108  | N15         | 11.816307 | 7.478708  | 4.739142  |
| C23          | 13.087468 | 9.492725  | 6.961822  | C16         | 12.143370 | 8.304077  | 6.965991  |
| C24          | 9.957665  | 7.622444  | 8.198112  | C17         | 11.034960 | 7.930215  | 7.743373  |
| H25          | 10.003262 | 6.694240  | 8.779180  | C18         | 11.250245 | 7.704461  | 9.096659  |
| H26          | 9.569983  | 7.353435  | 7.213703  | H19         | 10.408578 | 7.395893  | 9.717191  |
| H27          | 9.240848  | 8.288999  | 8.695879  | C20         | 12.508130 | 7.870560  | 9.678733  |
| C28          | 13.797698 | 9.650007  | 10.687803 | C21         | 13.556904 | 8.320924  | 8.883707  |
| H29          | 14.202235 | 10.668210 | 10.709483 | H22         | 14.533722 | 8.502798  | 9.334693  |
| H30          | 14.643398 | 8.966217  | 10.835127 | C23         | 13.403839 | 8.559694  | 7.515818  |
| H31          | 13.123230 | 9.529831  | 11.541846 | C24         | 9.668875  | 7.788237  | 7.149897  |
| C32          | 13.709275 | 9.977851  | 5.690154  | H25         | 8.903277  | 7.872714  | 7.927593  |
| H33          | 14.304577 | 10.877473 | 5.874787  | H26         | 9.570505  | 6.803161  | 6.676246  |
| H34          | 12.963461 | 10.212732 | 4.920560  | H27         | 9.470835  | 8.552286  | 6.387057  |
| H35          | 14.378063 | 9.204525  | 5.291502  | C28         | 12.719272 | 7.558445  | 11.129354 |
| C36          | 11.716863 | 6.431189  | 2.744322  | H29         | 13.575966 | 8.102017  | 11.541245 |
| C37          | 10.887985 | 5.384606  | 2.315501  | H30         | 12.912802 | 6.486574  | 11.268343 |
| C38          | 11.332498 | 4.607064  | 1.249260  | H31         | 11.835068 | 7.805257  | 11.727385 |
| H39          | 10.708551 | 3.778626  | 0.909914  | C32         | 14.564965 | 9.108722  | 6.743654  |
| C40          | 12.531771 | 4.872591  | 0.590823  | H33         | 15.416805 | 8.419827  | 6.785739  |
| C41          | 13.290118 | 5.966959  | 1.002836  | H34         | 14.884498 | 10.060610 | 7.187125  |
| H42          | 14.210734 | 6.211769  | 0.470344  | H35         | 14.346967 | 9.263595  | 5.684826  |
| C43          | 12.900028 | 6.767537  | 2.074141  | C36         | 11.280229 | 7.249177  | 2.385371  |
| C44          | 9.546683  | 5.151668  | 2.931478  | C37         | 10.103296 | 6.490261  | 2.364360  |
| H45          | 9.090474  | 4.237388  | 2.537720  | C38         | 9.862875  | 5.698328  | 1.241852  |
| H46          | 8.887104  | 5.998583  | 2.700867  | H39         | 8.953486  | 5.095576  | 1.210230  |
| H47          | 9.613947  | 5.075713  | 4.023566  | C40         | 10.742008 | 5.672889  | 0.161193  |
| C48          | 12.994487 | 3.990055  | -0.527989 | C41         | 11.871572 | 6.488719  | 0.199566  |
| H49          | 13.730270 | 4.493631  | -1.164178 | H42         | 12.557677 | 6.491224  | -0.648852 |
| H50          | 12.158583 | 3.668774  | -1.159782 | C43         | 12.161824 | 7.296221  | 1.294286  |
| H51          | 13.467753 | 3.082119  | -0.127776 | C44         | 9.142096  | 6.495079  | 3.513314  |
| C52          | 13.726890 | 7.947756  | 2.485266  | H45         | 8.166045  | 6.112823  | 3.197820  |
| H53          | 14.457672 | 8.195229  | 1.708870  | H46         | 9.000140  | 7.507632  | 3.911921  |
| H54          | 14.277524 | 7.761830  | 3.419178  | H47         | 9.498009  | 5.868585  | 4.346271  |
| H55          | 13.100152 | 8.832657  | 2.656687  | C48         | 10.498259 | 4.792752  | -1.028035 |
| C56          | 10.414892 | 8.883025  | 5.024454  | H49         | 10.575562 | 5.356796  | -1.965372 |
| C57          | 10.281619 | 8.216351  | 3.762430  | H50         | 9.507824  | 4.325276  | -0.994661 |
| Ru58         | 12.832717 | 5.680911  | 6.066301  | H51         | 11.251228 | 3.992447  | -1.075064 |
| C159         | 10.552718 | 4.978703  | 6.376977  | C52         | 13.363026 | 8.186585  | 1.294229  |
| C160         | 14.938199 | 6.853451  | 6.465343  | H53         | 13.990306 | 7.988967  | 0.418839  |
| O61          | 12.160699 | 2.522741  | 5.309614  | H54         | 13.968704 | 8.039028  | 2.197702  |
| C62          | 13.625797 | 4.932056  | 4.581986  | H55         | 13.047830 | 9.237791  | 1.273543  |
| H63          | 14.218772 | 5.674629  | 4.028164  | C56         | 12.473469 | 4.752676  | 3.632032  |
| C64          | 11.140065 | 1.514624  | 5.454886  | H57         | 11.378162 | 4.719154  | 3.556083  |
| H65          | 11.585329 | 0.530551  | 5.243151  | C58         | 10.602631 | 1.389670  | 2.210623  |
| C66          | 10.689595 | 1.521399  | 6.896474  | H59         | 11.297145 | 0.583876  | 1.921565  |
| H67          | 11.507330 | 1.234527  | 7.567078  | C60         | 9.791785  | 0.951717  | 3.408906  |
| H68          | 9.876741  | 0.797256  | 7.025353  | H61         | 10.443946 | 0.664975  | 4.239877  |
| H69          | 10.331621 | 2.516849  | 7.178132  | H62         | 9.155417  | 0.098537  | 3.150106  |
| C70          | 10.011214 | 1.817876  | 4.491283  | H63         | 9.153787  | 1.776247  | 3.748070  |
| H71          | 10.369359 | 1.879757  | 3.455892  | C64         | 9.729155  | 1.788922  | 1.038378  |
| H72          | 9.563846  | 2.782863  | 4.758350  | H65         | 10.317456 | 2.155357  | 0.189759  |
| H73          | 9.239488  | 1.041401  | 4.543755  | H66         | 9.046565  | 2.590200  | 1.348629  |
| C74          | 12.992625 | 2.468033  | 4.263127  | H67         | 9.130145  | 0.936518  | 0.698326  |
| C75          | 13.152505 | 1.333639  | 3.455042  | C68         | 12.474632 | 2.912727  | 2.007161  |
| H76          | 12.541610 | 0.452204  | 3.615275  | C69         | 13.009900 | 2.277653  | 0.887152  |
| C77          | 14.100914 | 1.305763  | 2.443153  | H70         | 12.517351 | 1.416007  | 0.445848  |
| H78          | 14.206534 | 0.400776  | 1.847640  | C71         | 14.198798 | 2.745368  | 0.335550  |
| C79          | 14.908933 | 2.409901  | 2.187499  | H72         | 14.606187 | 2.239888  | -0.537948 |
| H80          | 15.657766 | 2.384617  | 1.399895  | C73         | 14.875066 | 3.826365  | 0.891376  |
| C81          | 14.713139 | 3.553569  | 2.937352  | H74         | 15.807900 | 4.174595  | 0.456017  |
| H82          | 15.298580 | 4.446960  | 2.724541  | C75         | 14.353238 | 4.453698  | 2.011803  |
| C83          | 13.765114 | 3.628165  | 3.980820  | H76         | 14.854937 | 5.305474  | 2.469175  |
| C84          | 9.675691  | 10.072450 | 5.492356  | C77         | 13.133742 | 4.039548  | 2.566651  |
| H85          | 9.069153  | 10.437877 | 4.658402  | C78         | 11.729464 | 9.708276  | 4.967373  |
| H86          | 9.004388  | 9.841305  | 6.329434  | C79         | 11.489660 | 9.454165  | 3.580662  |
| H87          | 10.351534 | 10.872331 | 5.820077  | C82         | 13.342067 | 2.412471  | 5.753994  |
| O88          | 9.546129  | 8.413606  | 2.806323  | H83         | 12.704375 | 2.159776  | 4.898332  |
| 88           |           |           |           | H84         | 14.023633 | 1.566250  | 5.922971  |
| 4b - P inter |           |           |           | H85         | 12.691601 | 2.519994  | 6.624546  |
| C1           | 14.154662 | 3.638667  | 5.481449  | H86         | 14.746229 | 3.608838  | 4.564558  |
| C2           | 14.553530 | 4.588381  | 6.406957  | C86         | 11.706942 | 11.014232 | 5.657736  |
| H3           | 15.425662 | 5.190806  | 6.147792  | H87         | 11.361310 | 11.762132 | 4.937499  |
| C4           | 14.123343 | 4.664841  | 7.839223  | H88         | 11.028888 | 11.014048 | 6.520671  |
| H5           | 13.871718 | 5.698565  | 8.123825  | H89         | 12.699842 | 11.317961 | 6.014333  |
| H6           | 13.256330 | 4.038820  | 8.062226  | O88         | 11.244052 | 10.192776 | 2.637031  |
| H7           | 14.962940 | 4.363693  | 8.482061  | 76          |           |           |           |
| Ru9          | 12.957369 | 5.617767  | 5.198317  | 4b - TS dis |           |           |           |
| C110         | 11.045690 | 4.688129  | 6.385309  | N1          | 11.721920 | 8.527316  | 5.557976  |
| C111         | 14.862962 | 6.865767  | 4.339487  | N2          | 11.594990 | 7.969538  | 3.515197  |

|            |           |           |           |
|------------|-----------|-----------|-----------|
| N3         | 12.107140 | 7.580770  | 4.704340  |
| C4         | 12.190376 | 8.474850  | 6.918542  |
| C5         | 11.367031 | 7.951364  | 7.920129  |
| C6         | 11.921776 | 7.840061  | 9.196770  |
| H7         | 11.307633 | 7.418096  | 9.993413  |
| C8         | 13.212336 | 8.273258  | 9.481851  |
| C9         | 13.957234 | 8.876865  | 8.467576  |
| H10        | 14.956349 | 9.253941  | 8.687467  |
| C11        | 13.471644 | 8.989085  | 7.172115  |
| C12        | 9.926264  | 7.598847  | 7.711298  |
| H13        | 9.705468  | 6.602504  | 8.109653  |
| H14        | 9.635432  | 7.585151  | 6.659058  |
| H15        | 9.294063  | 8.318867  | 8.247906  |
| C16        | 13.801159 | 8.102281  | 10.849102 |
| H17        | 14.381420 | 8.982216  | 11.148882 |
| H18        | 14.485563 | 7.244860  | 10.869010 |
| H19        | 13.028812 | 7.926717  | 11.604800 |
| C20        | 14.303679 | 9.611906  | 6.095204  |
| H21        | 15.037732 | 10.299323 | 6.526744  |
| H22        | 13.700412 | 10.166913 | 5.366187  |
| H23        | 14.849274 | 8.828432  | 5.553587  |
| C24        | 11.884914 | 7.259133  | 2.316244  |
| C25        | 10.827530 | 6.632222  | 1.645636  |
| C26        | 11.134555 | 5.906472  | 0.494783  |
| H27        | 10.327312 | 5.398466  | -0.033784 |
| C28        | 12.437573 | 5.807754  | 0.012304  |
| C29        | 13.452202 | 6.488772  | 0.685432  |
| H30        | 14.471544 | 6.450862  | 0.295951  |
| C31        | 13.203735 | 7.225338  | 1.841420  |
| C32        | 9.424121  | 6.718991  | 2.153568  |
| H33        | 8.756446  | 6.095236  | 1.552134  |
| H34        | 9.070500  | 7.756841  | 2.111533  |
| H35        | 9.363581  | 6.383850  | 3.198402  |
| C36        | 12.756549 | 4.972225  | -1.190762 |
| H37        | 13.469543 | 5.476009  | -1.853395 |
| H38        | 11.858133 | 4.737805  | -1.770650 |
| H39        | 13.213558 | 4.019490  | -0.891959 |
| C40        | 14.321385 | 7.926755  | 2.548526  |
| H41        | 15.171457 | 8.069597  | 1.873793  |
| H42        | 14.671278 | 7.349555  | 3.418234  |
| H43        | 14.009514 | 8.911504  | 2.918702  |
| C44        | 11.013477 | 9.513342  | 4.983800  |
| C45        | 10.885043 | 9.192790  | 3.595821  |
| O46        | 10.351451 | 9.771256  | 2.660549  |
| Ru47       | 12.593081 | 5.676780  | 5.374695  |
| C148       | 10.216027 | 5.198402  | 5.480858  |
| C149       | 14.872696 | 6.204943  | 5.866248  |
| O50        | 13.046651 | 3.236570  | 5.914605  |
| C51        | 12.715811 | 4.694997  | 3.860301  |
| H52        | 12.095082 | 4.800141  | 2.960950  |
| C53        | 12.450763 | 2.321686  | 6.857170  |
| H54        | 13.235551 | 1.609937  | 7.161614  |
| C55        | 12.051397 | 3.170221  | 8.042396  |
| H56        | 12.915021 | 3.726336  | 8.425160  |
| H57        | 11.655561 | 2.537223  | 8.844113  |
| H58        | 11.272731 | 3.884653  | 7.742262  |
| C59        | 11.284896 | 1.606538  | 6.211180  |
| H60        | 11.604368 | 1.013721  | 5.346080  |
| H61        | 10.546637 | 2.346736  | 5.877656  |
| H62        | 10.808965 | 0.929504  | 6.929793  |
| C63        | 13.756168 | 2.794811  | 4.827709  |
| C64        | 14.465412 | 1.609234  | 4.726832  |
| H65        | 14.360858 | 0.820542  | 5.467300  |
| C66        | 15.352835 | 1.474099  | 3.660005  |
| H67        | 15.934841 | 0.559354  | 3.571878  |
| C68        | 15.517608 | 2.489894  | 2.721015  |
| H69        | 16.223150 | 2.360727  | 1.904087  |
| C70        | 14.739375 | 3.639393  | 2.793799  |
| H71        | 14.775355 | 4.398426  | 2.012097  |
| C72        | 13.877433 | 3.822801  | 3.877454  |
| C73        | 10.536363 | 10.726901 | 5.677219  |
| H74        | 10.084215 | 11.381501 | 4.925999  |
| H75        | 9.778805  | 10.499586 | 6.438159  |
| H76        | 11.351801 | 11.269915 | 6.172069  |
| 76         |           |           |           |
| 4b - P dis |           |           |           |
| Ru1        | 13.060443 | 5.864088  | 5.061664  |
| C12        | 11.675620 | 4.947088  | 6.756245  |
| C13        | 15.011937 | 6.894950  | 4.183428  |
| O4         | 11.536228 | 2.504100  | 2.569787  |
| N5         | 12.052050 | 8.619777  | 5.443929  |
| N6         | 11.657680 | 8.079319  | 3.427664  |
| N7         | 11.963079 | 7.552747  | 4.639925  |
| C8         | 12.342348 | 8.448425  | 6.844002  |
| C9         | 11.275395 | 8.092818  | 7.683943  |
| C10        | 11.560957 | 7.890885  | 9.026414  |
| H11        | 10.752349 | 7.598484  | 9.696873  |
| C12        | 12.855339 | 8.026498  | 9.530867  |
| C13        | 13.865807 | 8.445123  | 8.672765  |
| H14        | 14.870986 | 8.605939  | 9.064343  |
| C15        | 13.635671 | 8.690335  | 7.317370  |
| C16        | 9.883725  | 7.910846  | 7.164718  |
| H17        | 9.154706  | 8.030827  | 7.972039  |
| H18        | 9.771148  | 6.898868  | 6.755559  |
| H19        | 9.635126  | 8.625347  | 6.369999  |
| C20        | 13.137916 | 7.722881  | 10.970673 |
| H21        | 14.076185 | 8.176679  | 11.305438 |
| H22        | 13.220684 | 6.639705  | 11.125070 |
| H23        | 12.331808 | 8.079022  | 11.622075 |
| C24        | 14.742144 | 9.257423  | 6.480564  |
| H25        | 15.634724 | 8.625183  | 6.534767  |
| H26        | 15.015017 | 10.250424 | 6.861347  |
| H27        | 14.484527 | 9.344520  | 5.422569  |
| C28        | 11.274381 | 7.257316  | 2.328881  |
| C29        | 10.090667 | 6.514912  | 2.418446  |
| C30        | 9.744502  | 5.719252  | 1.328154  |
| H31        | 8.823453  | 5.135930  | 1.375717  |
| C32        | 10.533247 | 5.667258  | 0.178983  |
| C33        | 11.690815 | 6.441399  | 0.126114  |
| H34        | 12.310376 | 6.416380  | -0.770981 |
| C35        | 12.081091 | 7.257630  | 1.185078  |
| C36        | 9.240085  | 6.535639  | 3.651326  |
| H37        | 8.247139  | 6.125200  | 3.442797  |
| H38        | 9.113456  | 7.555923  | 4.036276  |
| H39        | 9.691141  | 5.938885  | 4.457402  |
| C40        | 10.119046 | 4.840556  | -1.002024 |
| H41        | 9.515137  | 5.432188  | -1.701863 |
| H42        | 9.512107  | 3.976570  | -0.704411 |
| H43        | 10.988554 | 4.472833  | -1.559371 |
| C44        | 13.308135 | 8.108312  | 1.101672  |
| H45        | 13.850466 | 7.918382  | 0.170458  |
| H46        | 13.985039 | 7.914089  | 1.944344  |
| H47        | 13.030135 | 9.169693  | 1.133485  |
| C48        | 12.643493 | 4.732862  | 3.687907  |
| H49        | 11.822319 | 4.887173  | 2.983101  |
| C50        | 10.903471 | 1.454541  | 1.829664  |
| H51        | 11.006323 | 0.510991  | 2.389126  |
| C52        | 9.442670  | 1.833953  | 1.761845  |
| H53        | 9.010100  | 1.908642  | 2.764053  |
| H54        | 8.878918  | 1.091078  | 1.187554  |
| H55        | 9.341339  | 2.810088  | 1.271169  |
| C56        | 11.533291 | 1.339425  | 0.455672  |
| H57        | 12.601086 | 1.102206  | 0.509913  |
| H58        | 11.424168 | 2.294791  | -0.072742 |
| H59        | 11.037667 | 0.558704  | -0.132094 |
| C60        | 12.758973 | 2.323570  | 3.103858  |
| C61        | 13.431072 | 1.102814  | 3.152398  |
| H62        | 12.996083 | 0.210800  | 2.711435  |
| C63        | 14.669643 | 1.015407  | 3.779727  |
| H64        | 15.175708 | 0.052691  | 3.810239  |
| C65        | 15.269980 | 2.133598  | 4.348319  |
| H66        | 16.248184 | 2.058385  | 4.184808  |
| C67        | 14.619771 | 3.354560  | 4.281284  |
| H68        | 15.115460 | 4.254024  | 4.652368  |
| C69        | 13.355915 | 3.478988  | 3.673518  |
| C70        | 11.774743 | 9.780036  | 4.832212  |
| C71        | 11.504654 | 9.484582  | 3.457921  |
| O72        | 11.184143 | 10.189172 | 2.513102  |
| C73        | 11.686517 | 11.092272 | 5.503645  |
| H74        | 11.304667 | 11.813728 | 4.775228  |
| H75        | 11.010405 | 11.068011 | 6.367607  |
| H76        | 12.663925 | 11.444254 | 5.857687  |
| 73         |           |           |           |
| 5a - s     |           |           |           |
| Ru1        | 12.916105 | 5.742755  | 5.218314  |
| C12        | 10.873654 | 4.940926  | 6.192682  |
| C13        | 15.143733 | 6.576190  | 4.923710  |
| O4         | 13.861404 | 3.883702  | 5.925369  |
| N5         | 11.921517 | 8.569760  | 5.514359  |
| N6         | 11.535484 | 8.042097  | 3.515180  |
| N7         | 12.046482 | 7.559088  | 4.627851  |
| C8         | 12.412240 | 8.431442  | 6.847220  |
| C9         | 11.534380 | 7.993128  | 7.846955  |
| C10        | 12.061930 | 7.808144  | 9.123204  |

|              |           |           |           |               |           |           |           |
|--------------|-----------|-----------|-----------|---------------|-----------|-----------|-----------|
| H11          | 11.406026 | 7.448062  | 9.916456  | H18           | 9.956154  | 6.979737  | 7.292731  |
| C12          | 13.395086 | 8.099424  | 9.412494  | H19           | 9.609001  | 8.672653  | 7.699396  |
| C13          | 14.198296 | 8.650912  | 8.414147  | C20           | 14.356254 | 8.488400  | 10.700770 |
| H14          | 15.220532 | 8.948576  | 8.650226  | H21           | 15.062109 | 9.321141  | 10.796867 |
| C15          | 13.719958 | 8.854589  | 7.123235  | H22           | 14.934208 | 7.560014  | 10.795266 |
| C16          | 10.068724 | 7.851305  | 7.580860  | H23           | 13.662936 | 8.526941  | 11.547304 |
| H17          | 9.577724  | 7.285238  | 8.378533  | C24           | 14.293000 | 9.583974  | 5.791214  |
| H18          | 9.864225  | 7.339210  | 6.635733  | H25           | 15.254182 | 10.041835 | 6.048181  |
| H19          | 9.616854  | 8.851137  | 7.532898  | H26           | 13.656929 | 10.362120 | 5.347320  |
| C20          | 13.957552 | 7.835220  | 10.776821 | H27           | 14.472650 | 8.830414  | 5.012380  |
| H21          | 14.716201 | 8.576936  | 11.050174 | C28           | 11.628309 | 7.261239  | 2.369880  |
| H22          | 14.442383 | 6.850465  | 10.813909 | C29           | 10.621204 | 6.410510  | 1.900110  |
| H23          | 13.177270 | 7.842329  | 11.545268 | C30           | 10.822969 | 5.828659  | 0.650668  |
| C24          | 14.521940 | 9.601933  | 6.104984  | H31           | 10.064430 | 5.147374  | 0.262885  |
| H25          | 15.577217 | 9.644353  | 6.391743  | C32           | 11.961686 | 6.089459  | -0.112020 |
| H26          | 14.138524 | 10.628445 | 6.030256  | C33           | 12.920512 | 6.966091  | 0.389805  |
| H27          | 14.467326 | 9.142804  | 5.113203  | H34           | 13.818392 | 7.171817  | -0.194137 |
| C28          | 11.461422 | 7.267829  | 2.311203  | C35           | 12.776149 | 7.571434  | 1.634888  |
| C29          | 10.309848 | 6.505630  | 2.093031  | C36           | 9.388369  | 6.128739  | 2.701126  |
| C30          | 10.254011 | 5.777231  | 0.907614  | H37           | 8.788480  | 5.349767  | 2.221197  |
| H31          | 9.374141  | 5.165117  | 0.707094  | H38           | 8.760572  | 7.023385  | 2.798264  |
| C32          | 11.294937 | 5.807166  | -0.022282 | H39           | 9.635812  | 5.798028  | 3.720212  |
| C33          | 12.421882 | 6.583816  | 0.247644  | C40           | 12.145371 | 5.426866  | -1.444095 |
| H34          | 13.242651 | 6.605982  | -0.469767 | H41           | 13.165302 | 5.556934  | -1.820943 |
| C35          | 12.532550 | 7.334032  | 1.417565  | H42           | 11.457363 | 5.838132  | -2.193215 |
| C36          | 9.218686  | 6.434544  | 3.115770  | H43           | 11.941628 | 4.350542  | -1.380718 |
| H37          | 8.344616  | 5.912081  | 2.716350  | C44           | 13.827624 | 8.493987  | 2.170381  |
| H38          | 8.902503  | 7.433050  | 3.442364  | H45           | 14.511692 | 8.803519  | 1.374340  |
| H39          | 9.558813  | 5.896655  | 4.014286  | H46           | 14.422379 | 7.999502  | 2.951071  |
| C40          | 11.186950 | 5.031174  | -1.300966 | H47           | 13.390889 | 9.395694  | 2.618491  |
| H41          | 12.171387 | 4.833384  | -1.737532 | C48           | 12.809498 | 4.732650  | 3.801274  |
| H42          | 10.603040 | 5.584674  | -2.047487 | H49           | 11.906647 | 4.155091  | 3.554328  |
| H43          | 10.681124 | 4.071628  | -1.145731 | C50           | 16.414275 | 5.961663  | 5.155125  |
| C44          | 13.762863 | 8.126932  | 1.732579  | H51           | 17.091320 | 6.569365  | 4.534246  |
| H45          | 14.422773 | 8.183266  | 0.861979  | C52           | 16.200941 | 6.657149  | 6.473090  |
| H46          | 14.324767 | 7.666434  | 2.560150  | H53           | 15.840367 | 7.678482  | 6.333446  |
| H47          | 13.517708 | 9.149801  | 2.044357  | H54           | 17.156298 | 6.703259  | 7.008338  |
| C48          | 12.852798 | 4.745221  | 3.683405  | H55           | 15.484400 | 6.102641  | 7.091322  |
| H49          | 12.411330 | 5.080673  | 2.739651  | C56           | 16.946811 | 4.555252  | 5.328765  |
| C50          | 14.212526 | 3.541154  | 7.300730  | H57           | 17.137436 | 4.053079  | 4.375488  |
| H51          | 15.191079 | 3.041175  | 7.243106  | H58           | 16.226829 | 3.962495  | 5.904381  |
| C52          | 14.361947 | 4.840228  | 8.054816  | H59           | 17.891907 | 4.597089  | 5.881746  |
| H53          | 15.076676 | 5.507509  | 7.560926  | C60           | 15.108668 | 5.348160  | 3.218773  |
| H54          | 14.723212 | 4.619843  | 9.066462  | C61           | 16.169395 | 5.394013  | 2.320969  |
| H55          | 13.395397 | 5.356357  | 8.149596  | H62           | 17.086722 | 5.921134  | 2.567329  |
| C56          | 13.151857 | 2.633380  | 7.883486  | C63           | 16.057257 | 4.731727  | 1.101118  |
| H57          | 13.042737 | 1.702770  | 7.316517  | H64           | 16.894723 | 4.761336  | 0.407434  |
| H58          | 12.186532 | 3.152422  | 7.878868  | C65           | 14.902946 | 4.027718  | 0.766612  |
| H59          | 13.416485 | 2.375885  | 8.915491  | H66           | 14.837601 | 3.500181  | -0.181937 |
| C60          | 13.969150 | 2.973396  | 4.923026  | C67           | 13.836947 | 4.013073  | 1.651821  |
| C61          | 14.555020 | 1.719481  | 5.023208  | H68           | 12.913596 | 3.488994  | 1.407228  |
| H62          | 14.972727 | 1.359226  | 5.928177  | C69           | 13.916674 | 4.681995  | 2.880987  |
| C63          | 14.600355 | 0.917570  | 3.884603  | C70           | 10.826887 | 9.454756  | 5.154997  |
| H64          | 15.060044 | -0.065637 | 3.956333  | C71           | 10.695718 | 9.030674  | 3.800378  |
| C65          | 14.071761 | 1.344207  | 2.667660  | O72           | 10.403191 | 10.389189 | 5.812571  |
| H66          | 14.118912 | 0.696658  | 1.796332  | H73           | 10.163578 | 9.475705  | 2.973513  |
| C67          | 13.487603 | 2.597758  | 2.580519  | 85            |           |           |           |
| H68          | 13.067522 | 2.962087  | 1.643208  | 5a - TS inter |           |           |           |
| C69          | 13.429206 | 3.430097  | 3.705207  | C1            | 14.507269 | 4.141505  | 7.750406  |
| C70          | 11.318881 | 9.741417  | 4.968805  | C2            | 13.670502 | 4.910995  | 8.486479  |
| C71          | 11.087207 | 9.311513  | 3.632010  | H3            | 13.831027 | 5.996025  | 8.428266  |
| O72          | 11.120872 | 10.765412 | 5.600350  | C4            | 12.603205 | 4.472887  | 9.429782  |
| H73          | 10.646111 | 9.821642  | 2.789217  | H5            | 12.757011 | 4.929170  | 10.416731 |
| 73           |           |           |           | H6            | 11.619685 | 4.807666  | 9.068604  |
| 5a - s - cis |           |           |           | H7            | 12.564420 | 3.386563  | 9.557884  |
| Ru1          | 12.913318 | 5.655751  | 5.366748  | C8            | 14.617138 | 2.654324  | 7.763028  |
| C12          | 10.728426 | 5.028803  | 5.937472  | H9            | 13.863925 | 2.170599  | 8.391820  |
| C13          | 13.751309 | 4.035675  | 6.836350  | H10           | 14.528776 | 2.240222  | 6.750864  |
| O4           | 15.122974 | 5.945584  | 4.451316  | H11           | 15.607140 | 2.362199  | 8.138021  |
| N5           | 11.705715 | 8.449781  | 5.655660  | H12           | 15.260405 | 4.669640  | 7.162724  |
| N6           | 11.442044 | 7.921071  | 3.631748  | N13           | 11.419315 | 8.303917  | 5.638917  |
| N7           | 12.083261 | 7.548044  | 4.724842  | N14           | 11.378323 | 7.442530  | 3.709024  |
| C8           | 12.341315 | 8.470286  | 6.935294  | N15           | 11.938952 | 7.300963  | 4.895139  |
| C9           | 11.621861 | 8.095735  | 8.076803  | C16           | 11.840537 | 8.479594  | 6.995395  |
| C10          | 12.307215 | 8.110870  | 9.291152  | C17           | 11.012978 | 8.050942  | 8.041158  |
| H11          | 11.777652 | 7.798760  | 10.191302 | C18           | 11.541277 | 8.102873  | 9.332147  |
| C12          | 13.630979 | 8.530400  | 9.389793  | H19           | 10.930653 | 7.741293  | 10.160977 |
| C13          | 14.271446 | 9.004385  | 8.244030  | C20           | 12.808916 | 8.619359  | 9.587991  |
| H14          | 15.285657 | 9.399879  | 8.320319  | C21           | 13.527223 | 9.186448  | 8.533490  |
| C15          | 13.640272 | 8.995470  | 7.006211  | H22           | 14.482945 | 9.671907  | 8.732665  |
| C16          | 10.163291 | 7.778521  | 8.013531  | C23           | 13.051858 | 9.151271  | 7.228350  |
| H17          | 9.792508  | 7.464020  | 8.993638  | C24           | 9.581003  | 7.676482  | 7.828332  |

|              |           |           |           |             |           |           |           |
|--------------|-----------|-----------|-----------|-------------|-----------|-----------|-----------|
| H25          | 9.249504  | 6.949125  | 8.577201  | C21         | 13.638153 | 8.344724  | 8.851500  |
| H26          | 9.401161  | 7.244880  | 6.841906  | H22         | 14.606509 | 8.571634  | 9.299128  |
| H27          | 8.964221  | 8.579758  | 7.923618  | C23         | 13.423969 | 8.639201  | 7.502784  |
| C28          | 13.392150 | 8.579326  | 10.968359 | C24         | 9.731794  | 7.787137  | 7.180442  |
| H29          | 14.015115 | 9.458097  | 11.169235 | H25         | 8.998757  | 7.676301  | 7.985285  |
| H30          | 14.034930 | 7.696567  | 11.091021 | H26         | 9.639556  | 6.916270  | 6.520870  |
| H31          | 12.613501 | 8.526550  | 11.736745 | H27         | 9.478610  | 8.689346  | 6.607993  |
| C32          | 13.762471 | 9.864282  | 6.121365  | C28         | 12.895540 | 7.416040  | 11.068247 |
| H33          | 14.615532 | 10.425811 | 6.514394  | H29         | 13.706896 | 8.010349  | 11.502177 |
| H34          | 13.082085 | 10.570131 | 5.626596  | H30         | 13.191194 | 6.360065  | 11.138181 |
| H35          | 14.146653 | 9.162439  | 5.374052  | H31         | 12.004379 | 7.542450  | 11.692937 |
| C36          | 11.799336 | 6.675398  | 2.567229  | C32         | 14.482102 | 9.362924  | 6.711518  |
| C37          | 11.022566 | 5.594107  | 2.138704  | H33         | 15.400178 | 9.480970  | 7.295592  |
| C38          | 11.460192 | 4.917281  | 1.003045  | H34         | 14.105434 | 10.359464 | 6.447221  |
| H39          | 10.884835 | 4.060599  | 0.649828  | H35         | 14.729136 | 8.840625  | 5.780838  |
| C40          | 12.615455 | 5.292870  | 0.318134  | C36         | 11.254442 | 7.279174  | 2.388450  |
| C41          | 13.345470 | 6.387772  | 0.777871  | C37         | 10.037949 | 6.591961  | 2.336424  |
| H42          | 14.247001 | 6.694526  | 0.246362  | C38         | 9.788995  | 5.823912  | 1.199018  |
| C43          | 12.957466 | 7.103308  | 1.909081  | H39         | 8.848690  | 5.274488  | 1.134204  |
| C44          | 9.806859  | 5.143923  | 2.884458  | C40         | 10.706390 | 5.743555  | 0.153324  |
| H45          | 9.217241  | 4.449073  | 2.278501  | C41         | 11.893033 | 6.470990  | 0.243226  |
| H46          | 9.164415  | 5.982677  | 3.176817  | H42         | 12.616901 | 6.414549  | -0.571181 |
| H47          | 10.092952 | 4.641415  | 3.820116  | C43         | 12.191413 | 7.263085  | 1.347393  |
| C48          | 13.077769 | 4.500608  | -0.867066 | C44         | 9.060408  | 6.630304  | 3.470090  |
| H49          | 13.873875 | 5.014308  | -1.415312 | H45         | 8.064933  | 6.328887  | 3.129988  |
| H50          | 12.255870 | 4.301315  | -1.564211 | H46         | 8.984225  | 7.632253  | 3.910931  |
| H51          | 13.467089 | 3.524959  | -0.545350 | H47         | 9.365846  | 5.945783  | 4.277478  |
| C52          | 13.788748 | 8.234685  | 2.430256  | C48         | 10.446498 | 4.897534  | -1.056818 |
| H53          | 14.466811 | 8.605873  | 1.656076  | H49         | 10.516709 | 5.488690  | -1.977998 |
| H54          | 14.398573 | 7.903935  | 3.286320  | H50         | 9.454708  | 4.433834  | -1.027378 |
| H55          | 13.173703 | 9.073672  | 2.779765  | H51         | 11.196641 | 4.097645  | -1.133869 |
| C56          | 10.521099 | 9.138853  | 4.914699  | C52         | 13.459466 | 8.056372  | 1.402586  |
| C57          | 10.547900 | 8.503554  | 3.637830  | H53         | 14.138553 | 7.743011  | 0.603319  |
| Ru58         | 12.835853 | 5.706862  | 5.881216  | H54         | 13.977147 | 7.927517  | 2.361653  |
| C159         | 10.595249 | 4.970285  | 6.361831  | H55         | 13.263888 | 9.128302  | 1.274712  |
| C160         | 15.032879 | 6.792282  | 5.792895  | C56         | 12.463172 | 4.749196  | 3.601460  |
| O61          | 12.208271 | 2.454690  | 5.714675  | H57         | 11.372176 | 4.757894  | 3.473410  |
| C62          | 13.379584 | 4.779011  | 4.382175  | C58         | 10.507842 | 1.503172  | 2.041319  |
| H63          | 13.886674 | 5.432853  | 3.658692  | H59         | 11.221742 | 0.700070  | 1.795721  |
| C64          | 11.277051 | 1.455706  | 6.183517  | C60         | 9.670988  | 1.092272  | 3.231365  |
| H65          | 11.757598 | 0.467471  | 6.106849  | H61         | 10.303968 | 0.849376  | 4.090516  |
| C66          | 11.004660 | 1.737756  | 7.641524  | H62         | 9.058951  | 0.217616  | 2.985882  |
| H67          | 11.909865 | 1.613655  | 8.244319  | H63         | 9.007674  | 1.914934  | 3.523004  |
| H68          | 10.251002 | 1.033617  | 8.012194  | C64         | 9.659818  | 1.852974  | 0.835233  |
| H69          | 10.631660 | 2.759930  | 7.763813  | H65         | 10.265140 | 2.187873  | -0.014406 |
| C70          | 10.015677 | 1.511300  | 5.344830  | H66         | 8.968169  | 2.663073  | 1.099633  |
| H71          | 10.223295 | 1.348480  | 4.281035  | H67         | 9.070051  | 0.986469  | 0.515631  |
| H72          | 9.552530  | 2.498076  | 5.462514  | C68         | 12.422467 | 2.980032  | 1.905084  |
| H73          | 9.305469  | 0.744787  | 5.674920  | C69         | 12.970387 | 2.346048  | 0.790560  |
| C74          | 12.822966 | 2.274736  | 4.540531  | H70         | 12.436376 | 1.546622  | 0.284959  |
| C75          | 12.918843 | 1.028958  | 3.904343  | C71         | 14.223290 | 2.736070  | 0.326329  |
| H76          | 12.447773 | 0.154377  | 4.339552  | H72         | 14.639424 | 2.234744  | -0.545478 |
| C77          | 13.620912 | 0.884169  | 2.717884  | C73         | 14.950045 | 3.735076  | 0.965700  |
| H78          | 13.682532 | -0.101401 | 2.260487  | H74         | 15.932071 | 4.021135  | 0.598308  |
| C79          | 14.241462 | 1.975250  | 2.115695  | C75         | 14.416121 | 4.358977  | 2.082749  |
| H80          | 14.800386 | 1.859135  | 1.190475  | H76         | 14.956336 | 5.150459  | 2.600778  |
| C81          | 14.130132 | 3.211190  | 2.720796  | C77         | 13.137477 | 4.025529  | 2.552764  |
| H82          | 14.586196 | 4.084159  | 2.254260  | C78         | 11.673020 | 9.811520  | 4.967504  |
| C83          | 13.428298 | 3.409260  | 3.932043  | C79         | 11.393397 | 9.409107  | 3.628035  |
| O84          | 9.967682  | 10.118351 | 5.381962  | C82         | 13.193627 | 2.389141  | 5.711218  |
| H85          | 10.082788 | 8.779668  | 2.703544  | H83         | 12.618875 | 2.156148  | 4.806542  |
| 85           |           |           |           | H84         | 13.846136 | 1.529379  | 5.920760  |
| 5a - P inter |           |           |           | H85         | 12.481331 | 2.499652  | 6.531518  |
| C1           | 14.044236 | 3.604011  | 5.514973  | H86         | 14.693249 | 3.580154  | 4.637522  |
| C2           | 14.400396 | 4.524279  | 6.485706  | O84         | 11.682560 | 10.874687 | 5.565051  |
| H3           | 15.292927 | 5.120811  | 6.291037  | H           | 11.078913 | 9.987204  | 2.772471  |
| C4           | 13.882394 | 4.586937  | 7.887597  | 73          |           |           |           |
| H5           | 13.652110 | 5.623867  | 8.176231  | 5a - TS dis |           |           |           |
| H6           | 12.984078 | 3.985650  | 8.044686  | N1          | 11.692091 | 8.507771  | 5.680170  |
| H7           | 14.672112 | 4.246731  | 8.573124  | N2          | 11.300996 | 7.726978  | 3.743740  |
| Ru9          | 12.902446 | 5.608856  | 5.184197  | N3          | 12.119409 | 7.573413  | 4.787718  |
| C110         | 10.903349 | 4.703751  | 6.239465  | C4          | 12.412798 | 8.781619  | 6.885118  |
| C111         | 14.901806 | 6.760835  | 4.411063  | C5          | 11.835217 | 8.437013  | 8.113514  |
| O12          | 11.250484 | 2.648708  | 2.477254  | C6          | 12.582170 | 8.689464  | 9.262342  |
| N13          | 11.954034 | 8.547887  | 5.562279  | H7          | 12.160504 | 8.415410  | 10.229959 |
| N14          | 11.528748 | 8.071195  | 3.556154  | C8          | 13.830563 | 9.304329  | 9.209502  |
| N15          | 11.849318 | 7.510764  | 4.706331  | C9          | 14.313663 | 9.732005  | 7.974035  |
| C16          | 12.190560 | 8.316933  | 6.953770  | H10         | 15.261045 | 10.269886 | 7.925457  |
| C17          | 11.113949 | 7.887430  | 7.744058  | C11         | 13.615006 | 9.495953  | 6.795937  |
| C18          | 11.366478 | 7.608421  | 9.083182  | C12         | 10.434705 | 7.919669  | 8.208559  |
| H19          | 10.549601 | 7.248371  | 9.709216  | H13         | 10.193927 | 7.642268  | 9.239408  |
| C20          | 12.629682 | 7.796450  | 9.642731  | H14         | 10.272727 | 7.045193  | 7.569714  |

|      |           |           |           |     |           |           |           |
|------|-----------|-----------|-----------|-----|-----------|-----------|-----------|
| H15  | 9.735295  | 8.702814  | 7.887539  | H22 | 14.432454 | 6.943296  | 10.860140 |
| C16  | 14.633695 | 9.518767  | 10.456847 | H23 | 13.349450 | 8.161537  | 11.534264 |
| H17  | 15.208196 | 10.450747 | 10.410243 | C24 | 14.489632 | 9.620582  | 6.007055  |
| H18  | 15.353114 | 8.702456  | 10.601380 | H25 | 15.561763 | 9.621356  | 6.226528  |
| H19  | 13.995978 | 9.553386  | 11.346727 | H26 | 14.140962 | 10.661816 | 5.974615  |
| C20  | 14.121276 | 10.020553 | 5.488551  | H27 | 14.357432 | 9.187610  | 5.010820  |
| H21  | 14.879876 | 10.792064 | 5.654772  | C28 | 11.273258 | 7.275423  | 2.348171  |
| H22  | 13.310942 | 10.464626 | 4.895276  | C29 | 10.142813 | 6.469223  | 2.201281  |
| H23  | 14.582188 | 9.217815  | 4.900313  | C30 | 10.036681 | 5.747339  | 1.013917  |
| C24  | 11.495158 | 6.980264  | 2.532438  | H31 | 9.162817  | 5.112984  | 0.864348  |
| C25  | 10.614647 | 5.941268  | 2.215708  | C32 | 11.019623 | 5.810906  | 0.026659  |
| C26  | 10.847292 | 5.256795  | 1.023486  | C33 | 12.131885 | 6.629209  | 0.229952  |
| H27  | 10.180864 | 4.436260  | 0.755230  | H34 | 12.906857 | 6.679325  | -0.535507 |
| C28  | 11.903213 | 5.583836  | 0.174992  | C35 | 12.283730 | 7.386107  | 1.388320  |
| C29  | 12.736722 | 6.647498  | 0.522636  | C36 | 9.135310  | 6.329376  | 3.300486  |
| H30  | 13.556611 | 6.925629  | -0.140281 | H37 | 8.250856  | 5.788400  | 2.951004  |
| C31  | 12.553652 | 7.366019  | 1.701584  | H38 | 8.811779  | 7.303627  | 3.687430  |
| C32  | 9.499937  | 5.525952  | 3.121811  | H39 | 9.560435  | 5.773999  | 4.151331  |
| H33  | 8.729536  | 4.984984  | 2.562632  | C40 | 10.886129 | 5.033275  | -1.248326 |
| H34  | 9.029979  | 6.372447  | 3.634018  | H41 | 10.570685 | 5.681877  | -2.075485 |
| H35  | 9.885875  | 4.869984  | 3.913969  | H42 | 10.143632 | 4.231845  | -1.161043 |
| C36  | 12.149978 | 4.794896  | -1.075845 | H43 | 11.842467 | 4.584174  | -1.540967 |
| H37  | 12.703802 | 5.378372  | -1.818649 | C44 | 13.490476 | 8.241173  | 1.619596  |
| H38  | 11.212081 | 4.460511  | -1.532278 | H45 | 14.087174 | 8.326260  | 0.706897  |
| H39  | 12.742079 | 3.896383  | -0.859479 | H46 | 14.128363 | 7.810961  | 2.406451  |
| C40  | 13.489696 | 8.471462  | 2.083499  | H47 | 13.216094 | 9.251971  | 1.945838  |
| H41  | 14.078240 | 8.796928  | 1.220506  | C48 | 12.672100 | 4.754714  | 3.629622  |
| H42  | 14.187309 | 8.138720  | 2.865087  | H49 | 12.013461 | 4.970151  | 2.785978  |
| H43  | 12.957820 | 9.343857  | 2.484267  | C50 | 10.917571 | 1.552516  | 1.629768  |
| C44  | 10.635378 | 9.300138  | 5.187107  | H51 | 10.861040 | 0.703046  | 2.328789  |
| C45  | 10.427303 | 8.737478  | 3.887068  | C52 | 9.523201  | 2.078119  | 1.378056  |
| O46  | 10.117230 | 10.243005 | 5.765281  | H53 | 9.073396  | 2.448983  | 2.305098  |
| Ru47 | 13.052735 | 5.814117  | 5.382337  | H54 | 8.886091  | 1.288356  | 0.965695  |
| C148 | 11.004123 | 5.043837  | 6.256064  | H55 | 9.560483  | 2.903614  | 0.656726  |
| C149 | 15.192840 | 6.761273  | 5.761894  | C56 | 11.615833 | 1.151991  | 0.345300  |
| O50  | 11.915887 | 2.628346  | 4.532771  | H57 | 12.639339 | 0.804170  | 0.519076  |
| C51  | 13.441090 | 4.939197  | 3.855256  | H58 | 11.663133 | 2.017926  | -0.326704 |
| H52  | 13.417213 | 5.325736  | 2.830596  | H59 | 11.062716 | 0.352793  | -0.160738 |
| C53  | 11.068811 | 1.540501  | 4.931150  | C60 | 12.701916 | 2.342459  | 3.040856  |
| H54  | 11.302384 | 1.279729  | 5.976066  | C61 | 13.241628 | 1.068893  | 3.221229  |
| C55  | 9.650600  | 2.056874  | 4.854772  | H62 | 12.830256 | 0.210719  | 2.699228  |
| H56  | 9.517075  | 2.924885  | 5.506682  | C63 | 14.318599 | 0.883342  | 4.081932  |
| H57  | 8.948394  | 1.270347  | 5.152371  | H64 | 14.723170 | -0.118817 | 4.207036  |
| H58  | 9.418194  | 2.351876  | 3.823242  | C65 | 14.889173 | 1.952030  | 4.764542  |
| C59  | 11.271028 | 0.352357  | 4.007069  | H66 | 15.744572 | 1.799354  | 5.416295  |
| H60  | 12.301287 | -0.016268 | 4.006371  | C67 | 14.371543 | 3.222078  | 4.577278  |
| H61  | 11.014393 | 0.643865  | 2.981332  | H68 | 14.860616 | 4.079010  | 5.045682  |
| H62  | 10.613050 | -0.473094 | 4.301492  | C69 | 13.267999 | 3.447647  | 3.731300  |
| C63  | 13.235308 | 2.584380  | 4.779500  | C70 | 11.196456 | 9.735269  | 5.023744  |
| C64  | 13.884064 | 1.530651  | 5.435218  | C71 | 10.911709 | 9.305392  | 3.697397  |
| H65  | 13.309296 | 0.728452  | 5.886940  | H   | 10.412437 | 9.805332  | 2.881478  |
| C66  | 15.268968 | 1.491412  | 5.498241  | O73 | 10.997748 | 10.749128 | 5.669041  |
| H67  | 15.748038 | 0.659732  | 6.010698  | 76  |           |           |           |
| C68  | 16.045580 | 2.487855  | 4.911069  | 5b  | -         | s         |           |
| H69  | 17.130047 | 2.447966  | 4.961431  | Ru1 | 12.918249 | 5.741427  | 5.208743  |
| C70  | 15.411866 | 3.561246  | 4.313628  | C12 | 10.869642 | 4.945838  | 6.177741  |
| H71  | 15.993161 | 4.398895  | 3.931638  | C13 | 15.148411 | 6.570664  | 4.914146  |
| C72  | 14.008168 | 3.640506  | 4.230782  | O4  | 13.858775 | 3.880938  | 5.917702  |
| H73  | 9.775399  | 9.112056  | 3.111754  | N5  | 11.925399 | 8.577094  | 5.506860  |
| 73   |           |           |           | N6  | 11.543139 | 8.052161  | 3.502522  |
| 5a   | -         | P         | dis       | N7  | 12.052311 | 7.562610  | 4.620380  |
| Ru1  | 12.920171 | 5.832213  | 5.089950  | C8  | 12.414983 | 8.440252  | 6.839850  |
| C12  | 11.138636 | 4.939041  | 6.376365  | C9  | 11.537293 | 8.003282  | 7.839920  |
| C13  | 15.100028 | 6.657595  | 4.594943  | C10 | 12.064434 | 7.822649  | 9.117078  |
| O4   | 11.633055 | 2.617427  | 2.268321  | H11 | 11.408226 | 7.465061  | 9.911223  |
| N5   | 11.858743 | 8.578831  | 5.537104  | C12 | 13.397308 | 8.115688  | 9.406042  |
| N6   | 11.391285 | 8.051089  | 3.547240  | C13 | 14.200964 | 8.663526  | 8.406278  |
| N7   | 11.966213 | 7.580318  | 4.634301  | H14 | 15.223099 | 8.961710  | 8.641728  |
| C8   | 12.411944 | 8.452029  | 6.847412  | C15 | 13.722805 | 8.863029  | 7.114821  |
| C9   | 11.576506 | 8.022268  | 7.887794  | C16 | 10.072135 | 7.858422  | 7.572204  |
| C10  | 12.148970 | 7.874964  | 9.146040  | H17 | 9.579206  | 7.303804  | 8.376809  |
| H11  | 11.526313 | 7.524809  | 9.969789  | H18 | 9.871187  | 7.332114  | 6.633969  |
| C12  | 13.488145 | 8.186635  | 9.382635  | H19 | 9.620075  | 8.857266  | 7.508652  |
| C13  | 14.252085 | 8.712722  | 8.342447  | C20 | 13.958530 | 7.856857  | 10.771900 |
| H14  | 15.278874 | 9.024928  | 8.534835  | H21 | 14.716955 | 8.599575  | 11.043019 |
| C15  | 13.726780 | 8.883570  | 7.063565  | H22 | 14.443023 | 6.872160  | 10.813536 |
| C16  | 10.106791 | 7.837933  | 7.676054  | H23 | 13.177422 | 7.867398  | 11.539512 |
| H17  | 9.653457  | 7.316705  | 8.524792  | C24 | 14.524712 | 9.604179  | 6.092014  |
| H18  | 9.888438  | 7.256795  | 6.774907  | H25 | 15.577463 | 9.660652  | 6.385448  |
| H19  | 9.627669  | 8.821008  | 7.575022  | H26 | 14.132234 | 10.625817 | 5.999726  |
| C20  | 14.083817 | 7.977018  | 10.742199 | H27 | 14.480932 | 9.129442  | 5.106879  |
| H21  | 14.943809 | 8.633342  | 10.912282 | C28 | 11.473787 | 7.271344  | 2.304097  |

|              |           |           |           |               |           |           |           |
|--------------|-----------|-----------|-----------|---------------|-----------|-----------|-----------|
| C29          | 10.322370 | 6.509491  | 2.083592  | C33           | 12.902465 | 7.013400  | 0.364448  |
| C30          | 10.267569 | 5.779214  | 0.899244  | H34           | 13.786579 | 7.245457  | -0.230636 |
| H31          | 9.387373  | 5.167890  | 0.697610  | C35           | 12.756781 | 7.612247  | 1.612850  |
| C32          | 11.310666 | 5.806187  | -0.028338 | C36           | 9.430352  | 6.064307  | 2.721787  |
| C33          | 12.439062 | 6.579830  | 0.243950  | H37           | 8.849749  | 5.266840  | 2.248456  |
| H34          | 13.262343 | 6.597876  | -0.470715 | H38           | 8.771311  | 6.935691  | 2.829465  |
| C35          | 12.547741 | 7.331463  | 1.413101  | H39           | 9.700319  | 5.740803  | 3.737420  |
| C36          | 9.231534  | 6.437763  | 3.106974  | C40           | 12.146724 | 5.456634  | -1.463383 |
| H37          | 8.346658  | 5.939826  | 2.699798  | H41           | 13.158278 | 5.613385  | -1.852584 |
| H38          | 8.933894  | 7.433339  | 3.460113  | H42           | 11.439109 | 5.852242  | -2.202720 |
| H39          | 9.565180  | 5.876028  | 3.993538  | H43           | 11.971124 | 4.375246  | -1.400765 |
| C40          | 11.204045 | 5.029786  | -1.306986 | C44           | 13.790424 | 8.561829  | 2.136229  |
| H41          | 12.188970 | 4.831000  | -1.741932 | H45           | 14.450812 | 8.897359  | 1.330644  |
| H42          | 10.621800 | 5.583235  | -2.054855 | H46           | 14.412880 | 8.078176  | 2.902003  |
| H43          | 10.697390 | 4.070609  | -1.152340 | H47           | 13.338833 | 9.447380  | 2.602149  |
| C44          | 13.781356 | 8.117517  | 1.733161  | C48           | 12.812078 | 4.739078  | 3.796981  |
| H45          | 14.436488 | 8.187523  | 0.859791  | H49           | 11.919882 | 4.139697  | 3.563157  |
| H46          | 14.346368 | 7.642021  | 2.550365  | C50           | 16.409085 | 6.019478  | 5.106810  |
| H47          | 13.543600 | 9.135626  | 2.066809  | H51           | 17.073144 | 6.639656  | 4.484139  |
| C48          | 12.854648 | 4.743539  | 3.674626  | C52           | 16.207870 | 6.697940  | 6.435646  |
| H49          | 12.415733 | 5.079072  | 2.729645  | H53           | 15.840664 | 7.718909  | 6.314132  |
| C50          | 14.202984 | 3.539518  | 7.294688  | H54           | 17.169845 | 6.742108  | 6.959067  |
| H51          | 15.179638 | 3.035293  | 7.241891  | H55           | 15.502646 | 6.131516  | 7.055798  |
| C52          | 14.355080 | 4.839612  | 8.046860  | C56           | 16.955887 | 4.616111  | 5.259276  |
| H53          | 15.073002 | 5.503621  | 7.553105  | H57           | 17.139798 | 4.125445  | 4.298747  |
| H54          | 14.713123 | 4.620290  | 9.059847  | H58           | 16.247712 | 4.011479  | 5.837335  |
| H55          | 13.389922 | 5.359133  | 8.138158  | H59           | 17.906903 | 4.660678  | 5.801730  |
| C56          | 13.136385 | 2.637188  | 7.875327  | C60           | 15.088818 | 5.406180  | 3.182345  |
| H57          | 13.025149 | 1.706417  | 7.308999  | C61           | 16.136208 | 5.476422  | 2.270705  |
| H58          | 12.173418 | 3.160587  | 7.866596  | H62           | 17.045207 | 6.022468  | 2.506652  |
| H59          | 13.396278 | 2.379808  | 8.908571  | C63           | 16.022965 | 4.813228  | 1.051407  |
| C60          | 13.964791 | 2.969245  | 4.916773  | H64           | 16.850572 | 4.861445  | 0.347037  |
| C61          | 14.546580 | 1.713643  | 5.019097  | C65           | 14.880043 | 4.084698  | 0.731516  |
| H62          | 14.961460 | 1.353269  | 5.955309  | H66           | 14.813774 | 3.556383  | -0.216601 |
| C63          | 14.591560 | 0.910640  | 3.881338  | C67           | 13.825891 | 4.046155  | 1.630551  |
| H64          | 15.048186 | -0.073831 | 3.954595  | H68           | 12.911297 | 3.501845  | 1.397097  |
| C65          | 14.066284 | 1.337867  | 2.663306  | C69           | 13.906928 | 4.715130  | 2.859559  |
| H66          | 14.113011 | 0.689438  | 1.792622  | C70           | 10.809507 | 9.434635  | 5.156748  |
| C67          | 13.485746 | 2.593058  | 2.574138  | C71           | 10.674560 | 9.030430  | 3.792409  |
| H68          | 13.067928 | 2.957596  | 1.635858  | O72           | 10.362675 | 10.377925 | 5.792907  |
| C69          | 13.427980 | 3.426674  | 3.697842  | C73           | 9.944083  | 9.740023  | 2.721412  |
| C70          | 11.332689 | 9.737457  | 4.958414  | H74           | 9.529541  | 10.653338 | 3.159451  |
| C71          | 11.095928 | 9.322857  | 3.614482  | H75           | 10.598147 | 10.018266 | 1.884663  |
| O72          | 11.123938 | 10.778339 | 5.566126  | H76           | 9.114211  | 9.152142  | 2.308006  |
| C73          | 10.485634 | 10.106016 | 2.519090  | 88            |           |           |           |
| H74          | 10.237992 | 11.092256 | 2.923865  | 5b - TS inter |           |           |           |
| H75          | 11.164545 | 10.242978 | 1.667149  | C1            | 14.512635 | 4.122331  | 7.783169  |
| H76          | 9.564137  | 9.649570  | 2.134302  | C2            | 13.661668 | 4.885144  | 8.509347  |
| 76           |           |           |           | H3            | 13.818298 | 5.970825  | 8.459134  |
| 5b - S - cis |           |           |           | C4            | 12.579647 | 4.436903  | 9.430517  |
| Ru1          | 12.919125 | 5.663461  | 5.360467  | H5            | 12.723954 | 4.872821  | 10.427988 |
| C12          | 10.749710 | 5.016903  | 5.963629  | H6            | 11.603502 | 4.784820  | 9.062678  |
| C13          | 13.795940 | 4.056982  | 6.825485  | H7            | 12.530756 | 3.348383  | 9.535634  |
| O4           | 15.109599 | 5.998844  | 4.417752  | C8            | 14.620264 | 2.635028  | 7.785321  |
| N5           | 11.688212 | 8.448356  | 5.655955  | H9            | 13.869831 | 2.151465  | 8.417688  |
| N6           | 11.433660 | 7.929045  | 3.623048  | H10           | 14.520439 | 2.228092  | 6.771137  |
| N7           | 12.085276 | 7.555232  | 4.719495  | H11           | 15.611996 | 2.336391  | 8.150165  |
| C8           | 12.328092 | 8.482557  | 6.932509  | H12           | 15.272519 | 4.655470  | 7.208586  |
| C9           | 11.612415 | 8.116964  | 8.078686  | N13           | 11.401490 | 8.256773  | 5.666580  |
| C10          | 12.297809 | 8.152747  | 9.292630  | N14           | 11.341582 | 7.373297  | 3.739138  |
| H11          | 11.770372 | 7.849614  | 10.197205 | N15           | 11.966628 | 7.281495  | 4.908881  |
| C12          | 13.619137 | 8.581660  | 9.385035  | C16           | 11.864080 | 8.480569  | 7.002346  |
| C13          | 14.256938 | 9.042159  | 8.232285  | C17           | 11.086207 | 8.054815  | 8.087971  |
| H14          | 15.269059 | 9.444143  | 8.302602  | C18           | 11.658225 | 8.152217  | 9.357214  |
| C15          | 13.624419 | 9.014421  | 6.995376  | H19           | 11.087012 | 7.794883  | 10.215540 |
| C16          | 10.156530 | 7.786815  | 8.018578  | C20           | 12.919347 | 8.709266  | 9.556144  |
| H17          | 9.787398  | 7.480981  | 9.002070  | C21           | 13.582796 | 9.269682  | 8.464220  |
| H18          | 9.957759  | 6.977628  | 7.306917  | H22           | 14.532413 | 9.783014  | 8.616661  |
| H19          | 9.594498  | 8.672112  | 7.692973  | C23           | 13.064163 | 9.187631  | 7.177426  |
| C20          | 14.344397 | 8.563485  | 10.696570 | C24           | 9.658152  | 7.637457  | 7.935803  |
| H21          | 15.046799 | 9.400627  | 10.779313 | H25           | 9.361146  | 6.951726  | 8.736958  |
| H22          | 14.926123 | 7.639125  | 10.806145 | H26           | 9.465169  | 7.142259  | 6.982309  |
| H23          | 13.650632 | 8.612950  | 11.542255 | H27           | 9.022904  | 8.531009  | 7.990096  |
| C24          | 14.271931 | 9.591975  | 5.772278  | C28           | 13.549314 | 8.713355  | 10.916387 |
| H25          | 15.230697 | 10.058950 | 6.021903  | H29           | 14.219730 | 9.569578  | 11.049001 |
| H26          | 13.630263 | 10.360960 | 5.320394  | H30           | 14.151645 | 7.806475  | 11.065314 |
| H27          | 14.453321 | 8.829666  | 5.002513  | H31           | 12.797012 | 8.738567  | 11.712311 |
| C28          | 11.627667 | 7.270185  | 2.362957  | C32           | 13.728099 | 9.879252  | 6.028562  |
| C29          | 10.641722 | 6.388288  | 1.904230  | H33           | 14.537463 | 10.522746 | 6.387009  |
| C30          | 10.843331 | 5.814542  | 0.651134  | H34           | 13.005723 | 10.503833 | 5.486328  |
| H31          | 10.100652 | 5.110680  | 0.272724  | H35           | 14.164083 | 9.156777  | 5.330385  |
| C32          | 11.962922 | 6.110530  | -0.126885 | C36           | 11.784383 | 6.625460  | 2.593987  |

|              |           |           |           |             |           |           |           |
|--------------|-----------|-----------|-----------|-------------|-----------|-----------|-----------|
| C37          | 11.048916 | 5.516518  | 2.162995  | H30         | 13.462363 | 6.494370  | 11.120279 |
| C38          | 11.507073 | 4.859761  | 1.023684  | H31         | 12.280681 | 7.670491  | 11.698809 |
| H39          | 10.964719 | 3.980937  | 0.672074  | C32         | 14.496854 | 9.467688  | 6.592066  |
| C40          | 12.644956 | 5.279602  | 0.335114  | H33         | 15.450277 | 9.588026  | 7.116003  |
| C41          | 13.333747 | 6.400671  | 0.795203  | H34         | 14.091801 | 10.463617 | 6.368662  |
| H42          | 14.221675 | 6.742770  | 0.262128  | H35         | 14.688230 | 8.960789  | 5.640374  |
| C43          | 12.921997 | 7.097418  | 1.930112  | C36         | 11.219256 | 7.223661  | 2.422312  |
| C44          | 9.857386  | 5.011674  | 2.912179  | C37         | 9.997986  | 6.546052  | 2.377230  |
| H45          | 9.291682  | 4.298372  | 2.304492  | C38         | 9.761430  | 5.733373  | 1.267711  |
| H46          | 9.182708  | 5.818087  | 3.222844  | H39         | 8.817875  | 5.189100  | 1.209174  |
| H47          | 10.171969 | 4.514586  | 3.841094  | C40         | 10.697274 | 5.599584  | 0.244252  |
| C48          | 13.133113 | 4.506691  | -0.852499 | C41         | 11.891447 | 6.316576  | 0.326468  |
| H49          | 13.919569 | 5.043095  | -1.393047 | H42         | 12.632637 | 6.212779  | -0.467565 |
| H50          | 12.320285 | 4.291635  | -1.555778 | C43         | 12.176991 | 7.150696  | 1.402360  |
| H51          | 13.544041 | 3.538822  | -0.533794 | C44         | 9.011027  | 6.627163  | 3.500530  |
| C52          | 13.710580 | 8.261266  | 2.447238  | H45         | 8.013553  | 6.330282  | 3.162212  |
| H53          | 14.368614 | 8.660060  | 1.669231  | H46         | 8.946101  | 7.638797  | 3.921176  |
| H54          | 14.337648 | 7.954651  | 3.299680  | H47         | 9.307158  | 5.956349  | 4.322827  |
| H55          | 13.066476 | 9.075675  | 2.803823  | C48         | 10.446071 | 4.714110  | -0.939120 |
| C56          | 10.436322 | 9.012622  | 4.971133  | H49         | 10.411796 | 5.295022  | -1.869177 |
| C57          | 10.446589 | 8.378752  | 3.686983  | H50         | 9.500568  | 4.168881  | -0.849320 |
| Ru58         | 12.858932 | 5.683527  | 5.894842  | H51         | 11.256166 | 3.980524  | -1.051105 |
| C159         | 10.618983 | 4.937706  | 6.360431  | C52         | 13.459130 | 7.920469  | 1.463773  |
| C160         | 15.043612 | 6.794931  | 5.840829  | H53         | 14.134604 | 7.601508  | 0.663686  |
| O61          | 12.239531 | 2.434037  | 5.659522  | H54         | 13.973101 | 7.775044  | 2.423406  |
| C62          | 13.429282 | 4.781811  | 4.390936  | H55         | 13.287120 | 8.998373  | 1.344543  |
| H63          | 13.943763 | 5.450057  | 3.685243  | C56         | 12.561494 | 4.726914  | 3.619334  |
| C64          | 11.304324 | 1.428385  | 6.103344  | H57         | 11.479092 | 4.762221  | 3.427363  |
| H65          | 11.779579 | 0.440039  | 6.002343  | C58         | 10.714738 | 1.352734  | 2.206426  |
| C66          | 11.035632 | 1.677591  | 7.568239  | H59         | 11.431178 | 0.540861  | 1.999985  |
| H67          | 11.938801 | 1.521356  | 8.166793  | C60         | 9.847130  | 0.975948  | 3.385527  |
| H68          | 10.269046 | 0.978715  | 7.921500  | H61         | 10.457443 | 0.755169  | 4.266803  |
| H69          | 10.680697 | 2.703014  | 7.715250  | H62         | 9.239723  | 0.095900  | 3.147729  |
| C70          | 10.043531 | 1.509167  | 5.265996  | H63         | 9.178716  | 1.807270  | 3.637930  |
| H71          | 10.253492 | 1.380616  | 4.197736  | C64         | 9.897407  | 1.672550  | 0.971291  |
| H72          | 9.578640  | 2.490989  | 5.414562  | H65         | 10.524700 | 1.982070  | 0.128010  |
| H73          | 9.333885  | 0.731549  | 5.570316  | H66         | 9.203687  | 2.492238  | 1.198336  |
| C74          | 12.868846 | 2.275122  | 4.489560  | H67         | 9.311598  | 0.800033  | 0.660778  |
| C75          | 12.962626 | 1.044317  | 3.825321  | C68         | 12.612338 | 2.848335  | 2.041503  |
| H76          | 12.475564 | 0.164398  | 4.231097  | C69         | 13.196008 | 2.170576  | 0.972517  |
| C77          | 13.684245 | 0.920879  | 2.648011  | H70         | 12.698919 | 1.321726  | 0.511993  |
| H78          | 13.744708 | -0.054086 | 2.168447  | C71         | 14.438988 | 2.579333  | 0.497909  |
| C79          | 14.325618 | 2.019811  | 2.083714  | H72         | 14.884012 | 2.042797  | -0.337669 |
| H80          | 14.901833 | 1.920255  | 1.167168  | C73         | 15.120261 | 3.640543  | 1.083741  |
| C81          | 14.211622 | 3.243155  | 2.714182  | H74         | 16.096216 | 3.940020  | 0.711019  |
| H82          | 14.681532 | 4.122983  | 2.275091  | C75         | 14.549412 | 4.310360  | 2.156039  |
| C83          | 13.489303 | 3.419552  | 3.916087  | H76         | 15.055172 | 5.147408  | 2.636111  |
| O84          | 9.827698  | 9.973324  | 5.417536  | C77         | 13.277453 | 3.958451  | 2.627658  |
| C85          | 9.729126  | 8.814716  | 2.471010  | C78         | 11.620378 | 9.783719  | 4.965190  |
| H86          | 9.127737  | 9.688218  | 2.741226  | C79         | 11.308615 | 9.377094  | 3.631173  |
| H87          | 10.417798 | 9.101453  | 1.664829  | C82         | 13.225834 | 2.382096  | 5.796871  |
| H88          | 9.059449  | 8.042281  | 2.072126  | H83         | 12.678970 | 2.132382  | 4.879808  |
| 88           |           |           |           | H84         | 13.880501 | 1.531780  | 6.036482  |
| 5b - P inter |           |           |           | H85         | 12.489248 | 2.495421  | 6.595140  |
| C1           | 14.070807 | 3.602848  | 5.610797  | H86         | 14.754352 | 3.570445  | 4.760068  |
| C2           | 14.385649 | 4.539030  | 6.581779  | O84         | 11.596916 | 10.867059 | 5.533195  |
| H3           | 15.282716 | 5.136853  | 6.415226  | C86         | 10.772990 | 10.219353 | 2.541359  |
| C4           | 13.811741 | 4.619618  | 7.960685  | H87         | 10.630051 | 11.225802 | 2.947086  |
| H5           | 13.545213 | 5.655870  | 8.219643  | H88         | 11.451532 | 10.291401 | 1.681258  |
| H6           | 12.922390 | 4.000168  | 8.096645  | H89         | 9.807461  | 9.851347  | 2.170183  |
| H7           | 14.582298 | 4.313713  | 8.683163  | 76          |           |           |           |
| Ru9          | 12.932608 | 5.591033  | 5.212944  | 5b - TS dis |           |           |           |
| C110         | 10.898814 | 4.681826  | 6.198304  | N1          | 11.692091 | 8.507771  | 5.680170  |
| C111         | 14.962609 | 6.731349  | 4.500133  | N2          | 11.300996 | 7.726978  | 3.743740  |
| O12          | 11.449067 | 2.507956  | 2.628825  | N3          | 12.119409 | 7.573413  | 4.787718  |
| N13          | 11.964036 | 8.549490  | 5.559389  | C4          | 12.412798 | 8.781619  | 6.885118  |
| N14          | 11.491648 | 8.043347  | 3.568874  | C5          | 11.835217 | 8.437013  | 8.113514  |
| N15          | 11.866773 | 7.496868  | 4.716857  | C6          | 12.582170 | 8.689464  | 9.262342  |
| C16          | 12.258677 | 8.346468  | 6.942526  | H7          | 12.160504 | 8.415410  | 10.229959 |
| C17          | 11.225921 | 7.900678  | 7.780584  | C8          | 13.830563 | 9.304329  | 9.209502  |
| C18          | 11.538591 | 7.653772  | 9.113659  | C9          | 14.313663 | 9.732005  | 7.974035  |
| H19          | 10.757311 | 7.283791  | 9.778408  | H10         | 15.261045 | 10.269886 | 7.925457  |
| C20          | 12.816815 | 7.890269  | 9.619764  | C11         | 13.615006 | 9.495953  | 6.795937  |
| C21          | 13.776689 | 8.454570  | 8.780894  | C12         | 10.434705 | 7.919669  | 8.208559  |
| H22          | 14.754317 | 8.718166  | 9.186076  | H13         | 10.193927 | 7.642268  | 9.239408  |
| C23          | 13.516091 | 8.719383  | 7.437069  | H14         | 10.272727 | 7.045193  | 7.569714  |
| C24          | 9.825617  | 7.761722  | 7.272217  | H15         | 9.735295  | 8.702814  | 7.887539  |
| H25          | 9.129449  | 7.617639  | 8.104179  | C16         | 14.633695 | 9.518767  | 10.456847 |
| H26          | 9.732074  | 6.898832  | 6.602415  | H17         | 15.208196 | 10.450747 | 10.410243 |
| H27          | 9.523448  | 8.664224  | 6.724541  | H18         | 15.353114 | 8.702456  | 10.601380 |
| C28          | 13.147447 | 7.544165  | 11.040515 | H19         | 13.995978 | 9.553386  | 11.346727 |
| H29          | 13.966192 | 8.159836  | 11.428077 | C20         | 14.121276 | 10.020553 | 5.488551  |

|      |           |           |           |     |           |           |           |
|------|-----------|-----------|-----------|-----|-----------|-----------|-----------|
| H21  | 14.879876 | 10.792064 | 5.654772  | H25 | 15.675212 | 9.693982  | 7.057777  |
| H22  | 13.310942 | 10.464626 | 4.895276  | H26 | 14.348625 | 10.488003 | 6.180836  |
| H23  | 14.582188 | 9.217815  | 4.900313  | H27 | 14.995012 | 8.942827  | 5.601012  |
| C24  | 11.495158 | 6.980264  | 2.532438  | C28 | 11.261966 | 7.283101  | 2.374982  |
| C25  | 10.614647 | 5.941268  | 2.215708  | C29 | 10.043262 | 6.603325  | 2.449280  |
| C26  | 10.847292 | 5.256795  | 1.023486  | C30 | 9.682293  | 5.823056  | 1.351929  |
| H27  | 10.180864 | 4.436260  | 0.755230  | H31 | 8.735795  | 5.281931  | 1.382401  |
| C28  | 11.903213 | 5.583836  | 0.174992  | C32 | 10.498240 | 5.721929  | 0.227078  |
| C29  | 12.736722 | 6.647498  | 0.522636  | C33 | 11.699695 | 6.431086  | 0.198791  |
| H30  | 13.556611 | 6.925629  | -0.140281 | H34 | 12.342685 | 6.357805  | -0.678857 |
| C31  | 12.553652 | 7.366019  | 1.701584  | C35 | 12.111227 | 7.226722  | 1.264057  |
| C32  | 9.499937  | 5.525952  | 3.121811  | C36 | 9.182371  | 6.662664  | 3.672803  |
| H33  | 8.729536  | 4.984984  | 2.562632  | H37 | 8.170155  | 6.310683  | 3.452423  |
| H34  | 9.029979  | 6.372447  | 3.634018  | H38 | 9.111455  | 7.680127  | 4.078768  |
| H35  | 9.885875  | 4.869984  | 3.913969  | H39 | 9.598465  | 6.027626  | 4.469092  |
| C36  | 12.149978 | 4.794896  | -1.075845 | C40 | 10.112368 | 4.855450  | -0.932899 |
| H37  | 12.703802 | 5.378372  | -1.818649 | H41 | 10.299245 | 5.355959  | -1.889714 |
| H38  | 11.212081 | 4.460511  | -1.532278 | H42 | 9.054789  | 4.572734  | -0.896960 |
| H39  | 12.742079 | 3.896383  | -0.859479 | H43 | 10.705550 | 3.930544  | -0.936166 |
| C40  | 13.489696 | 8.471462  | 2.083499  | C44 | 13.418651 | 7.954257  | 1.230542  |
| H41  | 14.078240 | 8.796928  | 1.220506  | H45 | 13.961682 | 7.726497  | 0.308681  |
| H42  | 14.187309 | 8.138720  | 2.865087  | H46 | 14.051569 | 7.670173  | 2.082876  |
| H43  | 12.957820 | 9.343857  | 2.484267  | H47 | 13.284136 | 9.041969  | 1.280485  |
| C44  | 10.635378 | 9.300138  | 5.187107  | C48 | 12.704706 | 4.744014  | 3.549233  |
| C45  | 10.427303 | 8.737478  | 3.887068  | H49 | 11.929284 | 4.926968  | 2.802429  |
| O46  | 10.117230 | 10.243005 | 5.765281  | C50 | 10.929574 | 1.459278  | 1.694943  |
| Ru47 | 13.052735 | 5.814117  | 5.382337  | H51 | 10.956278 | 0.629258  | 2.419089  |
| C148 | 11.004123 | 5.043837  | 6.256064  | C52 | 9.505768  | 1.946660  | 1.551255  |
| C149 | 15.192840 | 6.761273  | 5.761894  | H53 | 9.110776  | 2.282034  | 2.515366  |
| O50  | 11.915887 | 2.628346  | 4.532771  | H54 | 8.865109  | 1.146348  | 1.165204  |
| C51  | 13.441090 | 4.939197  | 3.855256  | H55 | 9.467850  | 2.789647  | 0.849813  |
| H52  | 13.417213 | 5.325736  | 2.830596  | C56 | 11.525244 | 1.028809  | 0.368638  |
| C53  | 11.068811 | 1.540501  | 4.931150  | H57 | 12.574494 | 0.730525  | 0.460850  |
| H54  | 11.302384 | 1.279729  | 5.976066  | H58 | 11.474491 | 1.858307  | -0.347308 |
| C55  | 9.650600  | 2.056874  | 4.854772  | H59 | 10.963463 | 0.184778  | -0.046814 |
| H56  | 9.517075  | 2.924885  | 5.506682  | C60 | 12.807121 | 2.337657  | 2.924527  |
| H57  | 8.948394  | 1.270347  | 5.152371  | C61 | 13.417467 | 1.090610  | 3.059366  |
| H58  | 9.418194  | 2.351876  | 3.823242  | H62 | 12.993601 | 0.209840  | 2.587211  |
| C59  | 11.271028 | 0.352357  | 4.007069  | C63 | 14.583385 | 0.960390  | 3.807555  |
| H60  | 12.301287 | -0.016268 | 4.006371  | H64 | 15.042532 | -0.021940 | 3.896730  |
| H61  | 11.014393 | 0.643865  | 2.981332  | C65 | 15.173031 | 2.060611  | 4.419849  |
| H62  | 10.613050 | -0.473094 | 4.301492  | H66 | 16.097767 | 1.953569  | 4.979525  |
| C63  | 13.235308 | 2.584380  | 4.779500  | C67 | 14.578528 | 3.303563  | 4.283518  |
| C64  | 13.884064 | 1.530651  | 5.435218  | H68 | 15.068453 | 4.185906  | 4.701420  |
| H65  | 13.309296 | 0.728452  | 5.886940  | C69 | 13.382914 | 3.471728  | 3.557687  |
| C66  | 15.268968 | 1.491412  | 5.498241  | C70 | 11.825658 | 9.849939  | 4.876178  |
| H67  | 15.748038 | 0.659732  | 6.010698  | C71 | 11.447212 | 9.434597  | 3.561218  |
| C68  | 16.045580 | 2.487855  | 4.911069  | O73 | 11.810692 | 10.936030 | 5.434873  |
| H69  | 17.130047 | 2.447966  | 4.961431  | C73 | 10.818751 | 10.263054 | 2.512005  |
| C70  | 15.411866 | 3.561246  | 4.313628  | H74 | 10.675010 | 11.264301 | 2.929618  |
| H71  | 15.993161 | 4.398895  | 3.931638  | H75 | 11.437263 | 10.353658 | 1.609604  |
| C72  | 14.008168 | 3.640506  | 4.230782  | H76 | 9.842658  | 9.865798  | 2.204242  |
| C73  | 9.535605  | 9.249840  | 2.826565  |     |           |           |           |
| H74  | 9.069184  | 10.164832 | 3.204261  |     |           |           |           |
| H75  | 10.086569 | 9.487140  | 1.907076  |     |           |           |           |
| H76  | 8.740151  | 8.542005  | 2.560345  |     |           |           |           |

76

|            |           |          |           |
|------------|-----------|----------|-----------|
| 5b - P dis |           |          |           |
| Ru1        | 13.061726 | 5.814643 | 4.991431  |
| C12        | 11.486398 | 4.846907 | 6.478323  |
| C13        | 15.101536 | 6.804139 | 4.270302  |
| O4         | 11.666241 | 2.560128 | 2.242120  |
| N5         | 12.204841 | 8.625832 | 5.468800  |
| N6         | 11.633291 | 8.102918 | 3.491581  |
| N7         | 12.054347 | 7.564110 | 4.632658  |
| C8         | 12.485327 | 8.448535 | 6.861478  |
| C9         | 11.437221 | 8.047998 | 7.703492  |
| C10        | 11.724192 | 7.873720 | 9.052076  |
| H11        | 10.927727 | 7.547982 | 9.721719  |
| C12        | 12.993908 | 8.127280 | 9.569111  |
| C13        | 13.975288 | 8.626874 | 8.716990  |
| H14        | 14.949003 | 8.901268 | 9.124013  |
| C15        | 13.740812 | 8.823984 | 7.357556  |
| C16        | 10.043135 | 7.874083 | 7.187560  |
| H17        | 9.333818  | 7.813238 | 8.018881  |
| H18        | 9.950637  | 6.952796 | 6.600866  |
| H19        | 9.751238  | 8.722771 | 6.554723  |
| C20        | 13.284464 | 7.891387 | 11.020333 |
| H21        | 14.110662 | 8.517600 | 11.373644 |
| H22        | 13.567600 | 6.845903 | 11.196041 |
| H23        | 12.407230 | 8.096980 | 11.643977 |
| C24        | 14.750490 | 9.517658 | 6.499991  |
